# Supplementary material for: An Easy Route to Aziridine Ketones and Carbinols
Source: MDPI journal article supplement (doi:10.3390/ijms222313145), 2021-12-05
Supplement: s1 [file s1]

# An easy route to aziridine ketones and carbinols

## Experimental details for compounds 2,3, 5-11. Characterization data for compounds 1-11

### *tert*-Butyl 2-(bis(*tert*-butoxycarbonyl)carbamoyl)aziridine-1-carboxylate (**2a**):

Prepared after literature procedure [21, 26] from aziridine-2-carboxamide (0.50 g; 5.81 mmol), Boc<sub>2</sub>O (3.80 g; 17.42 mmol) and DMAP (0.07 g; 0.58 mmol). Yield 1.89 g (84%). Title compound **2a** was isolated by column chromatography on 450 mL silica with PE-EtOAc (3:1) eluent as a white crystalline solid, mp 67°C; *R*<sub>f</sub> = 0.6 (PE-EtOAc; 3:1). <sup>1</sup>H NMR (400 MHz, CDCl<sub>3</sub>) δ 3.99 (1H, dd, *J* = 5.5, 3.2 Hz, C<sub>2</sub>H), 2.57 (1H, dd, *J* = 3.2, 1.6 Hz, C<sub>3</sub>H), 2.46 (1H, dd, *J* = 5.5, 1.6 Hz, C<sub>3</sub>H), 1.52 (18H, s, *t*-butyl), 1.44 (9H, s, *t*-butyl). <sup>13</sup>C NMR (101 MHz, CDCl<sub>3</sub>) δ 159.9, 149.9, 149.2, 85.6, 82.2, 36.1, 32.6, 27.9, 27.7. HRMS (EI) [M+Na]<sup>+</sup>, found 409.1953. C<sub>18</sub>H<sub>30</sub>N<sub>2</sub>O<sub>7</sub>Na requires 409.1951.

### *tert*-Butyl (*tert*-butoxycarbonyl)(1-tritylaziridine-2-carbonyl)carbamate (**2b**):

Prepared after literature procedure [8] from N-tritylaziridine-2-carboxamide (7.08 g, 21.55 mmol), Boc<sub>2</sub>O (9.41 g, 43.11 mmol) and DMAP (0.26 g, 2.16 mmol). Yield 8.72 g (77%). Title compound **2b** was isolated by column chromatography on 500 mL silica with PE-EtOAc (10:1) eluent as a white crystalline solid, mp 113°C, *R*<sub>f</sub> = 0.4 (PE-EtOAc, 10:1). <sup>1</sup>H NMR (400 MHz, CDCl<sub>3</sub>) δ 7.50-7.40 (6H, m, Ar), 7.25-7.10 (9H, m, Ar), 2.80 (1H, dd, *J* = 6.1, 2.7 Hz, C<sub>2</sub>H), 2.32 (1H, dd, *J* = 2.7, 1.8 Hz, C<sub>3</sub>H), 1.40-1.36 (19H, m, C<sub>3</sub>H and *t*-butyl). <sup>13</sup>C NMR (101 MHz, CDCl<sub>3</sub>) δ 171.8, 149.5, 143.9, 129.6, 127.7, 127.0, 84.2, 74.7, 33.0, 29.9, 27.7. HRMS (EI) [M+Na]<sup>+</sup>, found 551.2515. C<sub>32</sub>H<sub>36</sub>N<sub>2</sub>O<sub>5</sub>Na requires 551.2522.

### *tert*-Butyl 2-(methoxy(methyl)carbamoyl)aziridine-1-carboxylate (**3b**):

Prepared after literature procedure [8] from *bis*-Boc amide **2a** (0.08 g, 0.21 mmol), hydroxylamine **3a** (prepared from MeNHOMe\*HCl (0.04 g, 0.42 mmol) and NaOH (0.017 g, 0.43 mmol)). Yield 0.015 g (31%) after procedure [8] (Table1, entry 6) and <1% (traces amount) after procedure [4] (Table 1, entry 3). Title compound **3b** was isolated by column chromatography on 200 mL silica with PE-EtOAc (3:1) eluent as a white foam *R*<sub>f</sub> = 0.2 (PE-EtOAc, 3:1). <sup>1</sup>H NMR (400 MHz, CDCl<sub>3</sub>) δ 3.83 (3H, s, NMe), 3.59-3.53 (1H, m, C<sub>2</sub>H), 3.26 (3H, s, OMe), 2.61 (1H, dd, *J* = 3.1, 1.5 Hz, C<sub>3</sub>H), 2.37 (1H, dd, *J* = 5.2, 1.5 Hz, C<sub>3</sub>H), 1.45 (9H, s, *t*-butyl). <sup>13</sup>C NMR (101 MHz, CDCl<sub>3</sub>) δ 168.9, 159.6, 86.1, 52.5, 34.8, 31.3, 27.8. HRMS (EI) [M+Na]<sup>+</sup>, found 253.1164. C<sub>10</sub>H<sub>18</sub>N<sub>2</sub>O<sub>4</sub>Na requires 253.1164.

### N-Methoxy-N-methyl-1-tritylaziridine-2-carboxamide (**3c**):

Prepared after literature procedure [8] from *bis*-Boc amide **2b** (0.25 g, 0.47 mmol), hydroxylamine **3a** (prepared from MeNHOMe\*HCl (0.09 g, 0.94 mmol) and NaOH (0.04 g, 0.95 mmol)). Yield 0.005g of impure material (Table1, entry 7). Title compound **3c** was isolated by column chromatography on 200 mL silica with PE-EtOAc (3:1) eluent as a white foam containing impurities *R*<sub>f</sub> = 0.2 (PE-EtOAc, 3:1). <sup>1</sup>H NMR (400 MHz, CDCl<sub>3</sub>) δ 7.51-7.42 (6H, m, Ar), 7.25-7.10 (9H, m, Ar), 3.30 (3H, s, NMe), 3.13 (3H, s, OMe), 2.35-2.24 (2H, m, C<sub>2</sub>H and C<sub>3</sub>H), 1.33 (1H, dd, *J* = 6.1, 1.8 Hz, C<sub>3</sub>H). <sup>13</sup>C NMR (101 MHz, CDCl<sub>3</sub>) δ 144.0, 129.6, 127.7, 122.0, 84.3, 74.6, 61.5, 28.1, 27.7. HRMS (EI) [M+Na]<sup>+</sup>, found 395.1734 C<sub>24</sub>H<sub>24</sub>N<sub>2</sub>O<sub>2</sub>Na requires 395.1735.

### *tert*-Butyl (3-chloro-1-(methoxy(methyl)amino)-1-oxopropan-2-yl)carbamate (**3d**):

Prepared after literature procedure [4] from ester **1a** (0.60 g, 2.98 mmol) MeNHOMe\*HCl and AlMe<sub>3</sub> (1 M in heptane). Yield 0.44 g, 55% (0.87 g, 8.91 mmol, 3 eq MeNHOMe\*HCl, 8.90 mL AlMe<sub>3</sub>, Table 1, entry 1); 0.15 g, 25% (0.29 g, 2.98 mmol, 1 eq MeNHOMe\*HCl, 2.97 mL AlMe<sub>3</sub>, Table 1, entry 2). Title compound **3d** was isolated by column chromatography on 200 mL silica with PE-EtOAc (3:1 then 1:1) eluent as a white crystalline solid, mp 134°C *R*<sub>f</sub> = 0.3 (PE-EtOAc, 1:1). <sup>1</sup>H NMR (400 MHz, CDCl<sub>3</sub>) δ 5.56-5.46 (1H, m, NH), 5.03-4.93 (1H, m, CH), 3.82-3.78 (2H, m, CH<sub>2</sub>), 3.77 (3H, s, NMe), 3.25 (3H, s, OMe), 1.45 (9H, s, *t*-Bu). <sup>13</sup>C NMR (101 MHz, CDCl<sub>3</sub>) δ 169.2, 155.2, 80.4, 61.8, 51.7, 44.7, 32.4, 28.5. Anal. Calcd for C<sub>10</sub>H<sub>19</sub>ClN<sub>2</sub>O<sub>4</sub>: C 45.03, H 7.18, N 10.50%. Found: C 45.62, H 7.19, N 10.17%.

### *tert*-Butyl (3,7-dimethyl-4-oxo-2,8-dioxo-3,7-diazanonan-5-yl)carbamate (**3e**):

Prepared after literature procedure [4] from ester **1a** (0.60 g, 2.98 mmol), MeNHOMe\*HCl and AlMe<sub>3</sub> (1 M in heptane). Yield 0.31 g, 36% (0.87 g, 8.91 mmol, 3 eq MeNHOMe\*HCl, 8.90 mL AlMe<sub>3</sub>, Table 1, entry 1); 0.17 g, 20% (0.29 g, 2.98 mmol, 1 eq MeNHOMe\*HCl, 2.97 mL AlMe<sub>3</sub>, Table 1, entry 2). Title compound **3d** was isolated by column chromatography on 200 mL silica with PE-EtOAc (3:1 then 1:1) eluent as a white crystalline solid, mp 116°C *R*<sub>f</sub> = 0.2 (PE-EtOAc, 1:1). <sup>1</sup>H NMR (400 MHz, CDCl<sub>3</sub>) δ 5.51-5.41 (1H, m, NH), 4.84-4.73 (1H, m, CH), 3.76 (3H, s, NMe), 3.43 (3H, s, OMe), 3.19 (3H, s, OMe), 3.01-2.91 (1H, m, CH<sub>2</sub>), 2.88-2.82 (1H, m, CH<sub>2</sub>), 2.56 (3H, s, NMe), 1.43 (9H, s, *t*-Bu). <sup>13</sup>C NMR (101 MHz, CDCl<sub>3</sub>) δ 171.9, 155.7, 79.7, 61.7, 61.6, 59.5, 50.0, 45.3, 32.6, 28.5. HRMS (EI) [M+Na]<sup>+</sup>, found 314.1707. C<sub>12</sub>H<sub>25</sub>N<sub>3</sub>O<sub>5</sub>Na requires 314.1692.

### N,O-dimethyl-N-tritylhydroxylamine (3f):

Prepared after literature procedure [4] from ester **1b** (0.14 g, 0.41 mmol), MeNHOMe·HCl and AlMe<sub>3</sub> (1 M in heptane). Yield 0.08 g, 62% (0.12 g, 1.23 mmol, 3 eq MeNHOMe·HCl, 1.23 mL AlMe<sub>3</sub>, Table 1, entry 4); 0.05 g, 42% (0.04 g, 0.41 mmol, 1 eq MeNHOMe·HCl, 0.41 mL AlMe<sub>3</sub>, Table 1, entry 5). Title compound **3f** was isolated by column chromatography on 50 mL silica with PE-EtOAc (3:1) eluent as a white amorphous solid *R*<sub>f</sub> = 0.8 (PE-EtOAc, 3:1). <sup>1</sup>H NMR (400 MHz, CDCl<sub>3</sub>) δ 7.52-7.46 (6H, m, Ar), 7.26-7.11 (9H, m, Ar), 3.52 (3H, s, OMe), 2.33 (3H, s, NMe). <sup>13</sup>C NMR (101 MHz, CDCl<sub>3</sub>) δ 143.1, 129.9, 127.4, 126.4, 80.0, 58.8, 38.2. HRMS (EI) [M+H]<sup>+</sup>, found 304.1704. C<sub>21</sub>H<sub>22</sub>NO requires 304.1701.

### 1-(1-Triphenylmethylaziridine-2-yl) ethanone (5a):

Prepared after general procedure from amide **4a** (2.04 g, 5.72 mmol), MeLi (1.5 M solution in hexanes), 10 mL THF. Yield 1.44 g, 77% (2 h, 1 eq, 5.72 mmol, 3.86 mL MeLi; Table 2, entry 1); 1.75 g, 93% (2 h, 2 eq, 11.44 mmol, 7.63 mL MeLi; Table 2, entry 2); 1.32 g, 70% (24 h, 2 eq, 11.44 mmol, 7.63 mL MeLi, Table 2, entry 3). Title compound **5a** was isolated by column chromatography on 400 mL silica with PE-EtOAc (4:1) eluent as a white crystalline solid, mp 105°C, *R*<sub>f</sub> = 0.5 (PE-EtOAc, 4:1). IR (CHCl<sub>3</sub>) 3057, 3021, 1699, 1489, 1448, 1354, 1218, 1003, 754, 708 cm<sup>-1</sup>. <sup>1</sup>H NMR (400 MHz, CDCl<sub>3</sub>) δ 7.52-7.39 (6H, m, Ar), 7.36-7.17 (9H, m, Ar), 2.86 (3H, s, methyl), 2.21 (1H, dd, *J* = 2.6, 0.9 Hz, C<sub>3</sub>H), 1.98 (1H, dd, *J* = 6.3, 2.6 Hz, C<sub>3</sub>H), 1.44 (1H, dd, *J* = 6.3, 0.9 Hz, C<sub>2</sub>H). <sup>13</sup>C NMR (101 MHz, CDCl<sub>3</sub>) δ 207.9, 143.7, 129.4, 128.1, 127.9, 127.2, 74.7, 39.6, 29.2, 25.2. HRMS (EI) [M+H]<sup>+</sup>, found 328.1694. C<sub>23</sub>H<sub>22</sub>NO requires 328.1701.

### 1-(1-Triphenylmethylaziridine-2-yl) pentane-1-one (5b):

Prepared after general procedure from amide **4a** (2.26 g, 6.57 mmol), *n*-BuLi (2.5 M solution in hexanes), 10 mL THF. Yield 0.95 g, 39% (2 h, 1 eq, 6.57 mmol, 2.54 mL *n*-BuLi; Table 2, entry 4); 1.07 g, 44% (2 h, 2 eq, 13.14 mmol, 5.07 mL *n*-BuLi; Table 2, entry 5); 0.92 g, 38% (24 h, 2 eq, 13.14 mmol, 5.07 mL *n*-BuLi; Table 2, entry 6). Title compound **5b** was isolated by column chromatography on 400 mL silica with PE-EtOAc (4:1) eluent as a white crystalline solid, mp 95°C, *R*<sub>f</sub> = 0.6 (PE-EtOAc, 4:1). IR (CHCl<sub>3</sub>) 3057, 2958, 2931, 2872, 1706, 1489, 1448, 1218, 1004, 751, 710 cm<sup>-1</sup>. <sup>1</sup>H NMR (400 MHz, CDCl<sub>3</sub>) δ 7.34-7.16 (15H, m, Ar), 2.73-2.64 (1H, m, *n*-butyl), 2.54-2.44 (1H, m, *n*-butyl), 2.19 (1H, dd, *J* = 2.9, 1.4 Hz, C<sub>3</sub>H), 2.00 (1H, dd, *J* = 6.3, 2.9 Hz, C<sub>3</sub>H), 1.67-1.51 (2H, m, *n*-butyl), 1.41 (1H, dd, *J* = 6.3, 1.4 Hz, C<sub>2</sub>H), 1.40-1.30 (2H, m, *n*-butyl); 0.93 (3H, t, *J* = 7.1 Hz, *n*-butyl). <sup>13</sup>C NMR (101 MHz, CDCl<sub>3</sub>) δ 209.5, 143.7, 129.5, 127.8, 127.1, 74.6, 38.6, 38.0, 29.3, 25.8, 22.6, 14.1. HRMS (EI) [M+H]<sup>+</sup>, found 370.2169. C<sub>26</sub>H<sub>28</sub>NO requires 370.2171.

### 2-Methyl-1-(1-triphenylmethylaziridine-2-yl)-butane-1-one (mixture of diastereomers) (5c):

Prepared after general procedure from amide **4a** (0.54 g, 1.50 mmol), *s*-BuLi (1.25 M solution in hexanes), 15 mL THF. Yield 0.23g, 41% (2h, 1eq, 1.50 mmol, 1.20mL *s*-BuLi; Table 2, entry 7); 0.20 g, 36% (24 h, 1 eq, 1.50 mmol, 1.20 mL *s*-BuLi; Table 2, entry 8); 0.24g, 43% (2h, 2eq, 3.00 mmol, 2.40mL *s*-BuLi; Table 2, entry 9) 0.26 g, 47% (24 h, 2 eq, 3.00 mmol, 2.40 mL *s*-BuLi; Table 2, entry 10). Title compound **5c** was isolated by column chromatography on 150 mL silica with PE-EtOAc (9:1) eluent as a white amorphous solid, *R*<sub>f</sub> = 0.5 (PE-EtOAc, 4:1). IR (CHCl<sub>3</sub>) 3350, 3056, 3022, 2968, 2933, 2876, 1713, 1598, 1489, 1466, 1381, 1218, 757, 704 cm<sup>-1</sup>. <sup>1</sup>H NMR (400 MHz, CDCl<sub>3</sub>) δ (mixture of isomers) 7.56-7.40 (6H, m, Ar), 7.35-7.15 (9H, m, Ar), 2.68 (1H, heptet, *J* = 7.0 Hz, *s*-Bu), 2.23-2.20 (1H, m, C<sub>3</sub>H), 2.03 (1H, dd, *J* = 6.3, 2.8 Hz, C<sub>3</sub>H), 1.74-1.54 (1H, m, *s*-Bu), 1.43 (1H, dd, *J* = 6.2, 1.7 Hz, C<sub>3</sub>H), 1.36 (1H, duplet of heptets, *J* = 7.4, 2.4 Hz, *s*-Bu), 1.06 and 1.02 (1.5H and 1.5H, d and d, *J* = 7.0 and 7.0 Hz, *s*-Bu), 0.86 (3H, dt, *J* = 7.4, 2.4 Hz, *s*-Bu). <sup>13</sup>C NMR (101 MHz, CDCl<sub>3</sub>) δ 212.2, 212.0, 148.5, 147.0, 144.4, 143.8, 129.5, 128.2, 128.1, 127.7, 127.3, 127.1, 126.8, 44.6, 45.8, 45.3, 37.0, 36.9, 30.2, 30.0, 26.3, 25.7, 16.5, 16.0, 11.9. HRMS (EI) [M+Na]<sup>+</sup>, found 392.1985. C<sub>26</sub>H<sub>27</sub>NONa requires 392.1990.

### 2,2-Dimethyl-1-(1-triphenylmethylaziridine-2-yl)-propane-1-one (5d):

Prepared after general procedure from amide **4a** (2.14 g, 6.00 mmol), *t*-BuLi (1.5 M solution in hexanes), 15 mL THF. Yield 0.66 g, 30% (2 h, 1 eq, 6.00 mmol, 4.00 mL *t*-BuLi; Table 2, entry 11); 0.71 g, 32% (2 h, 2 eq, 12.00 mmol, 8.00 mL *t*-BuLi; Table 2, entry 12); 0.64 g, 29% (24 h, 2 eq, 12.00 mmol, 8.00 mL *t*-BuLi; Table 2, entry 13). Title compound **5d** was isolated by column chromatography on 300 mL silica with PE-EtOAc (10:1) eluent as a white crystalline solid, mp 100°C, *R*<sub>f</sub> = 0.4 (PE-EtOAc, 5:1). IR (CHCl<sub>3</sub>) 3057, 3021, 2969, 2932, 1713, 1487, 1476, 1395, 1218, 1070, 1014, 756, 707 cm<sup>-1</sup>. <sup>1</sup>H NMR (400 MHz, CDCl<sub>3</sub>) δ 7.57-7.42 (6H, m, Ar), 7.37-7.15 (9H, m, Ar), 2.29-2.16 (2H, m, C<sub>3</sub>H), 1.44 (1H, dd, *J* = 6.1, 2.4 Hz, C<sub>2</sub>H), 1.04 (9H, s, *t*Bu). <sup>13</sup>C NMR (101 MHz, CDCl<sub>3</sub>) δ 212.0, 144.0, 129.6, 127.7, 127.1, 74.7, 44.4, 32.7, 31.1, 26.2. Anal. Calcd for C<sub>26</sub>H<sub>27</sub>NO: C 84.51, H 7.37, N 3.79%. Found: C 84.43, H 7.51, N, 3.73%.

### (1-Triphenylmethylaziridine-2-yl)-phenyl-methanone (5e):

Prepared after general procedure from amide **4a** (3.00 g, 8.42 mmol), PhLi (2.00 M solution in toluene), 21 mL THF. Yield 1.67 g, 51% (2 h, 1 eq, 8.42 mmol, 4.20 mL PhLi; Table 2, entry 14); 2.59 g, 79% (12 h, 1 eq, 8.42 mmol, 4.20 mL PhLi; Table 2, entry 15); 1.64 g, 50% (2 h, 2 eq, 16.84 mmol, 8.40 mL PhLi; Table 2, entry 16); 2.66 g, 81% (12 h, 2 eq, 16.84 mmol, 8.40 mL PhLi; Table 2, entry 17); 2.56 g, 78% (24 h, 4 eq, 33.66 mmol, 16.80

mL PhLi; Table 2, entry 18). Title compound **5e** was isolated by column chromatography on 400 mL silica with PE-EtOAc (10:1) eluent as a white crystalline solid, mp 129°C,  $R_f$  = 0.3 (PE-EtOAc, 7:1). IR (CHCl<sub>3</sub>) 3084, 3063, 3019, 1965, 1683, 1598, 1489, 1447, 1397, 1231, 1033, 754, 708 cm<sup>-1</sup>. <sup>1</sup>H NMR (400 MHz, CDCl<sub>3</sub>)  $\delta$  7.91-7.11 (20H, m, Ar), 2.74 (1H, dd,  $J$  = 6.3, 2.8 Hz, C<sub>2</sub>H), 2.43 (1H, unresolved dd,  $J$  = 2.0 Hz, C<sub>3</sub>H), 1.60 (1H, dd,  $J$  = 6.3, 2.0 Hz, C<sub>3</sub>H). <sup>13</sup>C NMR (101 MHz, CDCl<sub>3</sub>)  $\delta$  197.1, 143.9, 137.4, 133.3, 129.6, 128.7, 128.4, 127.8, 127.1, 74.9, 35.0, 30.9. Anal. Calcd for C<sub>28</sub>H<sub>23</sub>NO: C 86.34, H 5.96, N 3.60%. Found: C 86.08, H 5.92, N 3.49%.

#### 2-(1-Triphenylmethylaziridine-2-yl)-propan-2-ol (**6a**):

Prepared after general procedure from ketone **5a** (0.44 g, 1.34 mmol), MeLi (1.60 M solution in hexanes), 20 mL THF. Yield 0.15 g, 33% (1 h, 1 eq, 1.34 mmol, 0.84 mL MeLi; Table 3, entry 1); 0.16 g, 35% (12 h, 1 eq, 1.34 mmol, 0.84 mL MeLi; Table 3, entry 2); 0.15 g, 33% (1 h, 4 eq, 5.36 mmol, 3.36 mL MeLi; Table 3, entry 3); 0.15 g, 32% (12 h, 4 eq, 5.36 mmol, 3.36 mL MeLi; Table 3, entry 4). Title compound **6a** was isolated by column chromatography on 140 mL silica with PE-EtOAc (10:1) eluent as a white crystalline solid, mp 120°C,  $R_f$  = 0.4 (PE-EtOAc, 9:1). IR (CHCl<sub>3</sub>) 3463, 3056, 2974, 2929, 1596, 1489, 1448, 1332, 1220, 1152, 1025, 954, 756, 707 cm<sup>-1</sup>. <sup>1</sup>H NMR (400 MHz, CDCl<sub>3</sub>)  $\delta$  7.58-7.43 (6H, m, Ar), 7.32-7.16 (9H, m, Ar), 3.04 (1H, s, OH), 1.89 (1H, unresolved dd,  $J$  = 3.4 Hz, C<sub>3</sub>H), 1.36 (1H, dd,  $J$  = 6.2, 3.4 Hz, C<sub>2</sub>H), 1.15 (3H, s, Me), 1.09 (3H, s, Me), 1.11-1.08 (1H, m, C<sub>3</sub>H). <sup>13</sup>C NMR (101 MHz, CDCl<sub>3</sub>)  $\delta$  144.4, 129.6, 127.7, 127.0, 74.1, 67.6, 42.5, 29.6, 26.6, 23.6. HRMS (EI) [M+H]<sup>+</sup>, found 344.2011. C<sub>24</sub>H<sub>26</sub>NO requires 344.2014.

#### Diphenyl-(1-triphenylmethylaziridine-2-yl)-methanol (**6b**):

Prepared after general procedure from ketone **5e** (0.50 g, 1.28 mmol), PhLi (2.00 M solution in toluene), 15 mL THF. Yield 0.49 g, 82% (1 h, 1 eq, 1.28 mmol, 0.64 mL PhLi; Table 3, entry 5); 0.51 g, 85% (12 h, 1 eq, 1.28 mmol, 0.64 mL PhLi; Table 3, entry 6); 0.47 g, 79% (1 h, 4 eq, 5.12 mmol, 2.56 mL PhLi; Table 3, entry 7); 0.459 g, 99% (12 h, 4 eq, 5.12 mmol, 2.56 mL PhLi; Table 3, entry 8) 0.59 g, 98% (24 h, 4 eq, 5.12 mmol, 2.56 mL PhLi; Table 3, entry 9). Title compound **6b** was isolated by column chromatography on 170 mL silica with PE-EtOAc (10:1) eluent as a white crystalline solid, mp 154°C,  $R_f$  = 0.5 (PE-EtOAc, 9:1). IR (CHCl<sub>3</sub>) 3401, 3087, 3062, 3024, 1953, 1598, 1495, 1447, 1338, 1217, 1184, 1024, 991, 764, 707 cm<sup>-1</sup>. <sup>1</sup>H NMR (400 MHz, CDCl<sub>3</sub>)  $\delta$  7.48-7.10 (25H, m, Ar), 4.45 (1H, s, OH), 2.38 (1H, dd,  $J$  = 6.3, 3.3 Hz, C<sub>2</sub>H), 2.11 (1H, unresolved dd,  $J$  = 3.3 Hz, C<sub>3</sub>H), 1.36 (1H, unresolved dd,  $J$  = 6.3 Hz, C<sub>3</sub>H). <sup>13</sup>C NMR (101 MHz, CDCl<sub>3</sub>)  $\delta$  147.1, 145.6, 143.8, 129.4, 128.1, 127.9, 127.6, 127.0, 126.9, 126.4, 126.1, 74.2, 41.7, 24.0. Anal. Calcd for C<sub>34</sub>H<sub>29</sub>NO: C 87.33, H 6.25, N 3.00%. Found: C 87.03, H 6.12, N 2.85%.

#### 2,2,4,4-Tetramethyl-(1-triphenylmethylaziridine-2-yl)-pentane-3-ol (**6c**):

Prepared after general procedure from ketone **5d** (0.50 g, 1.35 mmol), *t*-BuLi (1.50 M solution in hexanes), 15 mL THF. Yield 0.17 g, 30% (1 h, 1 eq, 1.35 mmol, 0.90 mL *t*-BuLi; Table 3, entry 10); 0.39 g, 68% (12 h, 1 eq, 1.35 mmol, 0.90 mL *t*-BuLi; Table 3, entry 11); 0.41 g, 70% (12 h, 4 eq, 5.40 mmol, 3.60 mL *t*-BuLi; Table 3, entry 12). Title compound **6c** was isolated by column chromatography on 200 mL silica with PE-EtOAc (10:1) eluent as a white crystalline solid, mp 167°C,  $R_f$  = 0.5 (PE-EtOAc, 10:1). IR (CHCl<sub>3</sub>) 3467, 3061, 3018, 2965, 2913, 2875, 1594, 1489, 1449, 1391, 1216, 1004, 974, 742, 709 cm<sup>-1</sup>. <sup>1</sup>H NMR (400 MHz, CDCl<sub>3</sub>)  $\delta$  7.56-7.48 (6H, m, Ar), 7.29-7.21 (6H, m, Ar), 7.20-7.14 (3H, m, Ar), 2.87 (1H, s, OH), 2.31 (1H, unresolved dd,  $J$  = 3.3 Hz, C<sub>3</sub>H), 1.42-1.31 (2H, m, C<sub>3</sub>H and C<sub>2</sub>H), 0.92 (9H, s, *t*-Bu), 0.86 (9H, s, *t*-Bu). <sup>13</sup>C NMR (101 MHz, CDCl<sub>3</sub>)  $\delta$  144.3, 129.8, 127.6, 126.7, 77.0, 75.6, 42.2, 41.4, 40.9, 30.2, 30.0, 26.5. Anal. Calcd for C<sub>30</sub>H<sub>37</sub>NO: C 84.25, H 8.72, N 3.27%. Found: C 83.93, H 8.98, N 3.27%. Crystal data: monoclinic,  $a$  = 25.1187(8),  $b$  = 8.7502(3),  $c$  = 23.5529(8) Å,  $\beta$  = 105.528(2)°;  $V$  = 4987.8(3) Å<sup>3</sup>,  $Z$  = 8,  $\mu$  = 0.067 mm<sup>-1</sup>,  $D_{\text{calc}}$  = 1.139 g·cm<sup>-3</sup>; space group is C2/c. For further details, see crystallographic data deposited at the Cambridge Crystallographic Data Centre as Supplementary Publications Numbers CCDC 1866495. Copies of the data can be obtained, free of charge, on application to CCDC, 12 Union Road, Cambridge CB2 1EZ, UK.

#### Mixture of 3,3-Dimethyl-2-(1-trityl-aziridin-2-yl)-butan-2-ol (**6d**) (mixture of diastereomers) and phenol (**6d1**):

Prepared after general procedure from ketone **5a** (0.15 g, 0.46 mmol), *t*-BuLi (1.50 M solution in hexanes), 15 mL THF. Yield 0.09 g of mixture, ~25% (12 h, 4 eq, 1.84 mmol, 1.24 mL *t*-BuLi; Table 3, entry 13). Title compound **6d** in 1:1 mixture with compound **6d1** was isolated by column chromatography on 50 mL silica with PE-EtOAc (10:1) eluent as a colourless oil,  $R_f$  = 0.4 (PE-EtOAc 10:1). IR (CHCl<sub>3</sub>) 2967, 1595, 1491, 1448, 1394, 1367, 1330, 1235, 1218, 1121, 1095, 1021, 912, 758, 708 cm<sup>-1</sup>. <sup>1</sup>H NMR (400 MHz, CDCl<sub>3</sub>)  $\delta$  7.58-7.46 (5H, m, Ar), 7.32-7.11 (10H, m, Ar), 3.02 (0.5H, brs, OH, **6d**), 2.38 (0.5H, brs, OH, **6d1**), 2.13 (0.5H, unresolved dd,  $J$  = 3.4 Hz, C<sub>3</sub>H, **6d**), 1.80 (0.5H, unresolved dd,  $J$  = 3.3 Hz, C<sub>3</sub>H, **6d1**), 1.57 (0.5H, dd,  $J$  = 6.6, 3.3 Hz, C<sub>2</sub>H, **6d1**), 1.37 (0.5H, dd,  $J$  = 6.1, 3.6 Hz, C<sub>2</sub>H, **6d**), 1.20 (0.5H, unresolved dd,  $J$  = 6.6 Hz, C<sub>3</sub>H, **6d**), 1.15 (0.5H, unresolved dd,  $J$  = 6.6 Hz, C<sub>3</sub>H, **6d1**), 1.14 (1.5H, s, Me, **6d**), 1.10 ((1.5H, s, Me, **6d1**), 0.83 (4.5H, s, *t*-Bu, **6d**), 0.78 (4.5H, s, *t*-Bu, **6d1**). <sup>13</sup>C NMR (101 MHz, CDCl<sub>3</sub>)  $\delta$  144.4, 144.3, 129.7, 129.6, 127.7, 127.6, 126.9, 74.7, 74.5, 74.3, 72.6, 40.6, 39.3, 37.6, 37.5, 25.9, 25.8, 25.7, 25.6, 24.5, 19.4. LC-MS  $m/z$  408 [M+Na]<sup>+</sup>. HRMS (EI) [M+Na]<sup>+</sup>, found 408.2298. C<sub>27</sub>H<sub>31</sub>NONa requires 408.2303.



**2-[[2-(1-Hydroxy-1,2,2-trimethyl-propyl)-aziridin-1-yl]diphenyl-methyl]phenol** (mixture of diastereomers) (**6d1**):

Prepared after general procedure from ketone **5d** (0.15 g, 0.41 mmol), MeLi (1.60 M solution in hexanes), 15 mL THF. Yield 0.09 g, 52% (12 h, 4 eq, 1.64 mmol, 1.03 mL MeLi; Table 3, entry 14). Title compound **6d1** was isolated by column chromatography on 100 mL silica with PE-EtOAc (10:1) eluent as a white crystalline solid, mp 135°C,  $R_f$  = 0.5 (PE-EtOAc, 5:1). IR (CHCl<sub>3</sub>) 3571, 2957, 1586, 1472, 1410, 1370, 1243, 1126, 1037, 1009, 928, 819, 763. <sup>1</sup>H NMR (400 MHz, CDCl<sub>3</sub>)  $\delta$  7.54-7.49 (6H, m, Ar), 7.30-7.16 (8H, m, Ar), 2.35 (1H, brs, OH), 1.79 (1H, unresolved dd,  $J$  = 3.3 Hz, C<sub>3</sub>H), 1.57 (1H, dd,  $J$  = 6.6, 3.3 Hz, C<sub>2</sub>H), 1.16 (1H, unresolved dd,  $J$  = 6.6 Hz, C<sub>3</sub>H), 1.11 (3H, s, Me), 0.76 (9H, s, *t*-Bu). <sup>13</sup>C NMR (101 MHz, CDCl<sub>3</sub>)  $\delta$  144.5, 129.6, 127.7, 126.9, 74.7, 74.5, 39.4, 37.6, 25.8, 25.7, 19.4. HRMS (EI) [M+Na]<sup>+</sup>, found 424.2252. C<sub>27</sub>H<sub>31</sub>NO<sub>2</sub>Na requires 424.2252. HRMS (EI) [M-H]<sup>-</sup>, found 400.2278. C<sub>27</sub>H<sub>30</sub>NO<sub>2</sub> requires 400.2277. Anal. Calcd for C<sub>27</sub>H<sub>31</sub>NO<sub>2</sub>: C 80.76, H 7.78, N 3.49%. Found: C 79.71, H 7.71, N 3.42%. Crystal data: monoclinic,  $a$  = 10.1290(2),  $b$  = 21.4734(5),  $c$  = 11.2441(3) Å,  $\beta$  = 114.2409(10)°;  $V$  = 2229.98(9) Å<sup>3</sup>,  $Z$  = 4,  $\mu$  = 0.074 mm<sup>-1</sup>,  $D_{\text{calc}}$  = 1.196 g·cm<sup>-3</sup>; space group is P2<sub>1</sub>/ $n$ . For further details, see crystallographic data deposited at the Cambridge Crystallographic Data Centre as Supplementary Publications Numbers CCDC 1868265. Copies of the data can be obtained, free of charge, on application to CCDC, 12 Union Road, Cambridge CB2 1EZ, UK.

**2,2-Dimethyl-1-phenyl-(1-triphenylmethyl-aziridine-2-yl)-propane-1-ol** (mixture of diastereomers) (**6e**):

Prepared after general procedure from ketone **5d** (0.15 g, 0.41 mmol), PhLi (2.00 M solution in toluene, 4 eq, 1.64 mmol, 0.82 mL), 10 mL THF. Reaction time 12 h. Yield 0.18 g, 100% (Table 3, entry 15). Title compound **6e** was isolated by column chromatography on 100 mL silica with PE-EtOAc (10:1) eluent as a white crystalline solid, mp 170°C,  $R_f$  = 0.5 (PE-EtOAc, 5:1). IR (CHCl<sub>3</sub>) 3367, 3057, 2979, 2962, 2907, 2872, 1596, 1487, 1447, 1394, 1338, 1218, 1030, 986, 759, 707 cm<sup>-1</sup>. <sup>1</sup>H NMR (400 MHz, CDCl<sub>3</sub>)  $\delta$  7.57-7.45 (6H, m, Ar), 7.34-7.04 (14H, m, Ar), 4.53 (1H, s, OH), 2.13 (1H, dd,  $J$  = 7.0, 3.7 Hz, C<sub>2</sub>H), 1.38 (1H, unresolved dd,  $J$  = 3.7 Hz, C<sub>3</sub>H); 1.31 (1H, unresolved dd,  $J$  = 7.0 Hz, C<sub>3</sub>H); 0.70 (9H, s, *t*-Bu). <sup>13</sup>C NMR (101 MHz, CDCl<sub>3</sub>)  $\delta$  45.4, 143.9, 129.7, 127.7, 127.5, 127.1, 126.6, 126.0, 76.3, 74.8, 40.1, 38.4, 26.3, 25.9. HRMS (EI) [M+H]<sup>+</sup>, found 448.2629. C<sub>32</sub>H<sub>34</sub>NO requires 448.1990. Anal. Calcd for C<sub>32</sub>H<sub>33</sub>NO: C 85.87, H 7.43, N 3.13%. Found: C 85.98, H 7.17, N 2.97%.

**1-Phenyl-(1-triphenylmethyllaziridine-2-yl)-ethanol** (mixture of diastereomers) (**6f**):

Prepared after general procedure from ketone **5e** (0.15 g, 0.39 mmol), MeLi (1.60 M solution in hexanes), 15 mL THF. Reaction time 12 h. Yield 0.14 g, 88% (1 eq, 0.39 mmol, 0.24 mL MeLi; Table 3, entry 16); 0.10 g, 61% (4 eq, 1.56 mmol, 0.96 mL MeLi; Table 3, entry 17). Title compound **6f** (0.49 g, 61%) was isolated by column chromatography on 150 mL silica with PE-EtOAc (4:1) eluent as a white crystalline solid, mp 151°C,  $R_f$  = 0.6 (PE-EtOAc, 4:1). IR (CHCl<sub>3</sub>) 3446, 3057, 3030, 2979, 1596, 1495, 1447, 1329, 1218, 1091, 1061, 1020, 923, 754, 701 cm<sup>-1</sup>. <sup>1</sup>H NMR (400 MHz, CDCl<sub>3</sub>)  $\delta$  7.43-7.09 (20H, m, Ar), 3.59 (1H, s, OH), 2.03 (1H, unresolved dd,  $J$  = 3.3 Hz, C<sub>3</sub>H), 1.90 (1H, dd,  $J$  = 6.6, 3.3 Hz, C<sub>2</sub>H), 1.37 (3H, s, Me), 1.25 (1H, unresolved dd,  $J$  = 6.6 Hz C<sub>3</sub>H). <sup>13</sup>C NMR (101 MHz, CDCl<sub>3</sub>)  $\delta$  148.3, 144.0, 129.4, 128.1, 127.5, 126.8, 126.6, 124.9, 73.9, 71.2, 42.6, 28.6, 23.6. HRMS (EI) [M+H]<sup>+</sup>, found 406.2164. C<sub>29</sub>H<sub>28</sub>NO requires 406.2171.

**(1-*tert*-Butyloxycarbonylaziridine-2-yl)-methyl-methanone** (**7a**):

Prepared after general procedure from amide **4b** (0.51 g, 2.38 mmol), MeLi (1.50 M solution in hexanes), 10 mL THF. Reaction time 1 h. Yield 0.27 g, 62% (1 eq, 2.38 mmol, 1.59 mL MeLi; Table 4, entry 1); 0.04 g, 8% (2 eq, 4.76 mmol, 3.18 mL MeLi; Table 4, entry 2). Title compound **7a** was isolated by column chromatography on 100 mL silica with PE-EtOAc (2:1) eluent as a colourless oil,  $R_f$  = 0.6 (PE-EtOAc, 2:1). IR (CHCl<sub>3</sub>) 3422, 2981, 2934, 1733, 1368, 1331, 1300, 1159, 854 cm<sup>-1</sup>. <sup>1</sup>H NMR (400 MHz, CDCl<sub>3</sub>)  $\delta$  3.05 (1H, dd,  $J$  6.0, 3.2 Hz, C<sub>2</sub>H), 2.39 (1H, dd,  $J$  6.0, 1.3 Hz, C<sub>3</sub>H), 2.35 (1H, dd,  $J$  3.2, 1.3 Hz, C<sub>3</sub>H), 2.15 (3H, s, Me), 1.40 (9H, s, *t*-Bu). <sup>13</sup>C NMR (101 MHz, CDCl<sub>3</sub>)  $\delta$  203.6, 160.1, 82.3, 41.1, 31.8, 27.9, 27.0. LC-MS  $m/z$  186 [M+H]<sup>+</sup>. HRMS (EI) [M+Na]<sup>+</sup>, found 208.0951. C<sub>9</sub>H<sub>15</sub>NO<sub>3</sub>Na requires 208.0950.

**(1-*tert*-Butyloxycarbonylaziridine-2-yl)-*n*-butyl-methanone** (**7b**):

Prepared after general procedure from amide **4b** (0.50 g, 2.33 mmol), *n*-BuLi (2.50 M solution in toluene, 1 eq, 2.33 mmol, 0.93 mL), 10 mL THF, reaction time 1 h. Yield 0.40 g, 75% (Table 4, entry 3). Title compound **7b** was isolated by column chromatography on 100 mL silica with PE-EtOAc (3:1) eluent as a colourless oil,  $R_f$  = 0.7 (PE-EtOAc, 3:1). IR (CHCl<sub>3</sub>) 2962, 2935, 2874, 1733, 1730, 1396, 1369, 1338, 1300, 1220, 1159, 1055, 855 cm<sup>-1</sup>. <sup>1</sup>H NMR (400 MHz, CDCl<sub>3</sub>)  $\delta$  3.11-3.07 (1H, m, C<sub>2</sub>H), 2.59-2.41 (2H, m, *n*-Bu), 2.39-2.36 (2H, m, C<sub>3</sub>H), 1.61-1.53 (2H, m, *n*-Bu), 1.42 (9H, s, *t*-Bu), 1.37-1.25 (2H, m, *n*-Bu), 0.88 (3H, t,  $J$  = 7.3 Hz, *n*-Bu). <sup>13</sup>C NMR (101 MHz, CDCl<sub>3</sub>)  $\delta$  205.6, 160.1, 82.1, 40.4, 32.0, 28.0, 25.6, 22.4, 13.9. LC-MS  $m/z$  228 [M+H]<sup>+</sup>. HRMS (EI) [M+Na]<sup>+</sup>, found 250.1418. C<sub>12</sub>H<sub>21</sub>NO<sub>3</sub>Na requires 250.1419.

**(1-*tert*-Butyloxycarbonylaziridine-2-yl)-*tert*-butyl-methanone (7c):**

Prepared after general procedure from amide **4b** (0.58 g, 2.71 mmol), *t*-BuLi (1.50 M solution in hexanes, 1.80 mL, 2.71 mmol), 20 mL THF. Reaction time 1 h. Yield 0.50 g, 82% (Table 4, entry 4). Title compound **7c** was isolated by column chromatography on 40 mL silica with PE-EtOAc (3:1) eluent as a colourless oil,  $R_f$  = 0.7 (PE-EtOAc, 3:1). IR (CHCl<sub>3</sub>) 2974, 2935, 2874, 1735, 1479, 1394, 1369, 1334, 1220, 1160, 1064, 1013, 856, 799 cm<sup>-1</sup>; LC-MS  $m/z$  228 [M+H]<sup>+</sup>. <sup>1</sup>H NMR (400 MHz, CDCl<sub>3</sub>)  $\delta$  3.41 (1H, dd,  $J$  = 5.1, 3.1 Hz, C<sub>2</sub>H), 2.40 (1H, dd,  $J$  = 3.1, 2.1 Hz, C<sub>3</sub>H), 2.31 (1H, dd,  $J$  = 5.1, 2.1 Hz, C<sub>3</sub>H), 1.40 (9H, s, *t*-Bu), 1.21 (9H, s, *t*-Bu). <sup>13</sup>C NMR (101 MHz, CDCl<sub>3</sub>)  $\delta$  208.3, 160.0, 81.8, 44.3, 35.8, 32.8, 28.0, 25.6. HRMS (EI) [M-H]<sup>-</sup>, found 226.1438. C<sub>12</sub>H<sub>21</sub>NO<sub>3</sub> requires 226.1443. HRMS (EI) [M+Na]<sup>+</sup>, found 250.1421. C<sub>12</sub>H<sub>21</sub>NO<sub>3</sub>Na requires 250.1419.

**(1-*tert*-Butyloxycarbonylaziridine-2-yl)-phenyl-methanone (7d):**

Prepared after general procedure from amide **4b** (0.50 g, 2.33 mmol), PhLi (2.00 M solution in toluene), 20 mL THF. Yield 0.29 g, 51% (1 h, 4 eq, 9.32 mmol, 4.66 mL PhLi; Table 4, entry 6); 0.34 g, 60% (1 h, 1 eq, 2.33 mmol, 1.17 mL PhLi; Table 4, entry 5). From ester **1c** (0.50 g, 1.80 mmol), PhLi (2.00 M solution in toluene), 20 mL THF. Reaction time 1 h. Yield 0.12 g, 26% (1 eq, 1.80 mmol, 0.90 mL PhLi; Table 5, entry 1); 0.05 g, 10% (2 eq, 3.60 mmol, 1.80 mL PhLi; Table 5, entry 2); 0.04 g, 8% (4 eq, 7.20 mmol, 3.60 mL PhLi; Table 5, entry 3). From ketone **8** (0.10 g, 0.68 mmol), Boc<sub>2</sub>O (0.15 g, 0.68 mmol), 5 mL CH<sub>2</sub>Cl<sub>2</sub>, RT, reaction time 1 h. Yield 0.13 g, 78%. Title compound **7d** was isolated by column chromatography on 300 mL silica with PE-EtOAc (1:1) eluent as a white crystalline solid, mp 55°C.  $R_f$  = 0.5 (PE-EtOAc, 2:1). IR (CHCl<sub>3</sub>) 3066, 2979, 2934, 1733, 1683, 1598, 1450, 1370, 1338, 1310, 1231, 1158, 1018, 851, 710 cm<sup>-1</sup>. <sup>1</sup>H NMR (400 MHz, CDCl<sub>3</sub>)  $\delta$  8.11-8.07 (2H, m, Ar), 7.65-7.60 (1H, m, Ar), 7.55-7.49 (2H, m, Ar), 3.93 (1H, dd,  $J$  = 5.3, 3.3 Hz, C<sub>2</sub>H), 2.70 (1H, dd,  $J$  = 3.3, 1.5 Hz, C<sub>3</sub>H), 2.53 (1H, dd,  $J$  = 5.3, 1.5 Hz, C<sub>3</sub>H), 1.44 (9H, s, *t*-Bu). <sup>13</sup>C NMR (101 MHz, CDCl<sub>3</sub>)  $\delta$  193.8, 160.4, 136.7, 134.0, 128.9, 128.7, 82.2, 37.6, 32.7, 28.0. HRMS (EI) [2M+Na]<sup>+</sup>, found 517.2321. C<sub>28</sub>H<sub>34</sub>N<sub>2</sub>O<sub>6</sub>Na requires 517.2315. Anal. Calcd for C<sub>14</sub>H<sub>17</sub>NO<sub>3</sub>: C 68.00, H 6.93, N 5.66%. Found: C 68.01, H 6.90, N 5.54%.

**Aziridine-2-yl-phenyl-methanone (8) [20]:**

Prepared after general procedure from amide **4b** (0.50 g, 2.33 mmol), PhLi (2.00 M solution in toluene), 20 mL THF. Reaction time 1 h. Yield 0.22 g, 66% (4 eq, 9.32 mmol, 1.17 mL PhLi, warmed to RT; Table 3, entry 7); 0.12 g, 35% (4 eq, 9.32 mmol, 4.68 mL PhLi; Table 4, entry 6). Title compound **8** was isolated by column chromatography on 300 mL silica with PE-EtOAc (1:1) eluent as a colourless oil,  $R_f$  = 0.2 (PE-EtOAc, 1:1). <sup>1</sup>H NMR (400 MHz, CDCl<sub>3</sub>)  $\delta$  8.09-7.98 (2H, m, Ar), 7.69-7.20 (3H, m, Ar), 3.47 (1H, dd,  $J$  = 5.7, 2.9 Hz, C<sub>2</sub>H), 2.02 (1H, br s, NH), 2.04 (1H, dd,  $J$  = 5.7, 1.4 Hz, C<sub>3</sub>H), 1.97-1.86 (1H, m, C<sub>3</sub>H). LC-MS  $m/z$  170 [M+Na]<sup>+</sup>.

**Diphenyl-(1-*tert*-butyloxycarbonylaziridine-2-yl)-methanol (9):**

Prepared after general procedure from ester **1c** (0.50 g, 2.33 mmol), PhLi (2.00 M solution in toluene), 20 mL THF. Yield 0.03 g, 5% (1 h, 1 eq, 2.33 mmol, 1.17 mL PhLi; Table 4, entry 1); 0.24 g, 40% (1 h, 2 eq, 4.66 mmol, 2.34 mL PhLi; Table 4, entry 2); 0.30 g, 52% (1 h, 4 eq, 9.32 mmol, 4.68 mL PhLi; Table 4, entry 3); 0.03 g, 5% (12 h, 4 eq, 9.32 mmol, 4.68 mL PhLi; Table 4, entry 4); 0.01 g, 2% (12 h, 4 eq, 9.32 mmol, 4.68 mL PhLi; warmed to RT before quenching; Table 4, entry 5). From ketone **7a** (0.40 g, 1.62 mmol), PhLi (2.00 M solution in toluene, 0.81 mL, 1.62 mmol), 10 mL THF. Reaction time 1 h. Yield 0.32 g, 61%. Title compound **9** was isolated by column chromatography on 150 mL silica with PE-EtOAc (4:1) eluent as a white crystalline solid, mp 111°C,  $R_f$  = 0.6 (PE-EtOAc, 4:1). IR (CHCl<sub>3</sub>) 3510, 3063, 3027, 2979, 2931, 1716, 1448, 1369, 1308, 1160, 699 cm<sup>-1</sup>. <sup>1</sup>H NMR (400 MHz, CDCl<sub>3</sub>)  $\delta$  7.70-7.65 (2H, m, Ar), 7.40-7.23 (8H, m, Ar), 3.38 (1H, dd,  $J$  = 6.3, 3.7 Hz, C<sub>2</sub>H), 2.77 (1H, s, OH); 2.36 (1H, unresolved dd,  $J$  = 3.7 Hz, C<sub>3</sub>H), 2.26 (1H, unresolved dd,  $J$  = 6.3 Hz, C<sub>3</sub>H), 1.45 (9H, s, *t*-Bu). <sup>13</sup>C NMR (101 MHz, CDCl<sub>3</sub>)  $\delta$  162.2, 146.0, 144.2, 128.3, 127.4, 126.3, 82.1, 75.0, 44.3, 28.3, 28.0. LC-MS  $m/z$  348 [M+Na]<sup>+</sup>. Anal. Calcd for C<sub>26</sub>H<sub>23</sub>NO<sub>3</sub>: C 73.82, H 7.12, N 4.30%. Found: C 73.34, H 7.04, N 4.21%.

**Aziridine-2-yl-diphenyl-methanol (10):**

Prepared after general procedure from ester **1c** (0.50 g, 2.33 mmol), PhLi (2.00 M solution in toluene, 4 eq, 9.32 mmol, 4.66 mL), 20 mL THF. Reaction time 12 h. Yield 0.09 g, 22% (Table 5, entry 4); 0.06 g, 15% (warmed to RT, Table 5, entry 5). From carbinol **9** (0.10 g, 0.29 mmol), PhLi (2.00 M solution in toluene, 4 eq, 1.16 mmol, 0.58 mL), 10 mL THF. Reaction time 1 h. Yield 0.03 g, 44%. Title compound **10** was isolated by column chromatography on 20 mL silica with PE-EtOAc (4:1) eluent as a white crystalline solid, mp 135°C,  $R_f$  = 0.2 (PE-EtOAc, 4:1). IR (CHCl<sub>3</sub>) 3265, 3057, 3031, 2756, 1490, 1448, 1195, 863, 771, 751, 700 cm<sup>-1</sup>. <sup>1</sup>H NMR (400 MHz, CDCl<sub>3</sub>)  $\delta$  7.48-7.40 (4H, m, Ar), 7.36-7.20 (6H, m, Ar), 3.51 (1H, br s, OH); 2.97-2.87 (1H, m, C<sub>2</sub>H), 1.88 (1H, unresolved dd,  $J$  = 5.8 Hz, C<sub>3</sub>H), 1.74 (1H, unresolved dd,  $J$  = 3.6 Hz, C<sub>3</sub>H), 1.56 (1H, br s, NH). <sup>13</sup>C NMR (101 MHz, CDCl<sub>3</sub>)  $\delta$  128.4, 128.3, 127.3, 126.7, 126.5. LC-MS  $m/z$  248 [M+Na]<sup>+</sup>. Anal. Calcd for C<sub>15</sub>H<sub>15</sub>NO: C 79.97, H 6.71, N 5.99%. Found: C 79.64, H 6.72, N 5.99%.

**(1-Benzyl-2-oxo-2-phenyl-ethyl) carbaminic acid *tert*-butyl ester (11) [21]:**

Prepared after general procedure from ester **1c** (0.50 g, 1.80 mmol), PhLi (2.00 M solution in toluene, 7.20 mmol, 3.60 mL), 20 mL THF. Reaction mixture was stirred for 12 h at -78°C, then warmed to the room temperature. Yield 0.05 g, 9%. Title compound **11** was isolated by column chromatography on 200 mL silica with PE-EtOAc (7:1) eluent as a white amorphous solid,  $R_f$  = 0.3 (PE-EtOAc, 1:1).  $^1\text{H}$  NMR (400 MHz,  $\text{CDCl}_3$ )  $\delta$  7.46-7.23 (10H, m, Ar), 4.80-4.59 (1H, m, NH); 3.60 (1H, dd,  $J$  6.9, 4.3 Hz,  $\text{C}_2\text{H}$ ), 3.53-3.32 (1H, m,  $\text{C}_3\text{H}$ ), 2.90-2.71 (1H, m,  $\text{C}_3\text{H}$ ), 1.43 (9H, s). LC-MS  $m/z$  348  $[\text{M}+\text{Na}]^+$ .

## References

1. Singh, G.S. Advances in the synthesis and chemistry of aziridines. *Adv. Heterocyc. Chem.*, **2019**, 129, 245-335. DOI: 10.1016/bs.aihch.2018.12.003
2. Macha, L.; D'hooghe, M.; Ha, H-J. Deployment of Aziridines for the Synthesis of Alkaloids and Their Derivatives. *Synthesis*, **2019**, 51, 1491-1515. DOI: 10.1055/s-0037-1611715
3. Pellissier, H. Recent Developments in Asymmetric Aziridination. *Adv. Synth. Catal.*, **2014**, 356, 1899-1935. DOI: 10.1002/adsc.201400312
4. Strumfs, B.; Uljanovs, R.; Velikijs, K.; Trapencieris, P.; Strumfa, I. 3-Arylaziridine-2-carboxylic Acid Derivatives and (3-Arylaziridin-2-yl)ketones: The Aziridination Approaches. *Int. J. Mol. Sci.* **2021**, 22(18), 9861- 9904. DOI: 10.3390/ijms22189861
5. Zhou, Z.; Kürti, L. Electrophilic Amination: An Update. *Synlett*, **2019**, 30, 1525-1535. DOI: 10.1055/s-0037-1611861
6. Degennaro, L.; Trinchera, P.; Luisi, R. Recent Advances in the Stereoselective Synthesis of Aziridines. *Chem. Rev.*, **2014**, 114, 7881-7929. DOI: 10.1021/cr400553c
7. Yudin, A.K., Ed. Aziridines and Epoxides in Organic Synthesis. Weinheim: Wiley-VCH, **2006**, 492 pp. DOI: 10.1002/3527607862
8. Shtrumfs, B.; Hermene, J.; Kalvinsh, I.; Trapencieris, P. Unnatural amino acids. 3. Aziridinyl ketones from esters and amides of aziridine-2-carboxylic acid. *Chem. Heterocycl. Comp.*, **2007**, 43, 169-174. DOI: 10.1007/s10593-007-0028-7
9. Adler, M.; Adler, S.; Boche, G. J. Tetrahedral Intermediates in Reactions of Carboxylic Acid Derivatives with Nucleophiles. *Phys. Org. Chem.*, **2005**, 18, 193-209. DOI: 10.1002/poc.807
10. Deyrup, J.A.; Moyer, C.L. Aziridinemethanols. *J. Org. Chem.*, **1970**, 35, 3424-3428. DOI: 10.1021/jo00835a052
11. Yu, L.; Kokai, A.; Yudin, A.K. Preparation and Reactivity of Versatile  $\alpha$ -Amino Ketones. *J. Org. Chem.*, **2007**, 72, 1737-1741. DOI: 10.1021/jo062401o
12. Yun, J.M.; Sim, T.B.; Hahm, H.S.; Lee, W.K. Efficient Synthesis of Enantiomerically Pure 2-Acylaziridines: Facile Syntheses of *N*-Boc-safingol, *N*-Boc-d-erythro-sphinganine, and *N*-Boc-spisulosine from a Common Intermediate. *J. Org. Chem.*, **2003**, 68, 7675-7680. DOI: 10.1021/jo034755a
13. Woydowski, K.; Liebscher, J. Synthesis of Optically Active 3-Amino-2,3-dihydrobenzopyran-4-ones by Ring Transformation of Aziridinecarboxamides. *Synthesis*, **2000**, 1444-1448. DOI: 10.1055/s-2000-7101
14. Rubin, A.E.; Sharpless, K.B. A Highly Efficient Aminohydroxylation Process. *Angew Chem Int Ed*, **1997**, 36, 2637-2640. DOI: 10.1002/anie.199726371
15. Molander, G.A.; Stengel, P.J. Reduction of 2-acylaziridines by samarium (II) iodide. An efficient and regioselective route to  $\beta$ -amino carbonyl compounds. *Tetrahedron*, **1997**, 53, 8887-8912. DOI: 10.1016/S0040-4020(97)90399-9
16. Sureshbabu, P.; Azeez, S.; Muniyappan, N.; Sabiah, S.; Kandasamy, J. Chemoselective Synthesis of Aryl Ketones from Amides and Grignard Reagents via C(O)-N Bond Cleavage under Catalyst-Free Conditions. *J Org Chem*, **2019**, 84, 11823-11838. DOI: 10.1021/acs.joc.9b01699
17. Chan, G.H.; Ong, D.Y.; Yen, Z.; Chiba, S. Reduction of *N,N*-Dimethylcarboxamides to Aldehydes by Sodium Hydride-Iodide Composite. *Helv Chem Acta*, **2018**, 101, e1800049. DOI: 10.1002/hlca.201800049
18. Anthore-Dalion, L.; Benischke, A.D.; Wei, B.; Berionni, G.; Knochel, P. The Halogen-Samarium Exchange Reaction: Synthetic Applications and Kinetics. *Angew Chem Int Ed*, **2019**, 58, 4046-4050. DOI: 10.1002/anie.201814373
19. Nadano, R.; Fuchibe, K.; Ikeda, M.; Takahashi, H.; Ichikawa, J. Rapid and Slow Generation of 1-Trifluoromethylvinylolithium: Syntheses and Applications of  $\text{CF}_3$ -Containing Allylic Alcohols, Allylic Amines, and Vinyl Ketones. *Chem Asian J*, **2010**, 5, 1875-1883. DOI: 10.1002/asia.201000139
20. Liu, Z.; Liu, J.; Zhang, L.; Liao, P.; Song, J.; Bi, X. Silver(I)-catalyzed hydroazidation of ethynyl carbinols: synthesis of 2-azidoallyl alcohols. *Angew. Chem., Int. Ed. Engl.* **2014**, 53, 5305-5309. DOI: 10.1002/anie.201310264

21. Yang, H.; Li, H.; Wittenberg, R.; Egi, M.; Huang, W.; Liebeskind, L.S. Ambient Temperature Synthesis of High Enantiopurity *N*-Protected Peptidyl Ketones by Peptidyl Thiol Ester–Boronic Acid Cross-Coupling. *J. Am. Chem. Soc.* **2007**, *129*, 1132–1140. DOI: 10.1021/ja0658719
22. Strumfs, B.; Hermane, J.; Belyakov, S.; Trapencieris, P. Acyl migration from N to C in aziridine-2-carboxylic esters. *Tetrahedron*, **2014**, *70*, 355–362. DOI: 10.1016/j.tet.2013.11.052
23. Shtrumfs, B.; Chernyak D.; Kums, I.; Kalvins, I.; Trapencieris, P. Unnatural amino acids. 2. Simple method for obtaining esters of aziridine-2-carboxylic acids by transesterification reaction. *Chem. Heterocycl. Comp.* **2004**, *40*, 725–733. DOI: 10.1023/B:COHC.0000040767.96090.cc
24. Ivanova, J.; Štrumfs, B.; Žalubovskis, R. Access to NH-aziridine-2-carboxamides through Davidsen acylimidodicarbonate activation. *Comptes Rendus Chimie*, **2019**, *22*, 283–293. DOI: 10.1016/j.crci.2019.03.001
25. Altomare, A.; Burla, M.C.; Camalli, M.; Cascarano, G.L.; Giacovazzo, C.; Guagliardi, A.; Moliterni, A.G.G.; Polidori, A.; Spagna, R. SIR97: a new tool for crystal structure determination and refinement. *J. Appl. Crystallogr.* **1999**, *32*, 115–119. DOI: 10.1107/S0021889898007717
26. Sheldrick, G.M. A Short History of SHELX. *Acta Crystallogr.* **2008**, *A64*, 112–122. DOI: 10.1107/S0108767307043931-*tert*-Butyloxycarbonylaziridine-2-carboxylic acid methyl ester 1a

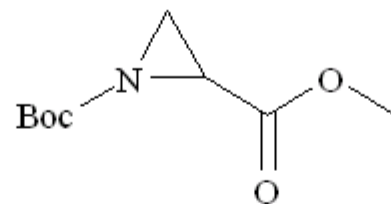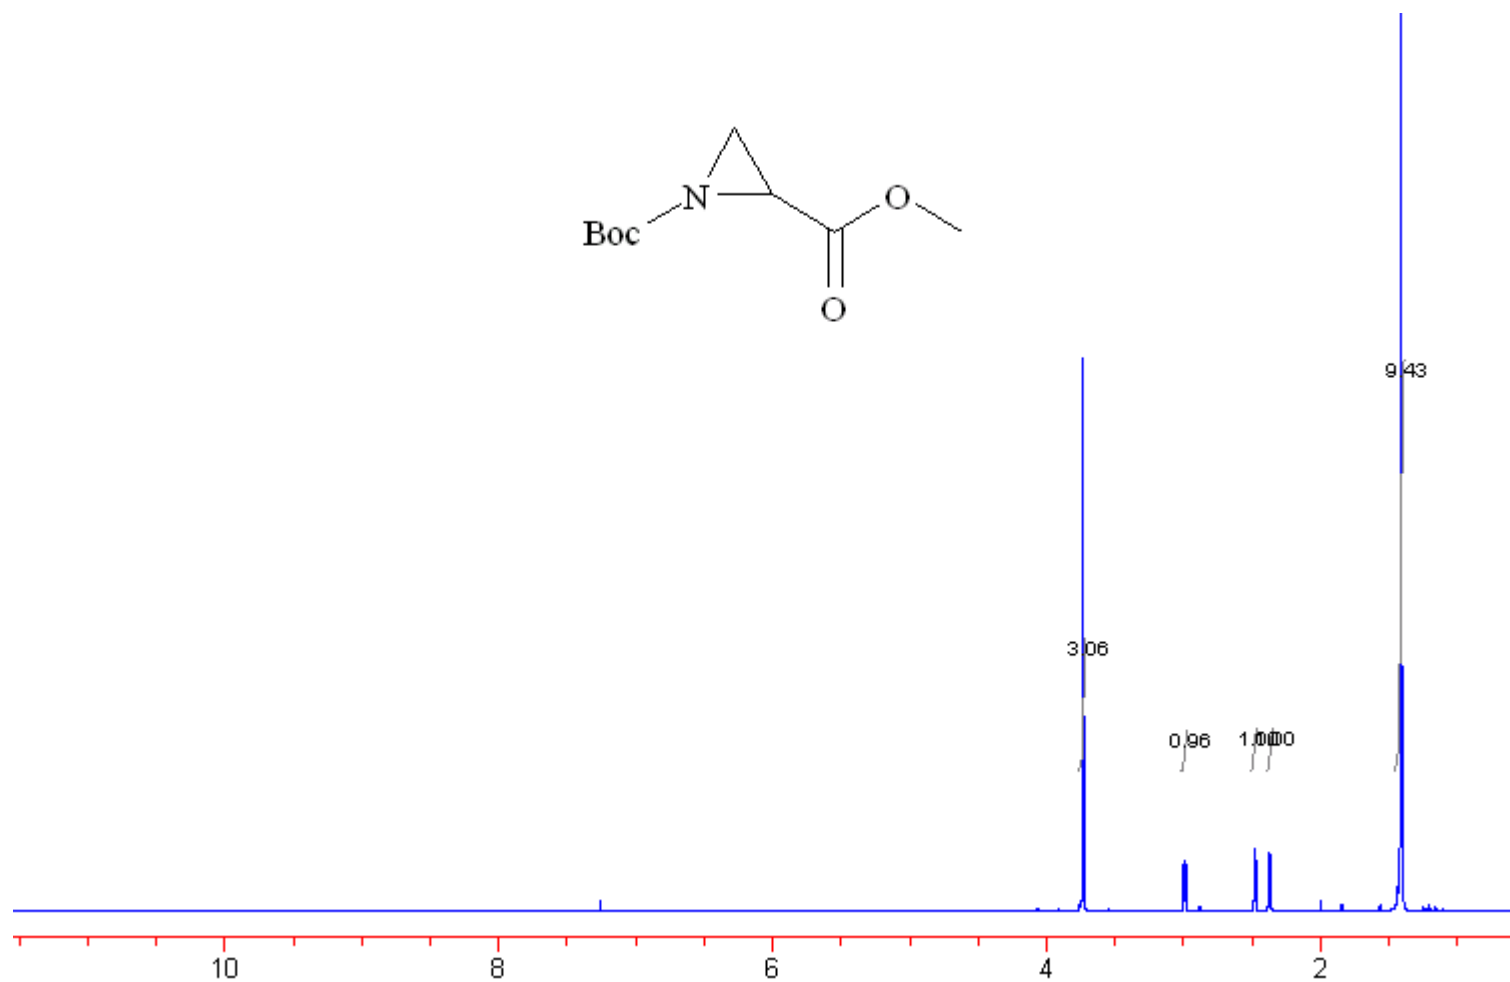

1-*tert*-Butyloxycarbonylaziridine-2-carboxylic acid methyl ester 1a



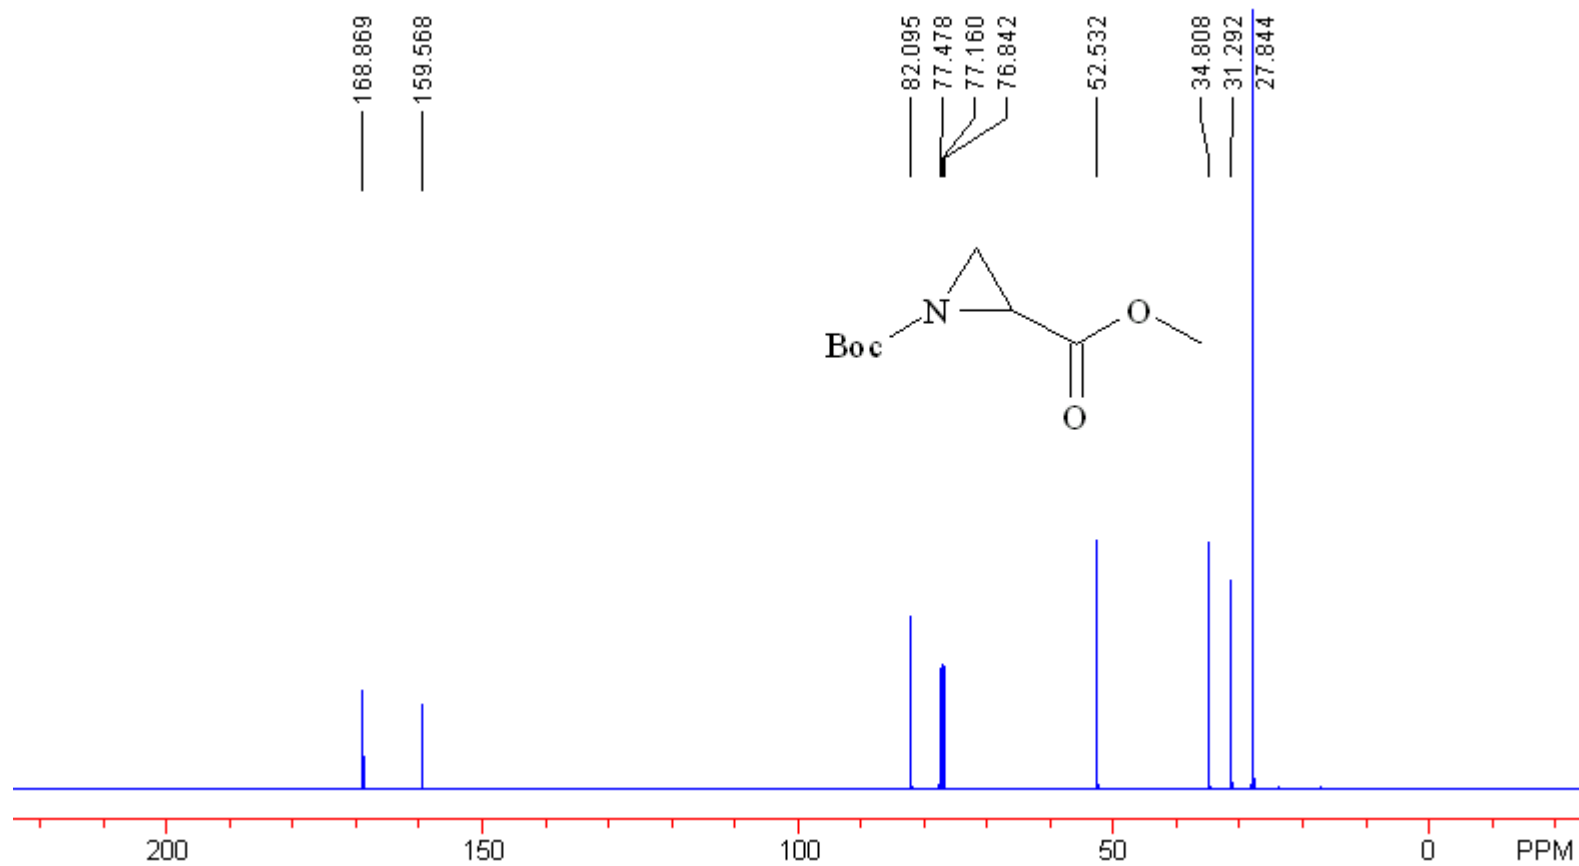

**1-*tert*-Butyloxycarbonylaziridine-2-carboxylic acid methyl ester 1a**

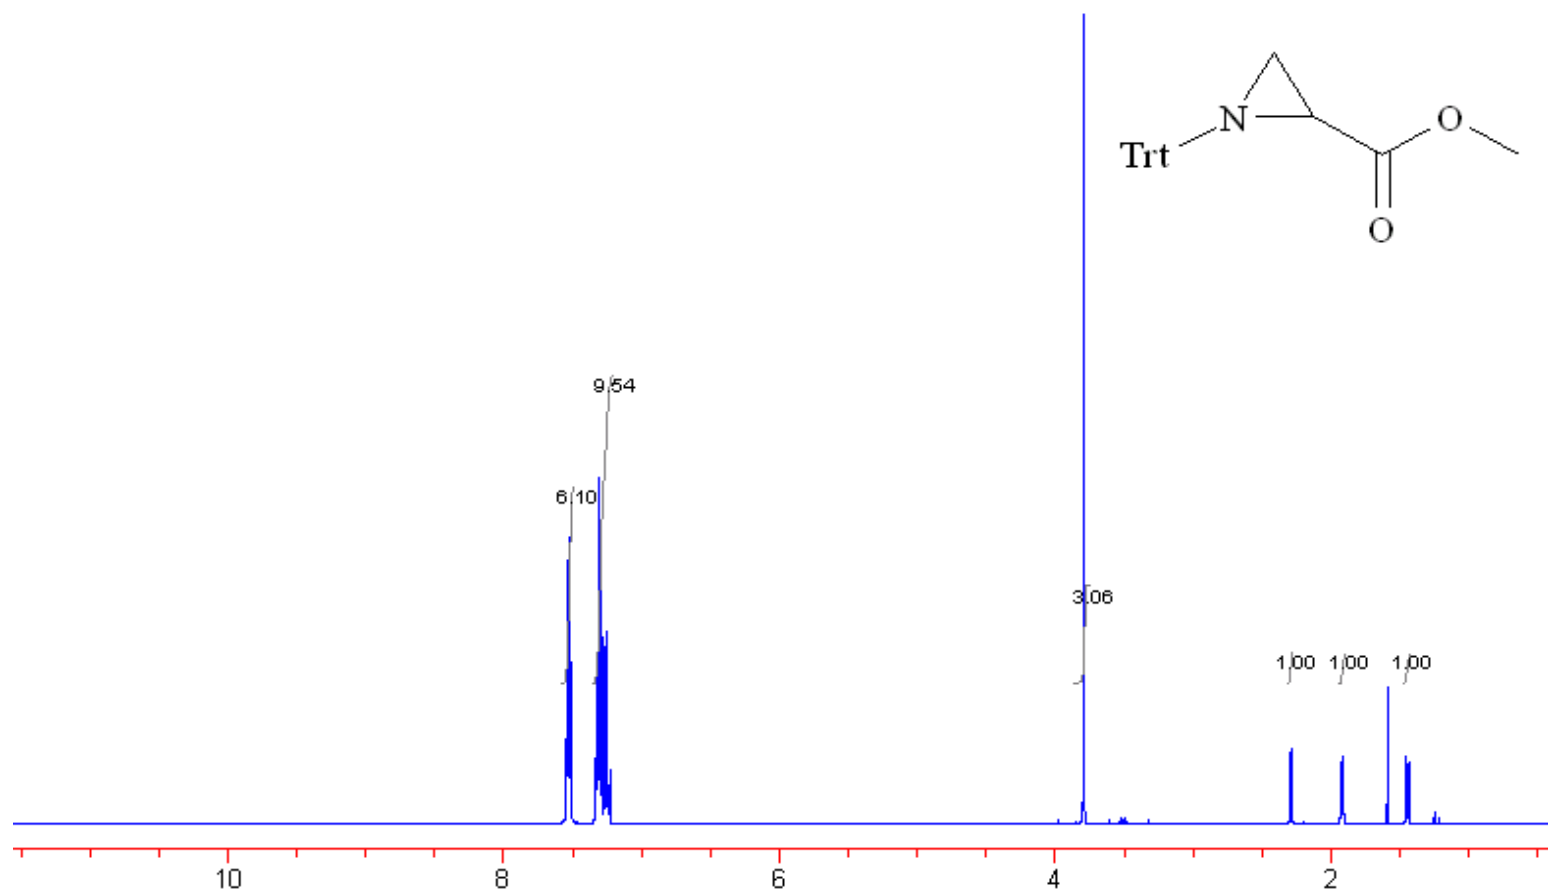

1-Trityl-aziridine-2-carboxylic acid methyl ester 1b

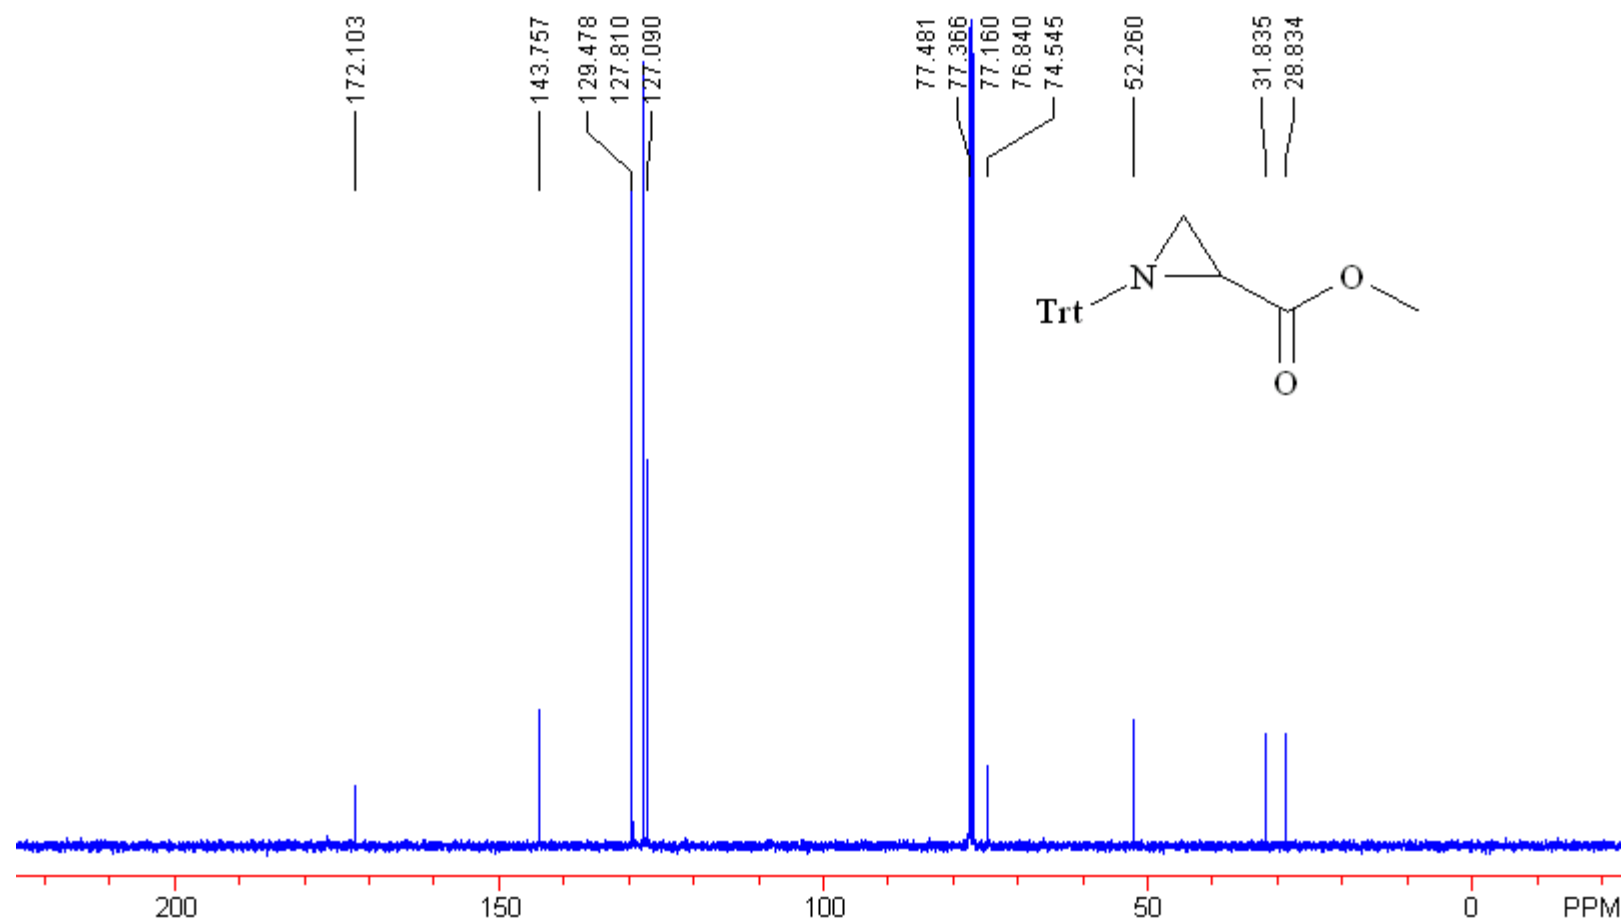

1-Trityl-aziridine-2-carboxylic acid methyl ester 1b

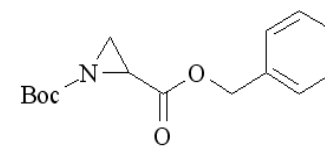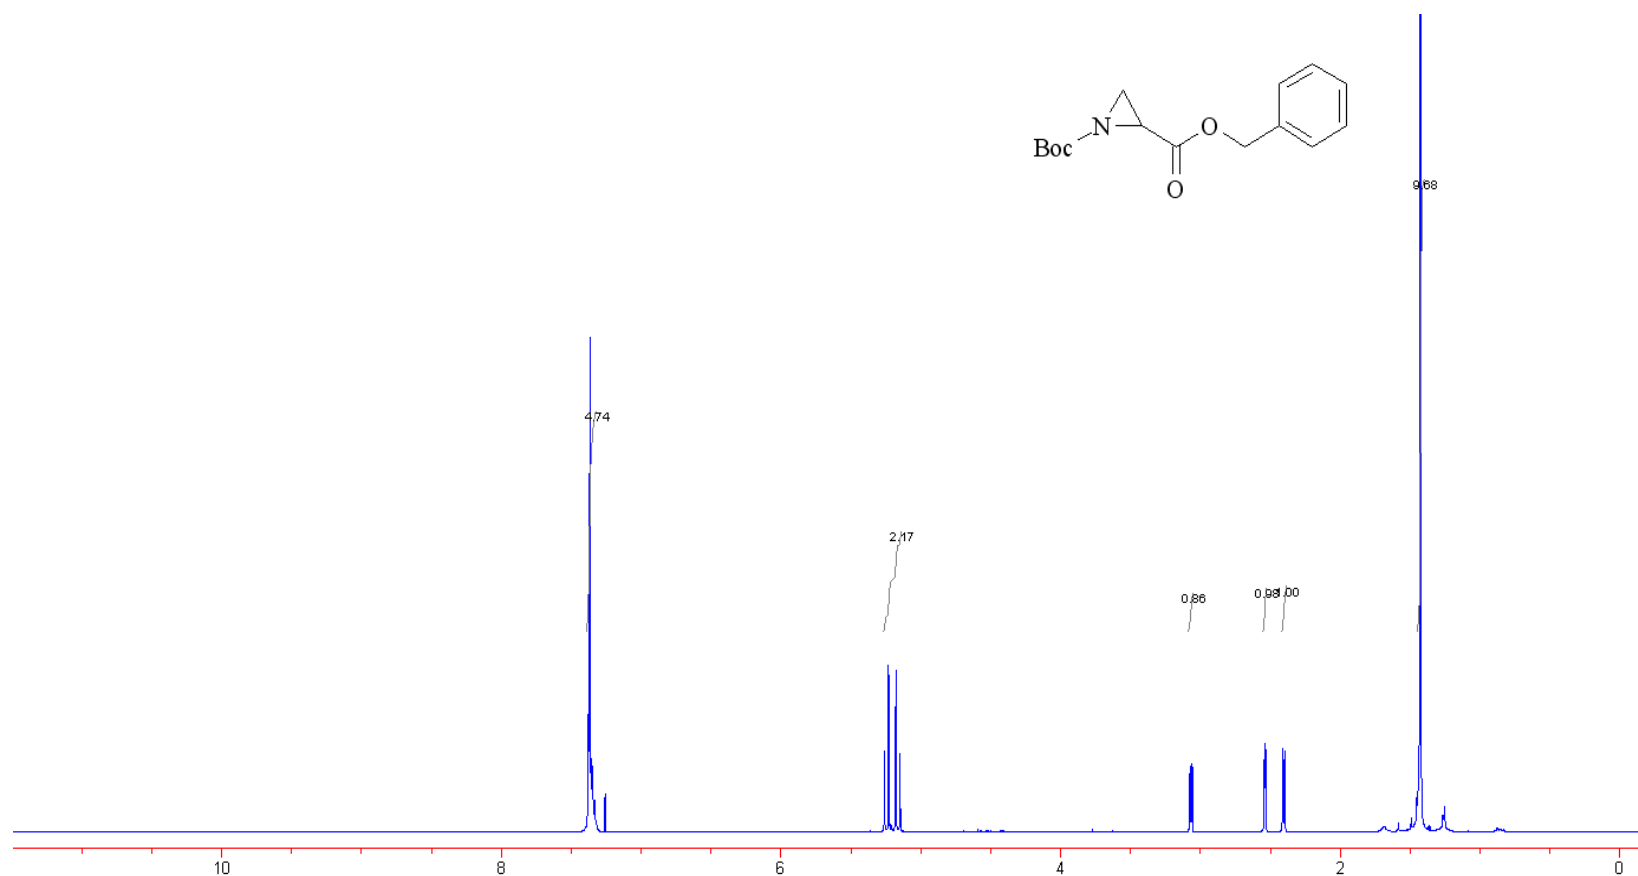

**Aziridine-1,2-dicarboxylic acid 2-benzyl ester 1-*tert*-butyl ester 1c**

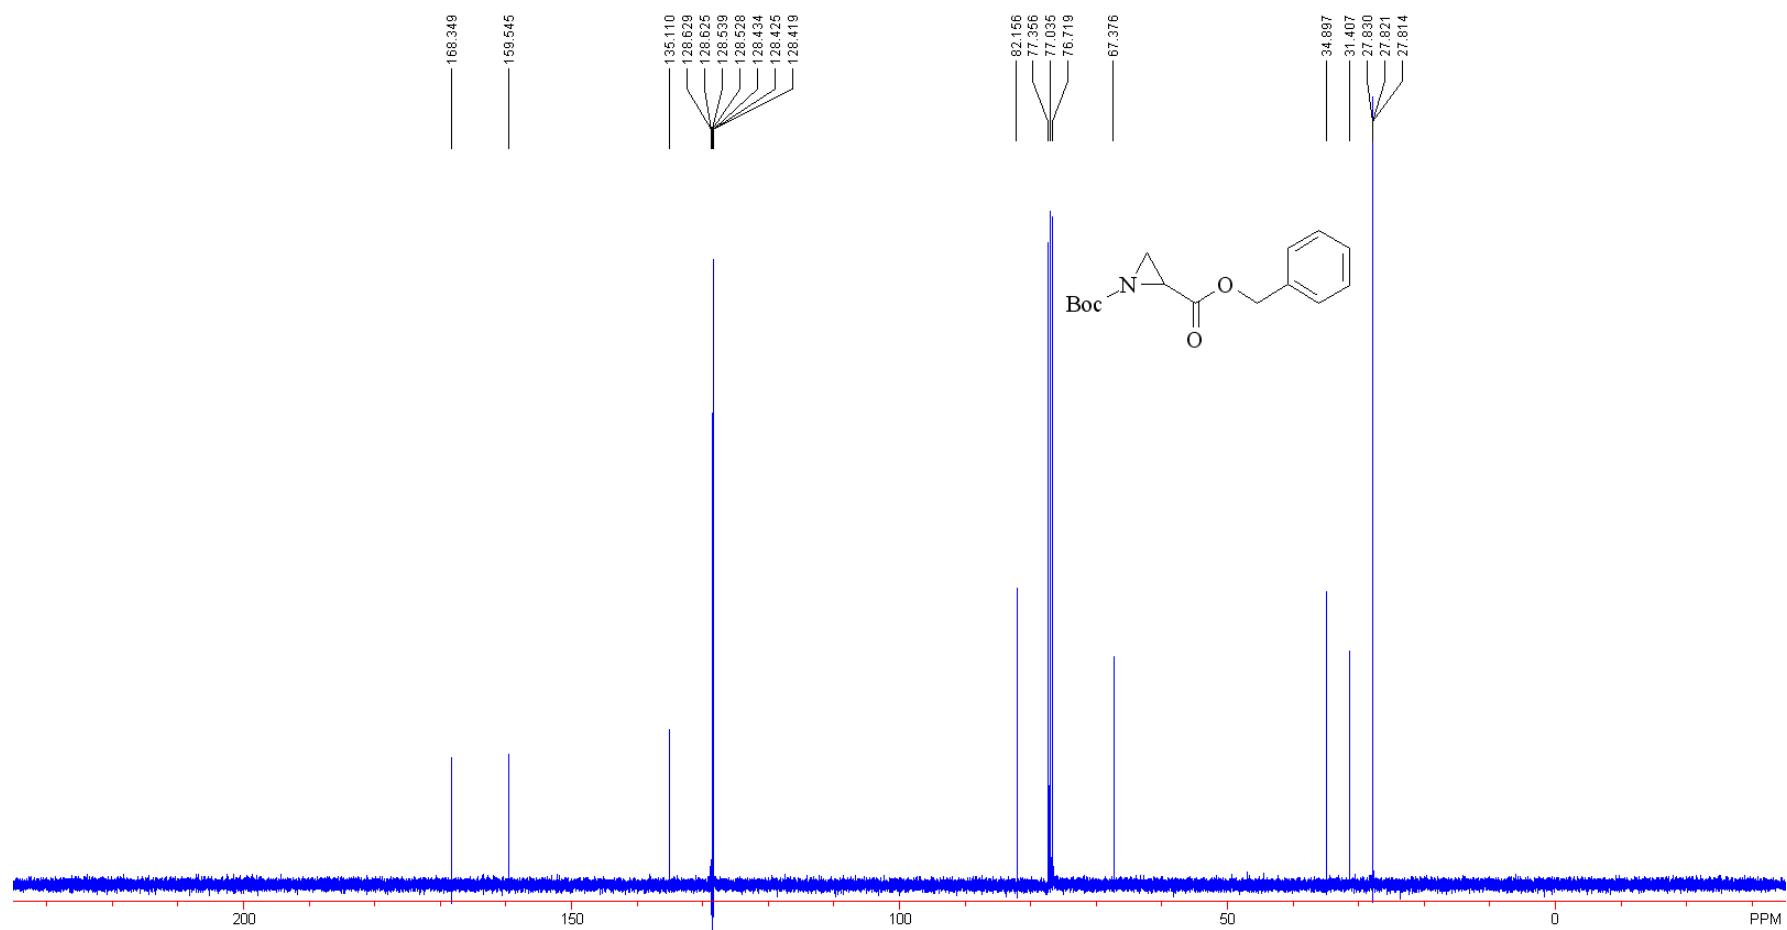

Aziridine-1,2-dicarboxylic acid 2-benzyl ester 1-*tert*-butyl ester 1c



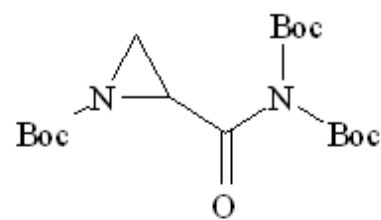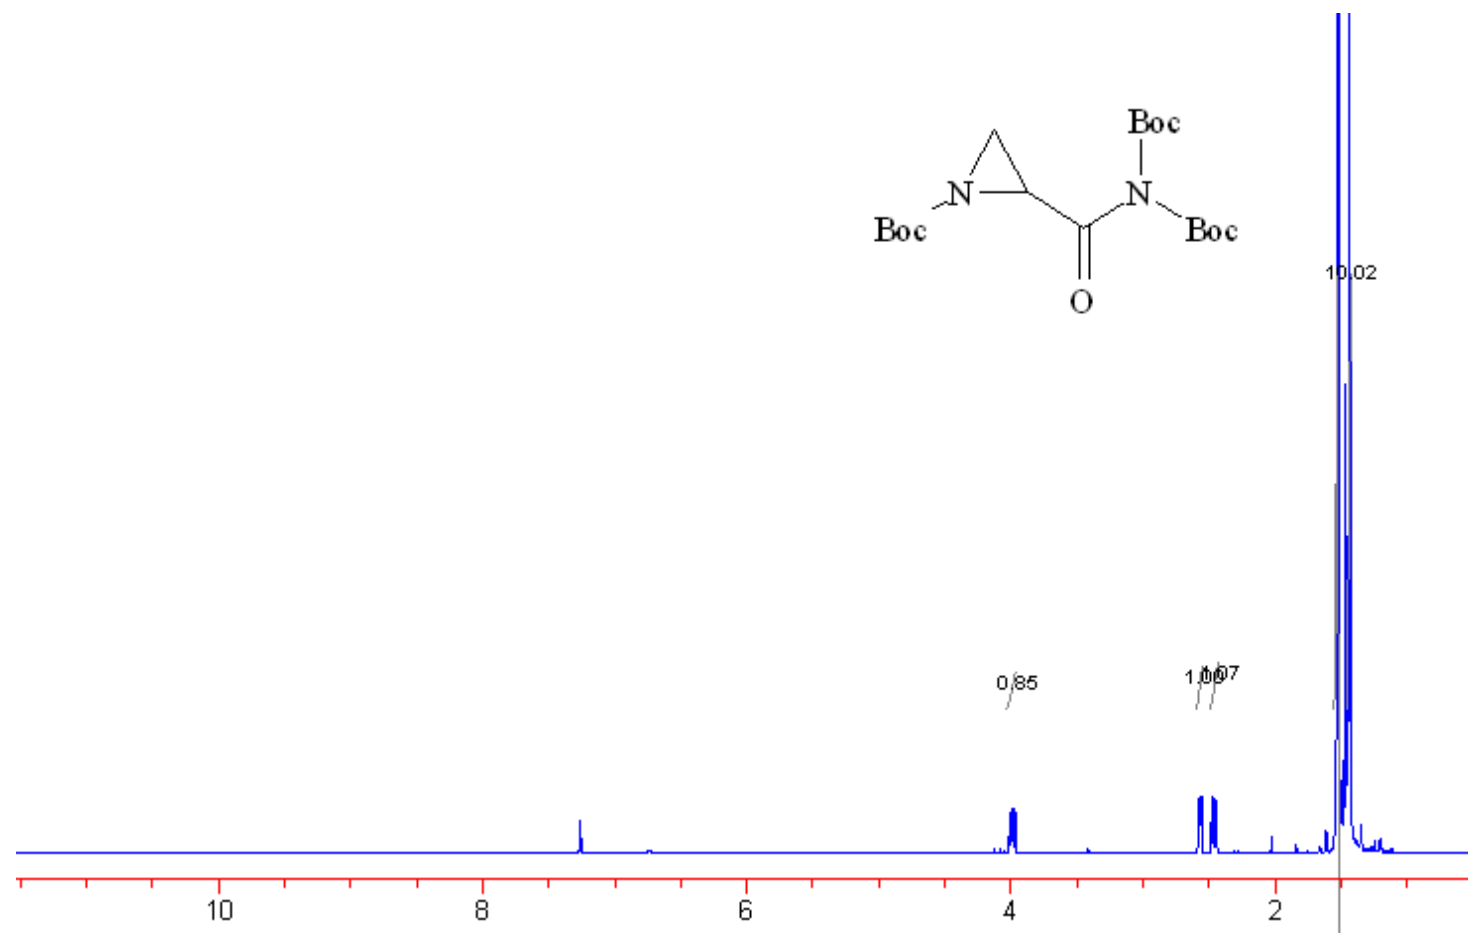

*tert*-Butyl 2-(bis(*tert*-butoxycarbonyl)carbamoyl)aziridine-1-carboxylate 2a

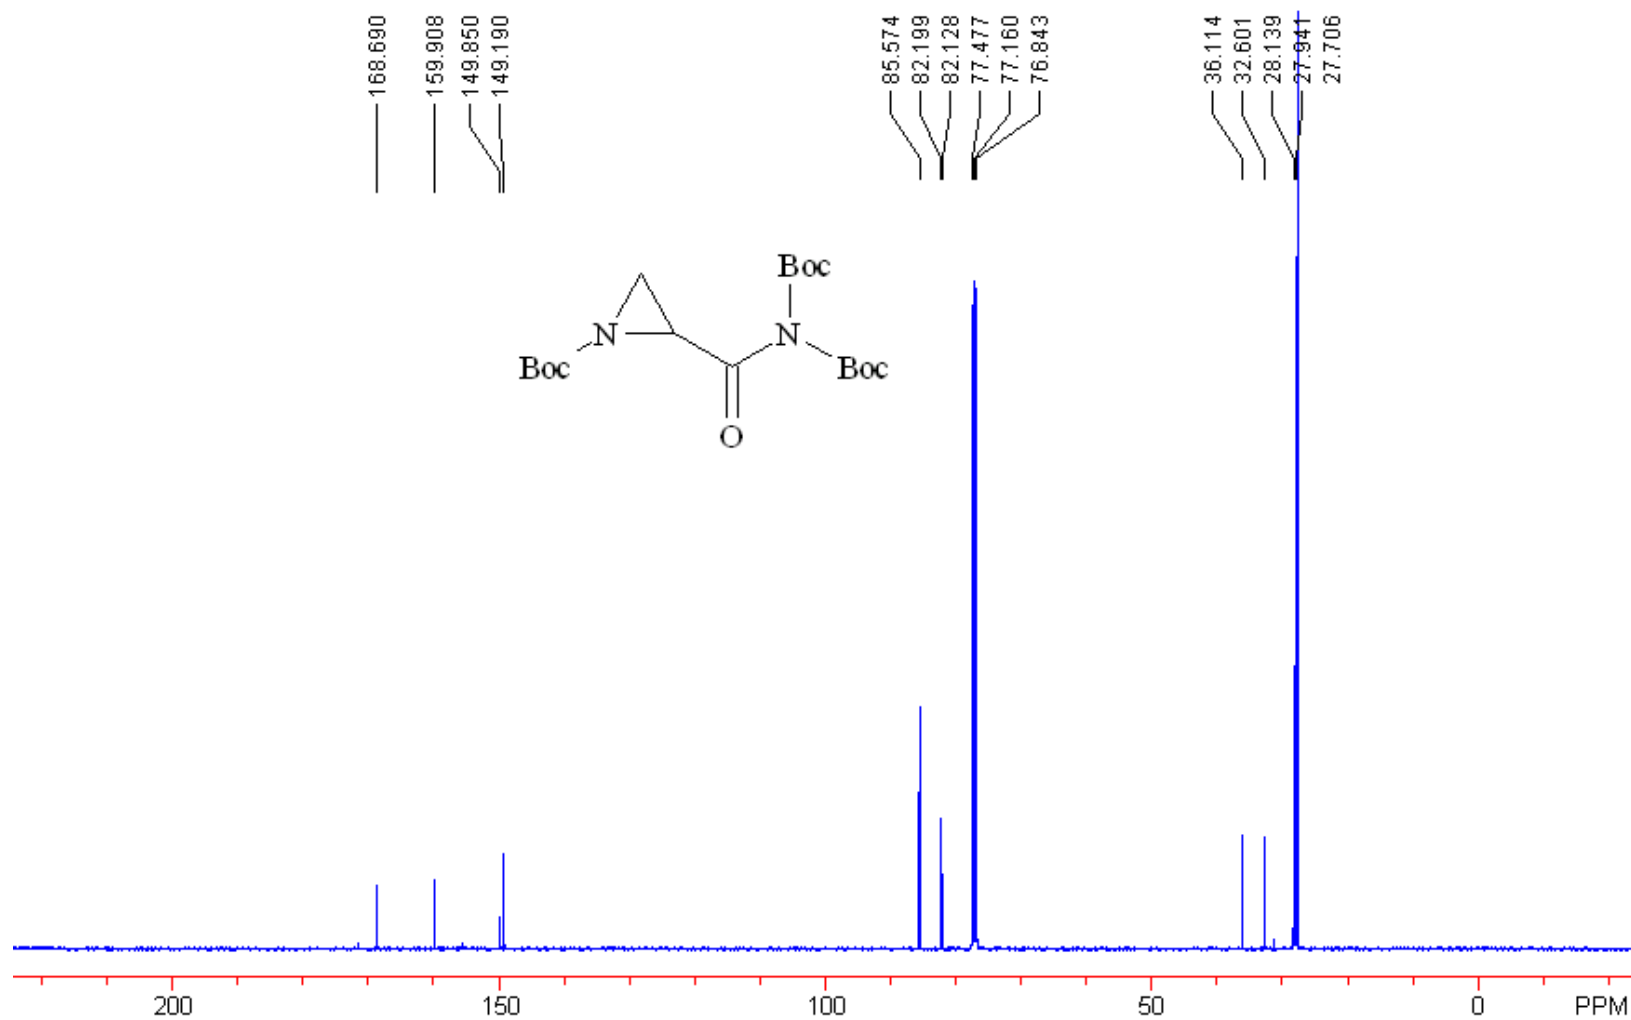

***tert*-Butyl 2-(bis(*tert*-butoxycarbonyl)carbamoyl)aziridine-1-carboxylate 2a**

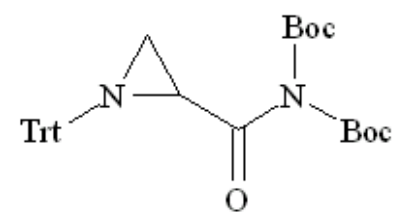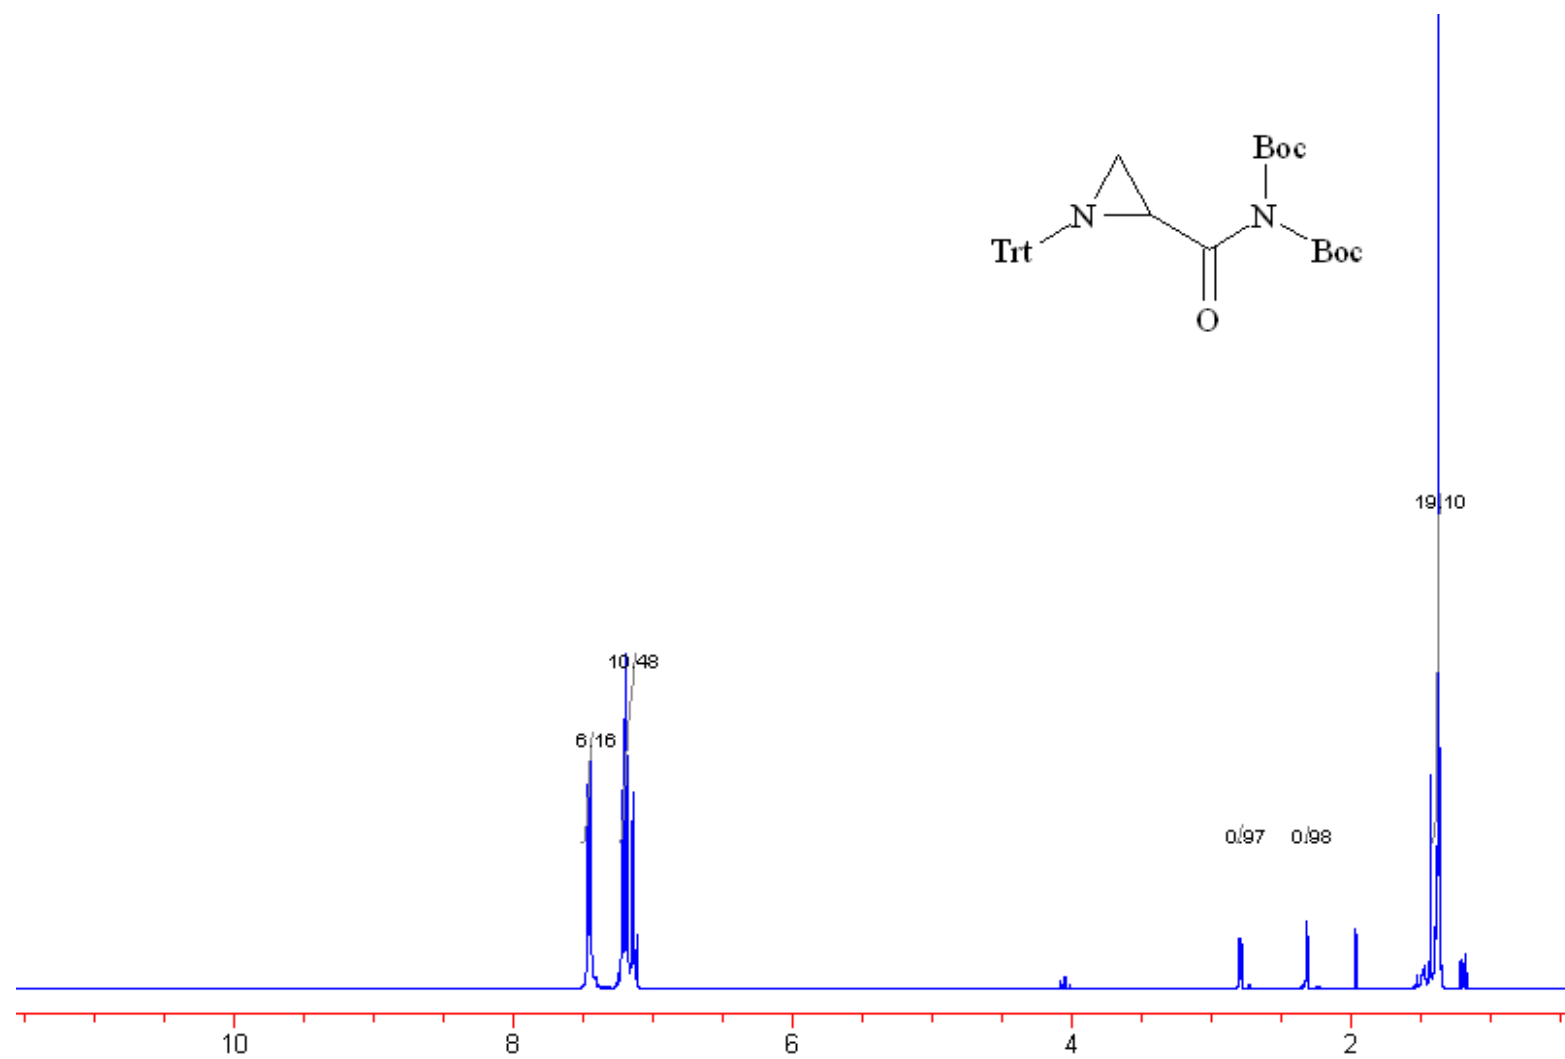

*tert*-Butyl (*tert*-butoxycarbonyl)(1-tritylaziridine-2-carbonyl)carbamate 2b

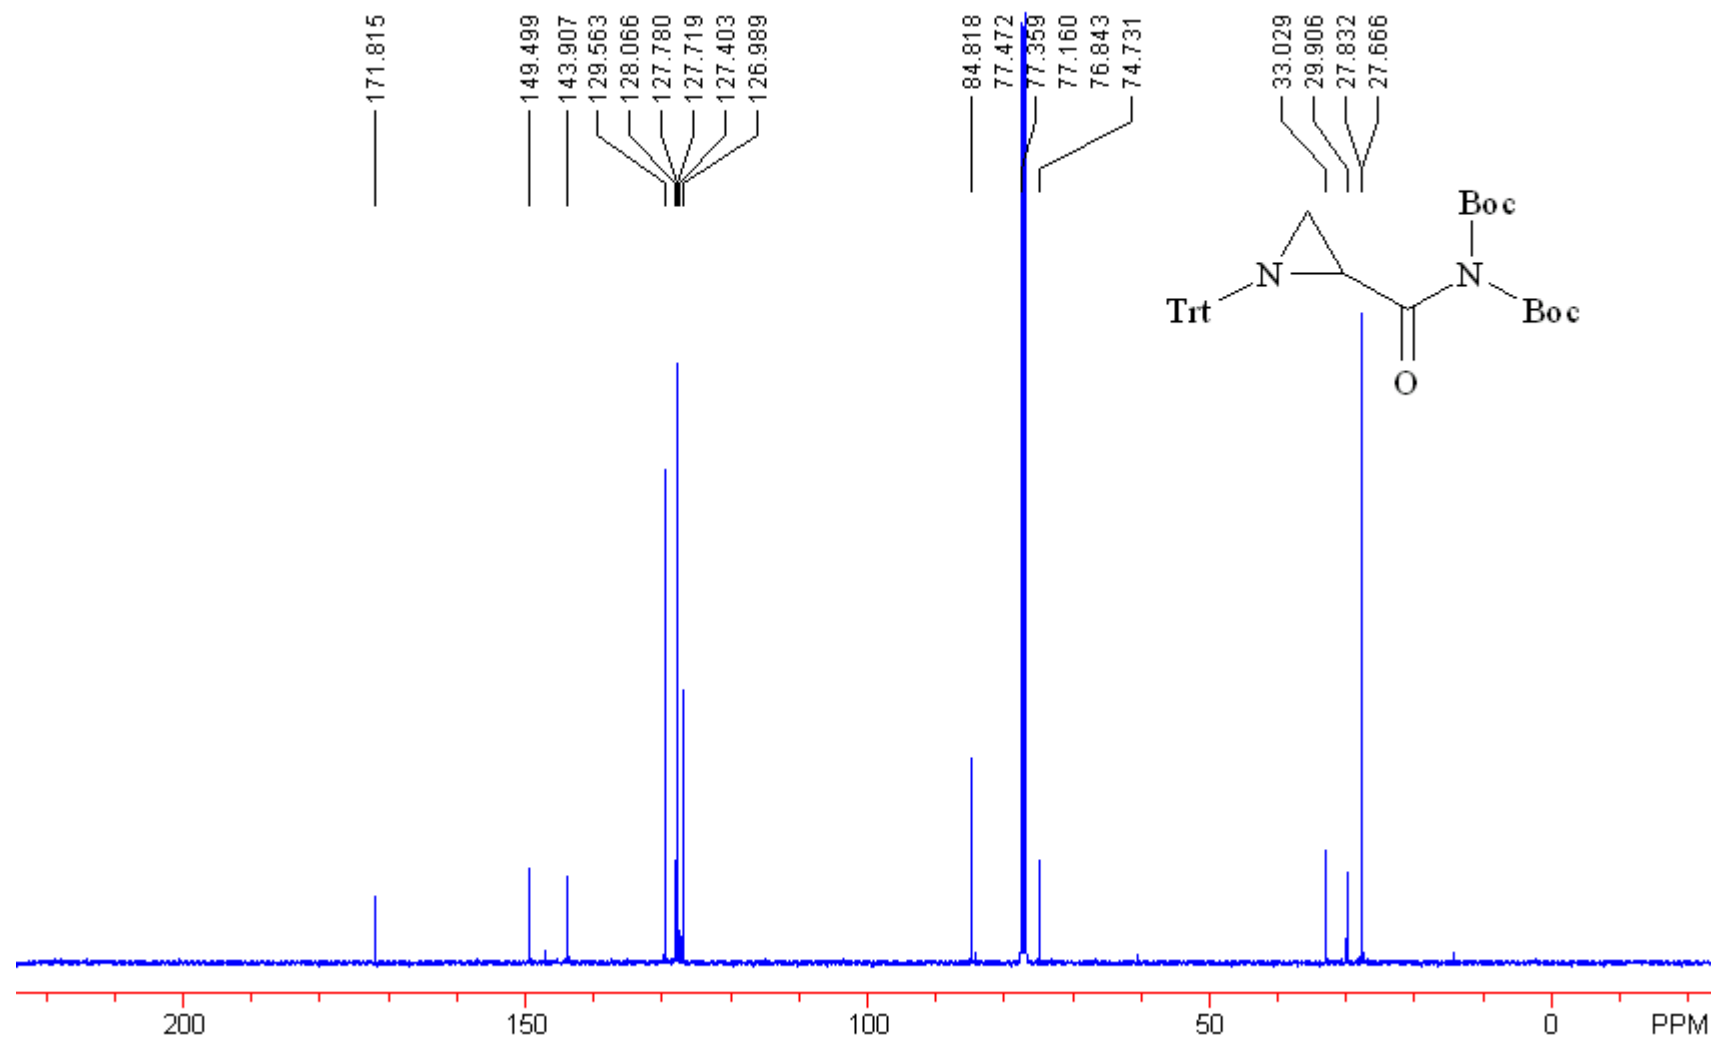

*tert*-Butyl (*tert*-butoxycarbonyl)(1-tritylaziridine-2-carbonyl)carbamate 2b

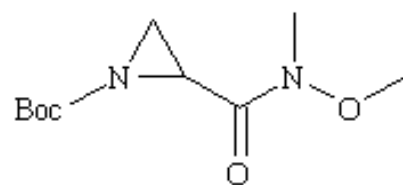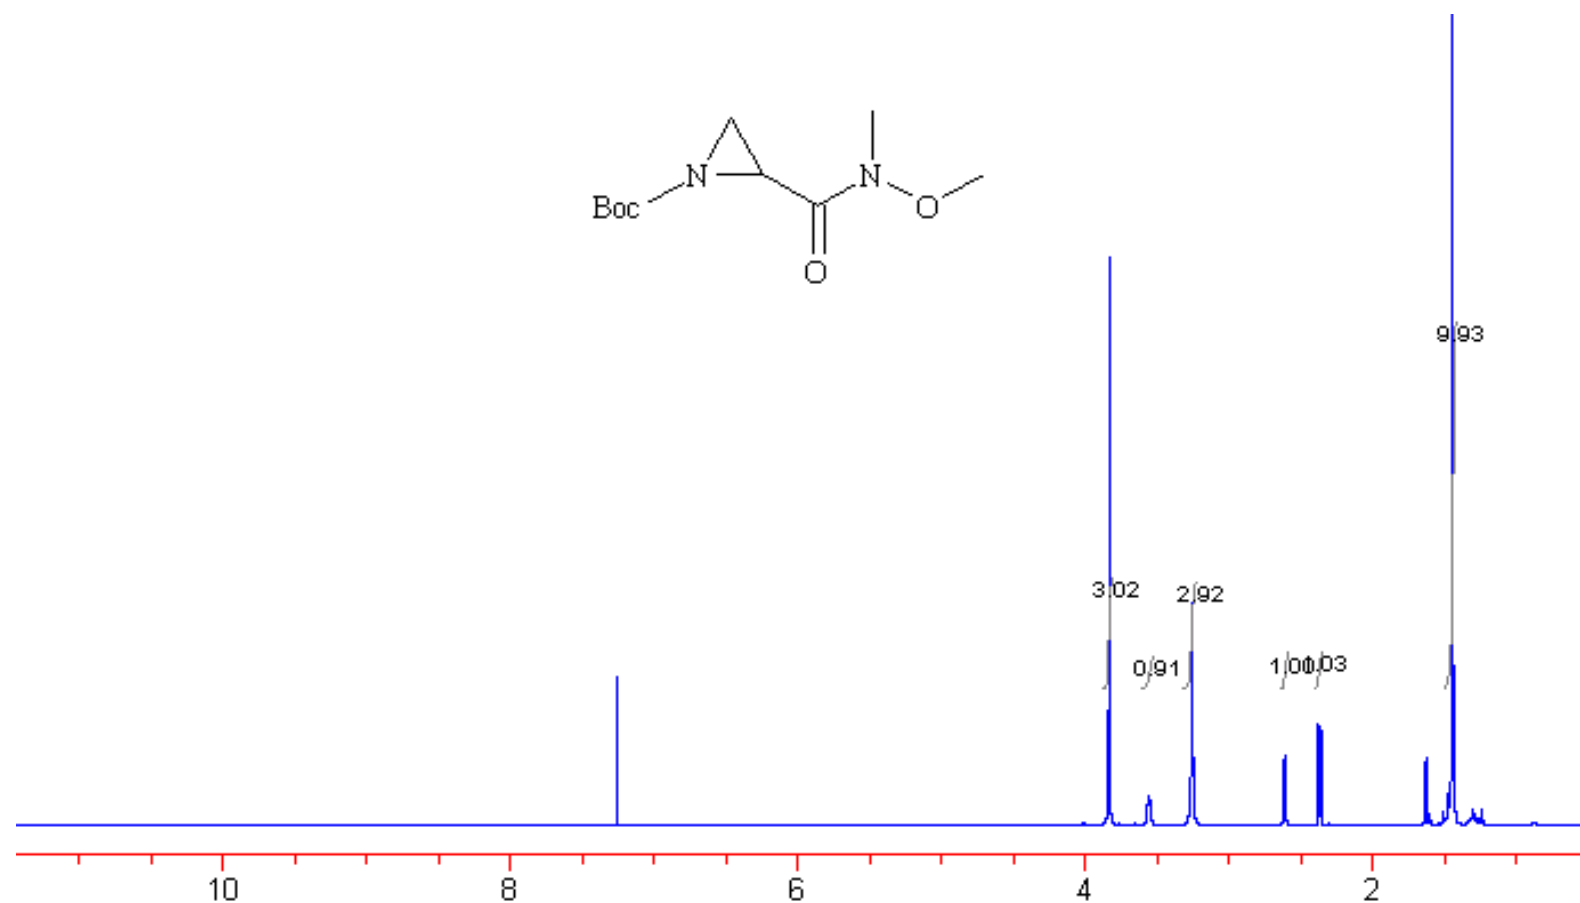

*tert*-Butyl 2-(methoxy(methyl)carbamoyl)aziridine-1-carboxylate 3b



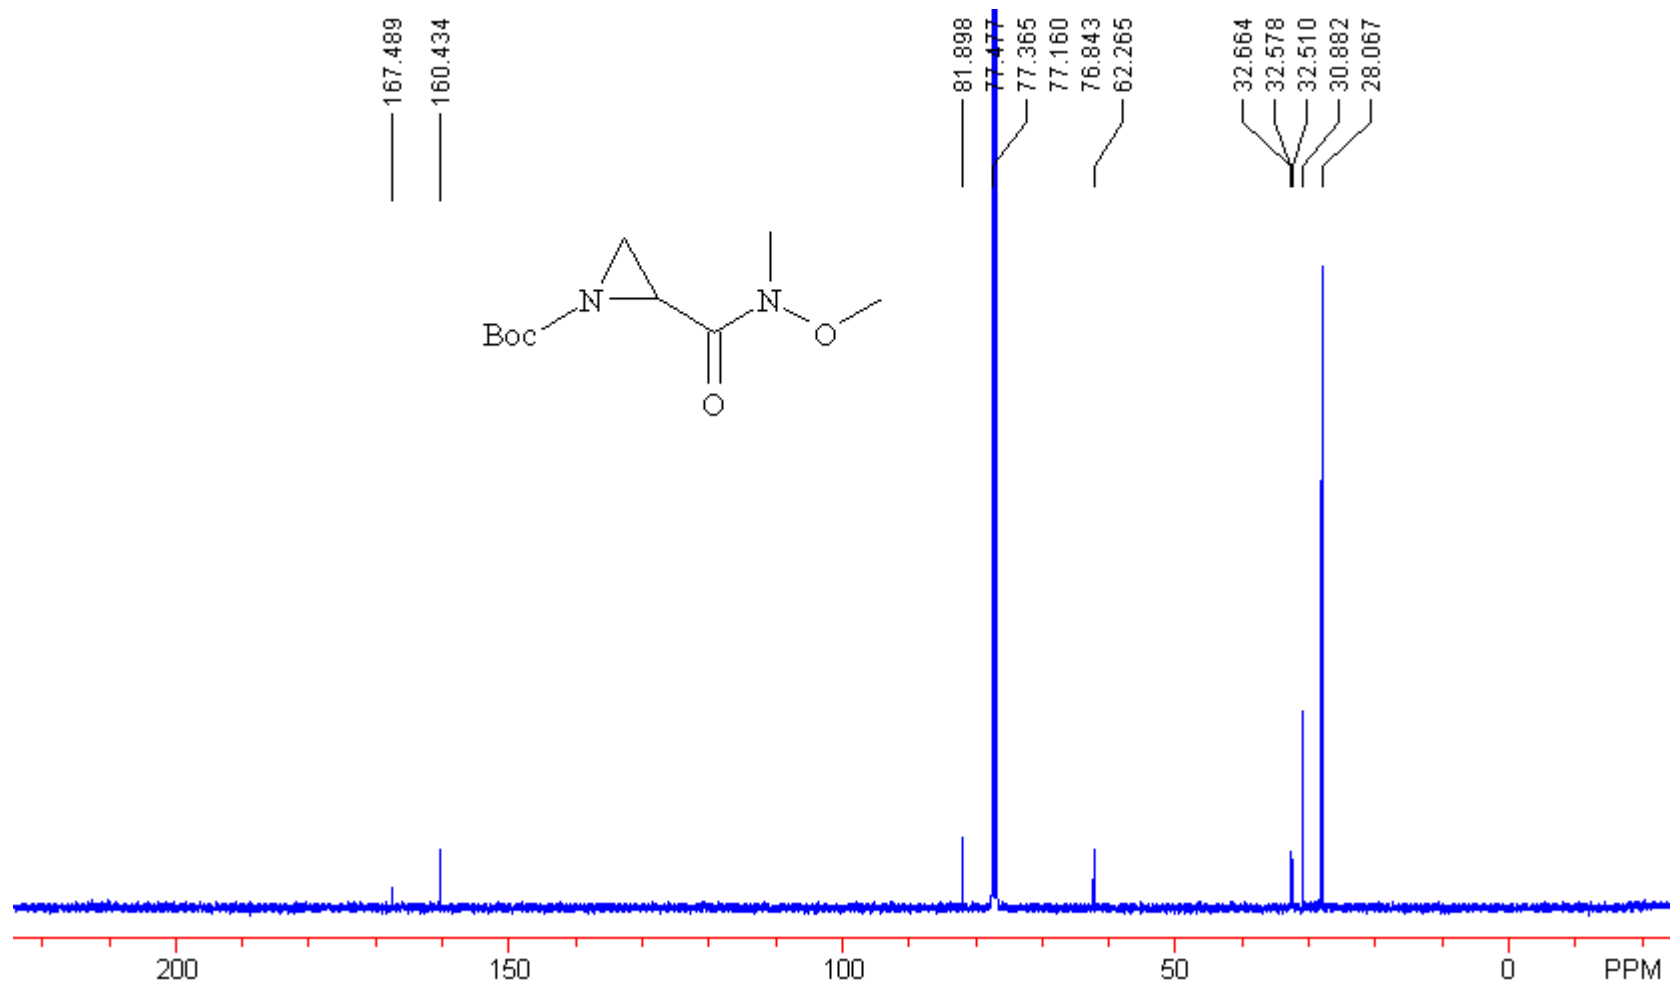

*tert*-Butyl 2-(methoxy(methyl)carbamoyl)aziridine-1-carboxylate 3b

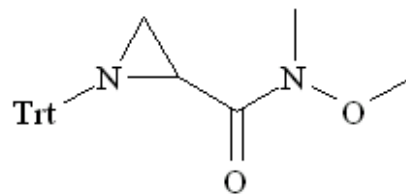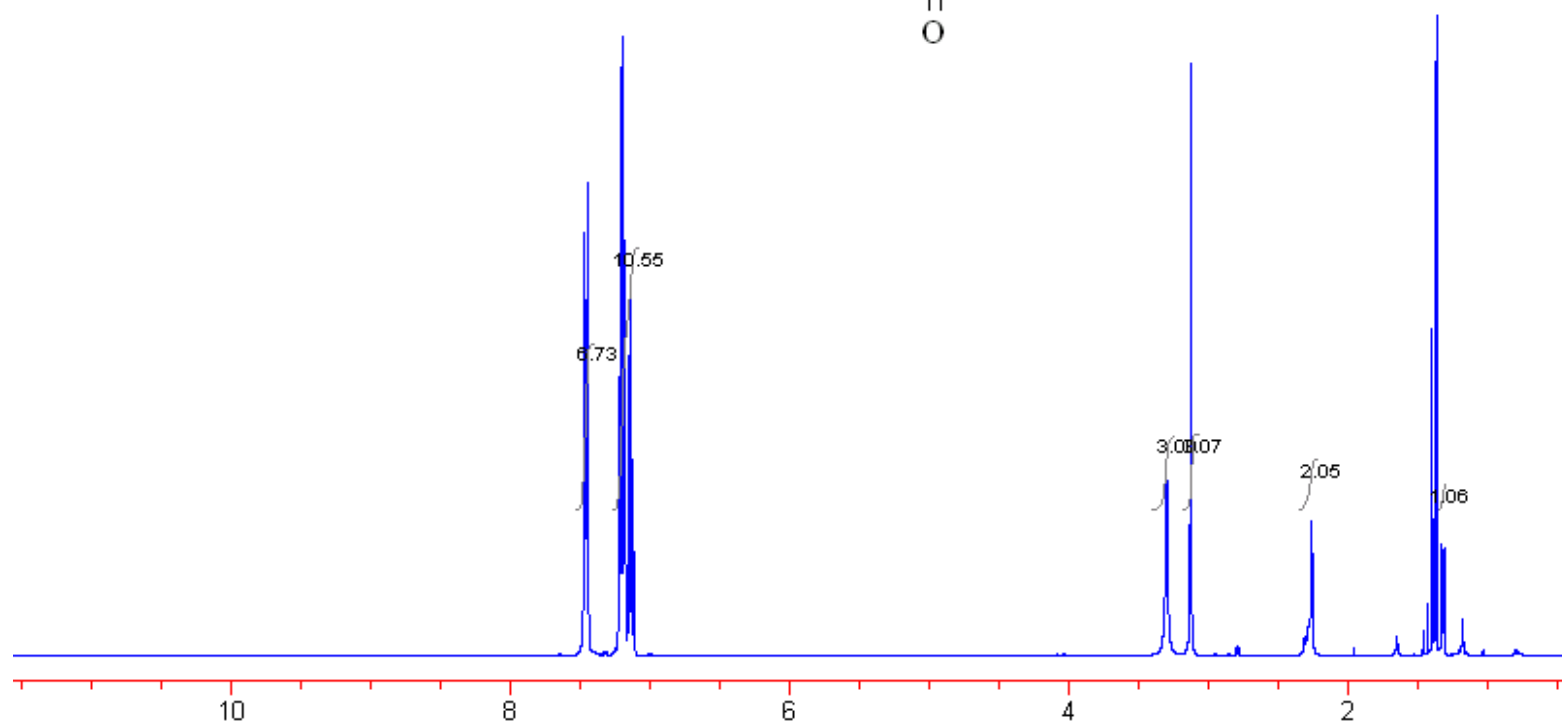

N-Methoxy-N-methyl-1-tritylaziridine-2-carboxamide 3c

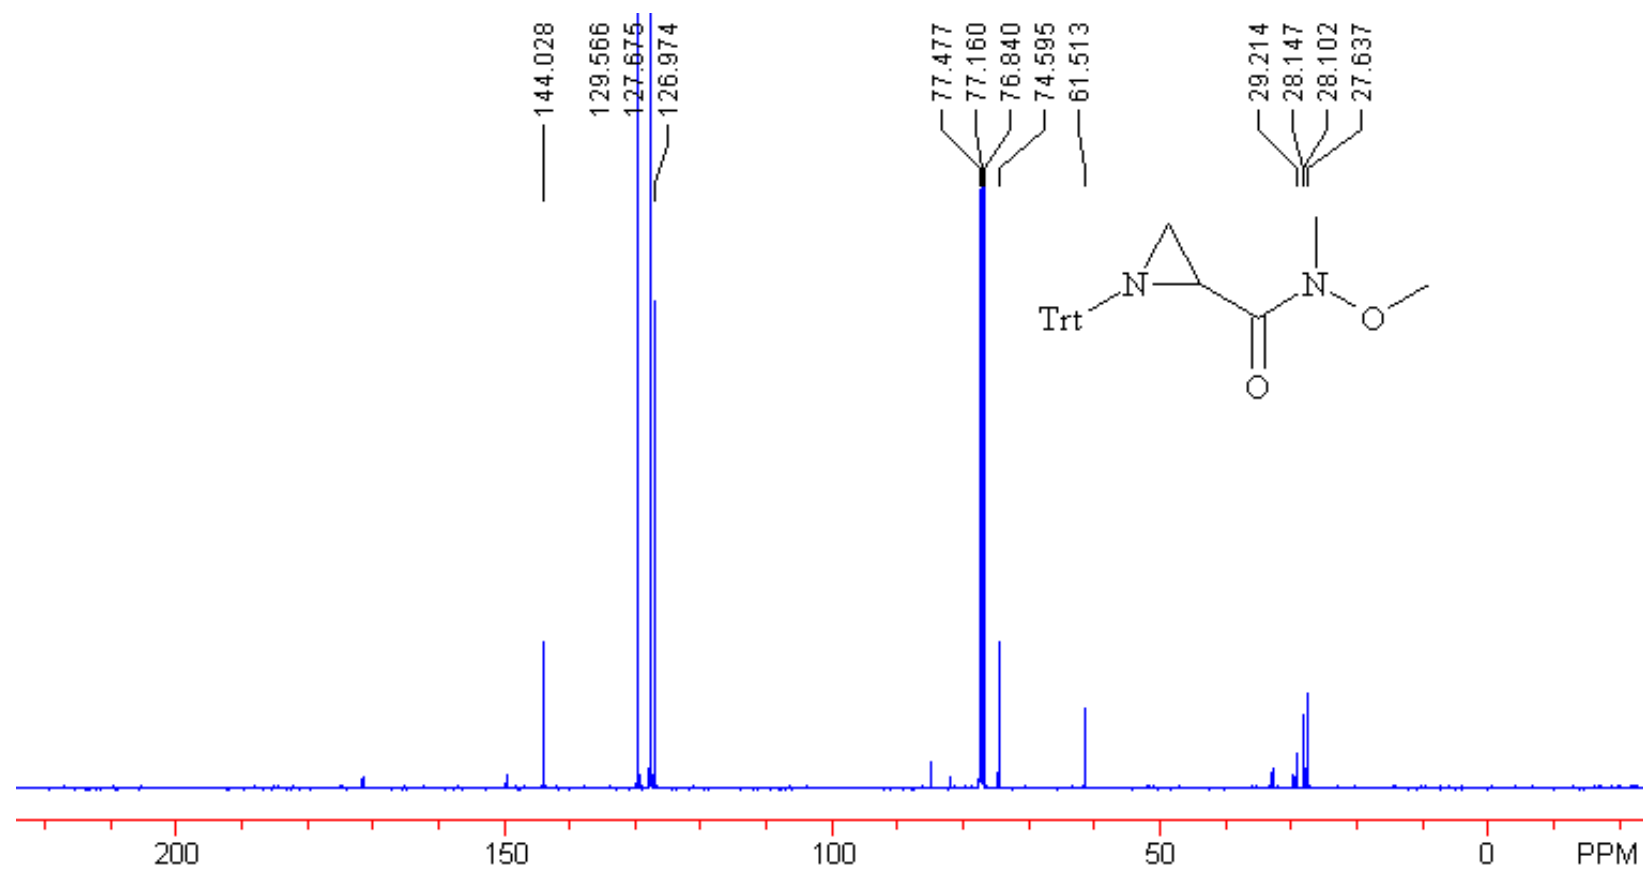

N-Methoxy-N-methyl-1-tritylaziridine-2-carboxamide 3c

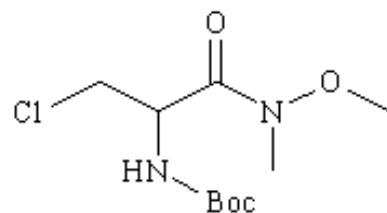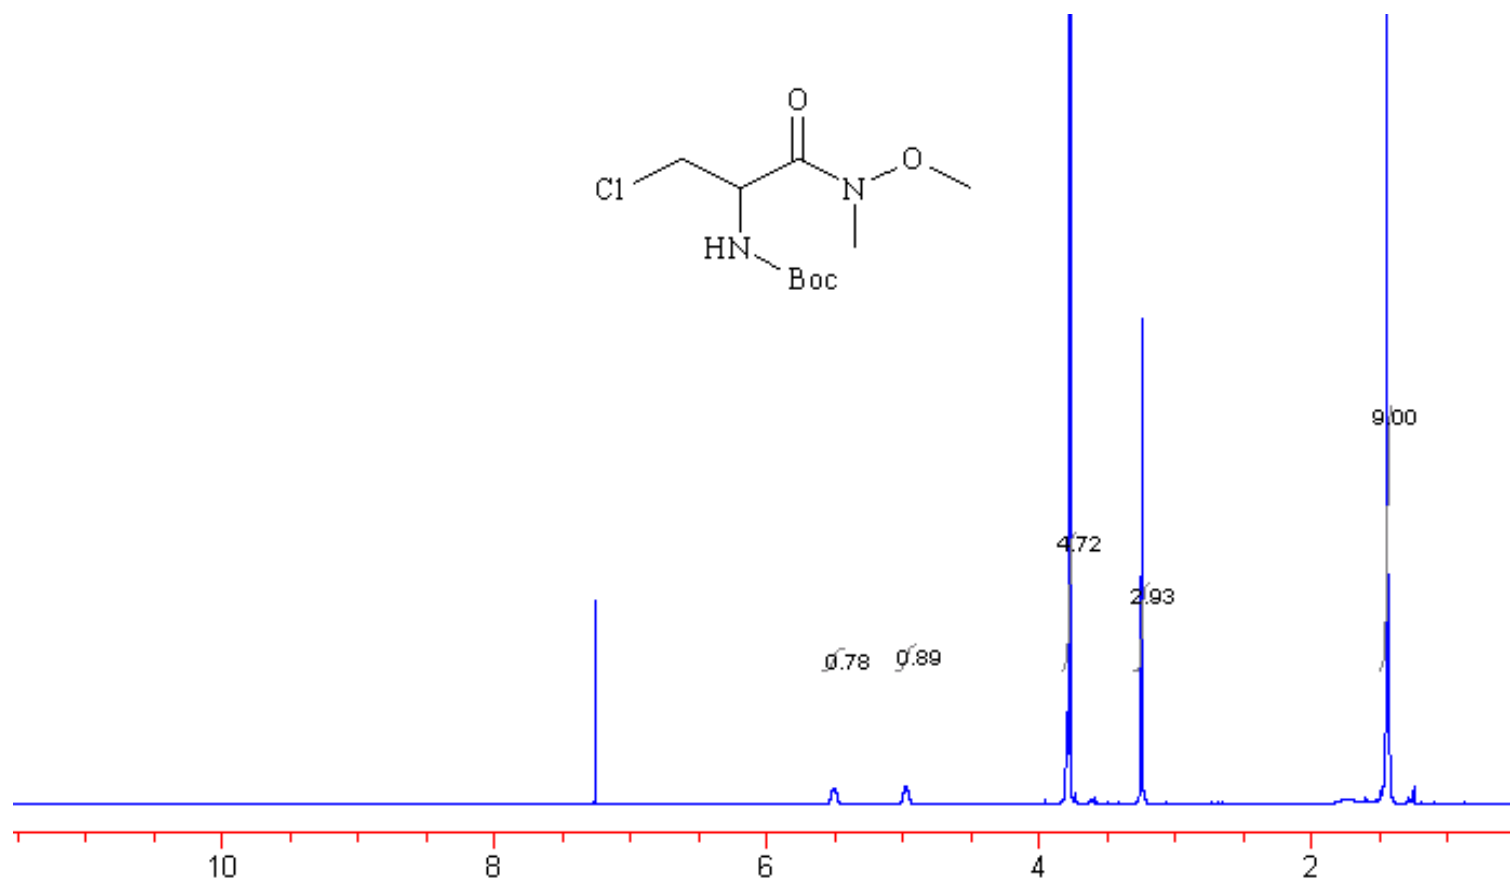

*tert*-Butyl (3-chloro-1-(methoxy(methyl)amino)-1-oxopropan-2-yl)carbamate 3d

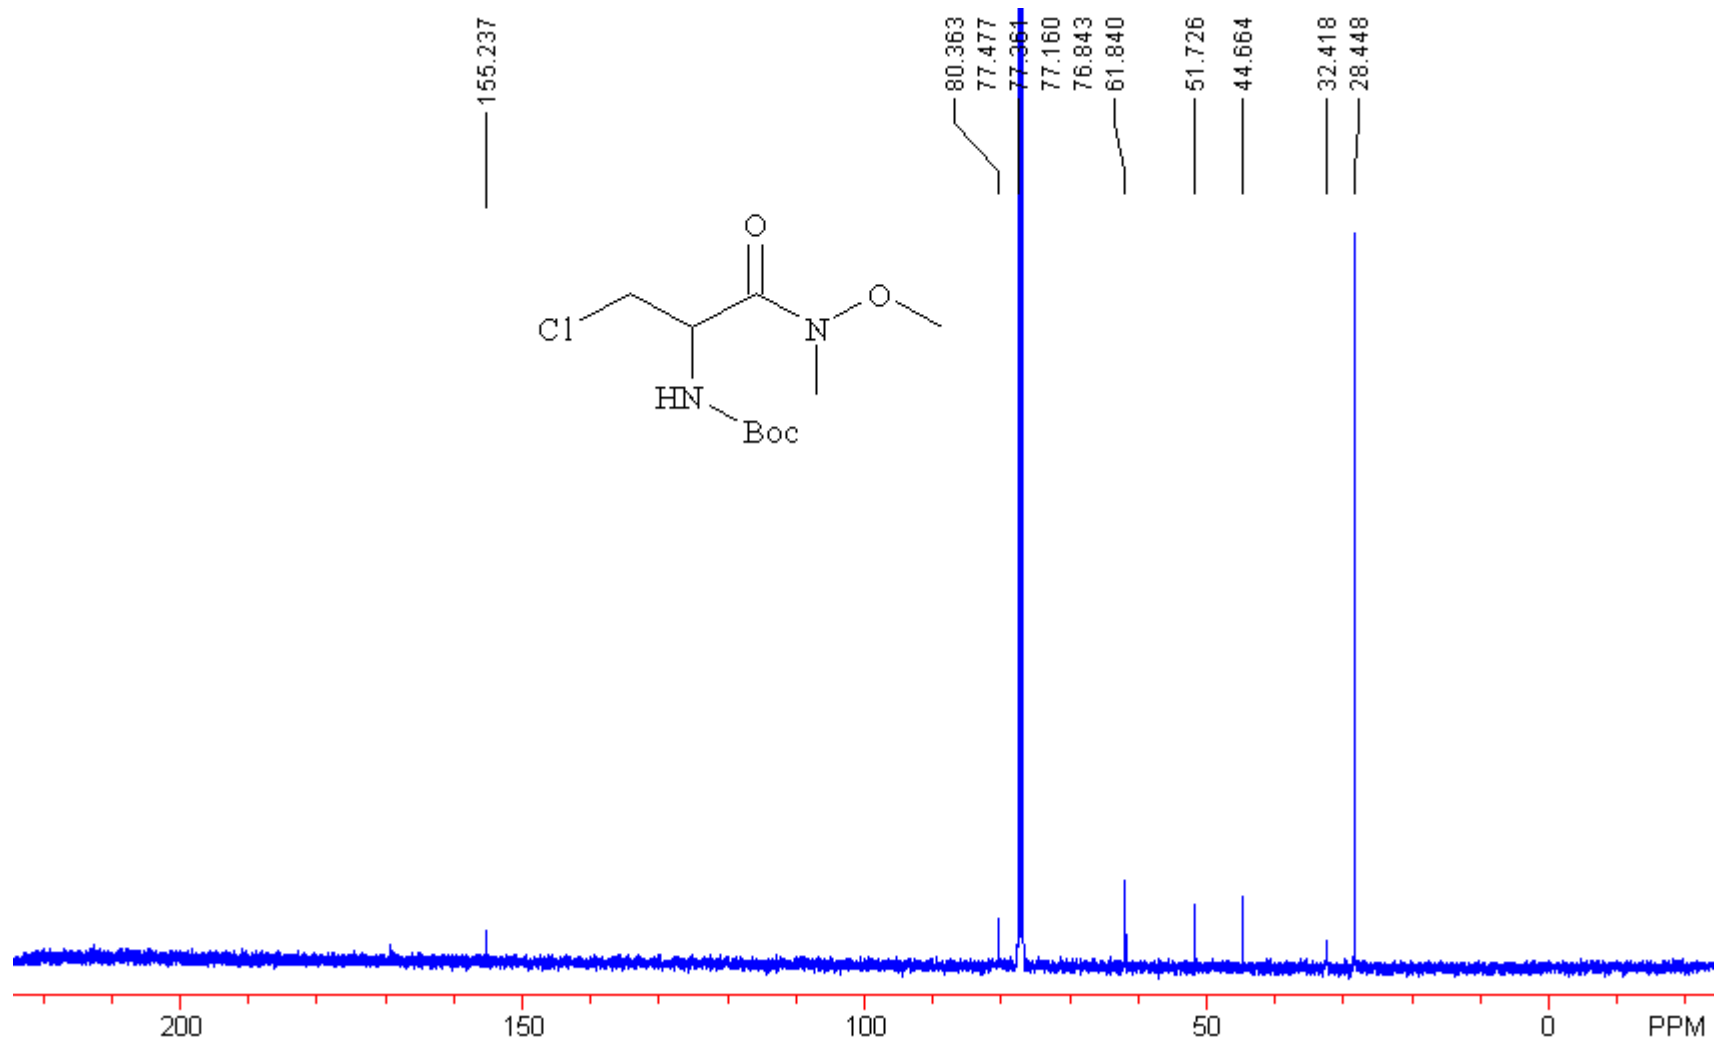

*tert*-Butyl (3-chloro-1-(methoxy(methyl)amino)-1-oxopropan-2-yl)carbamate 3d



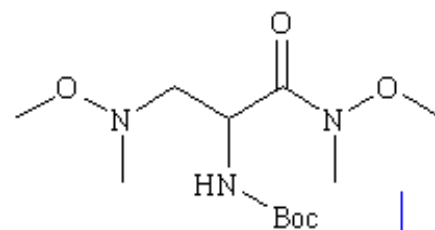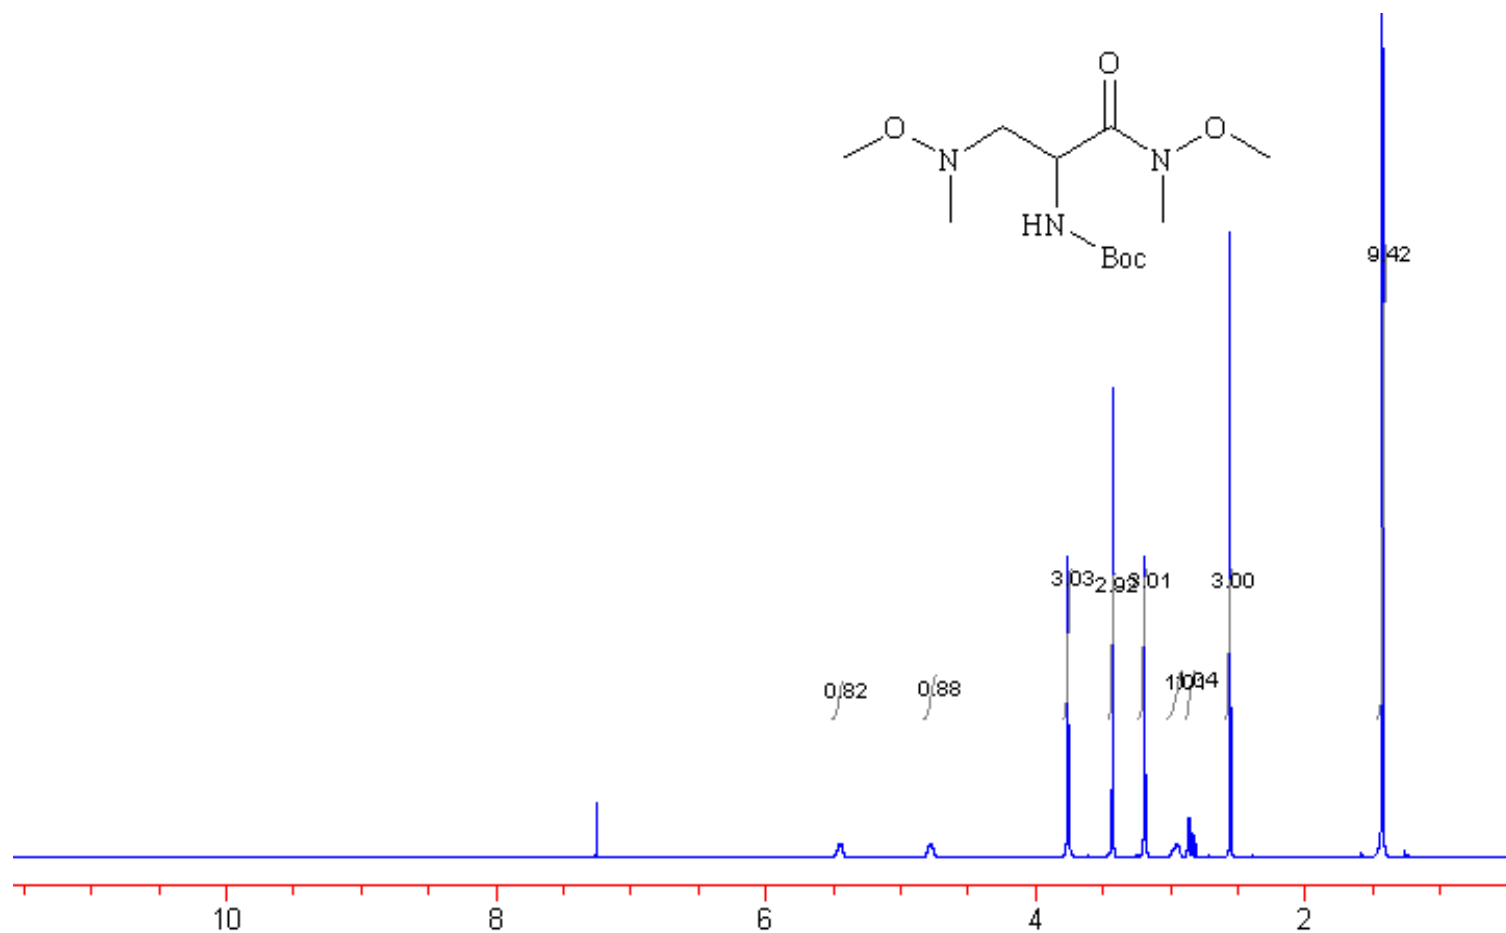

*tert*-Butyl (3,7-dimethyl-4-oxo-2,8-dioxa-3,7-diazanonan-5-yl)carbamate **3e**



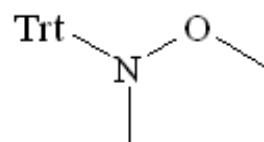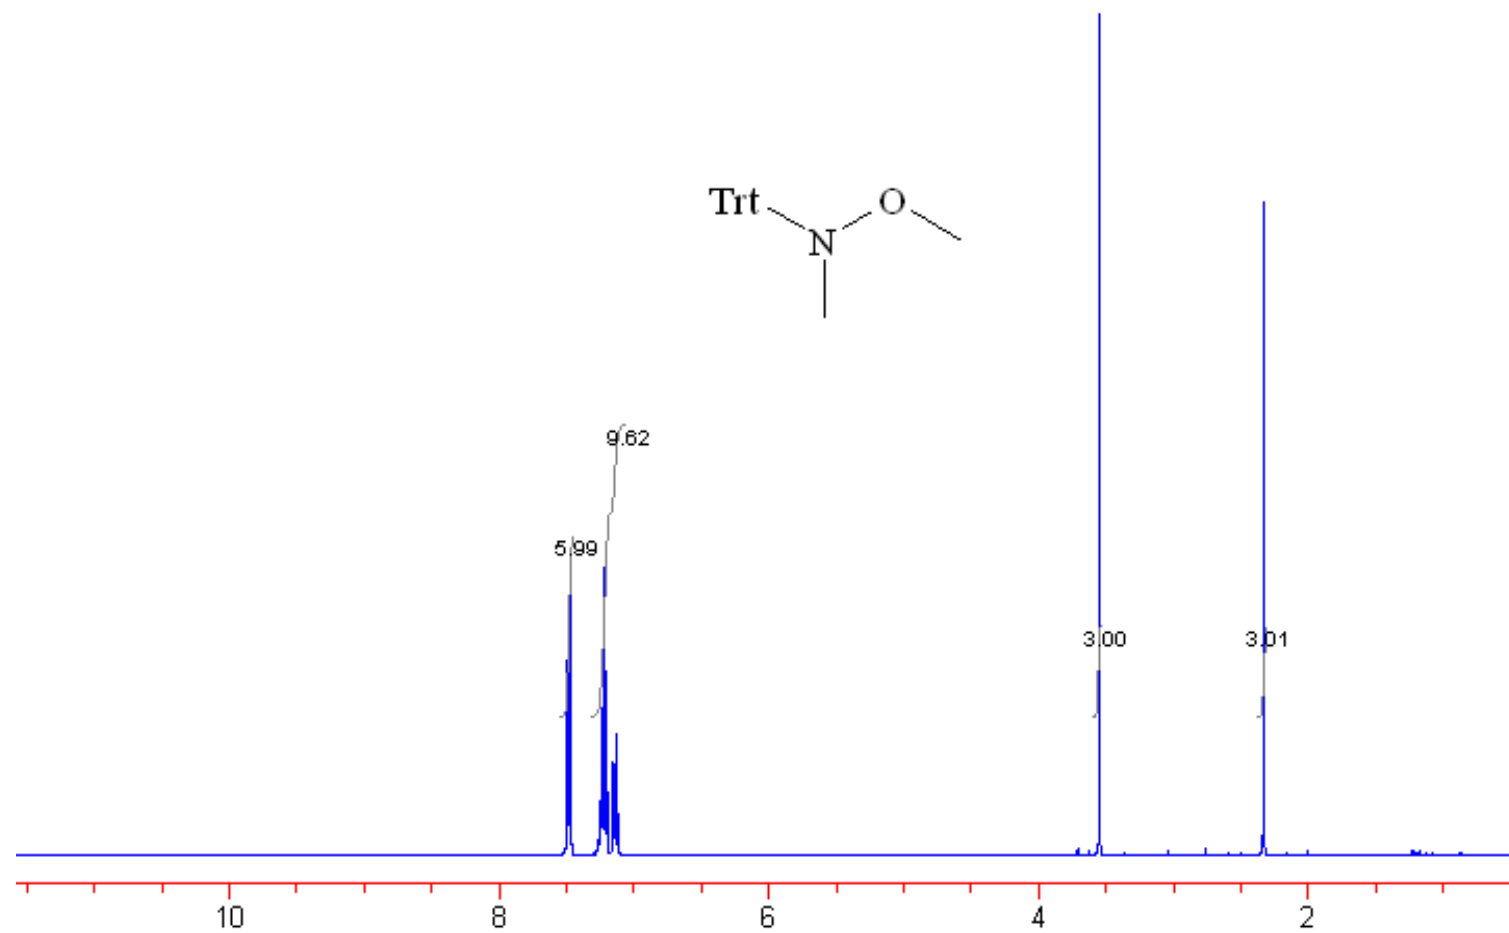

N,O-Dimethyl-N-tritylhydroxylamine 3f

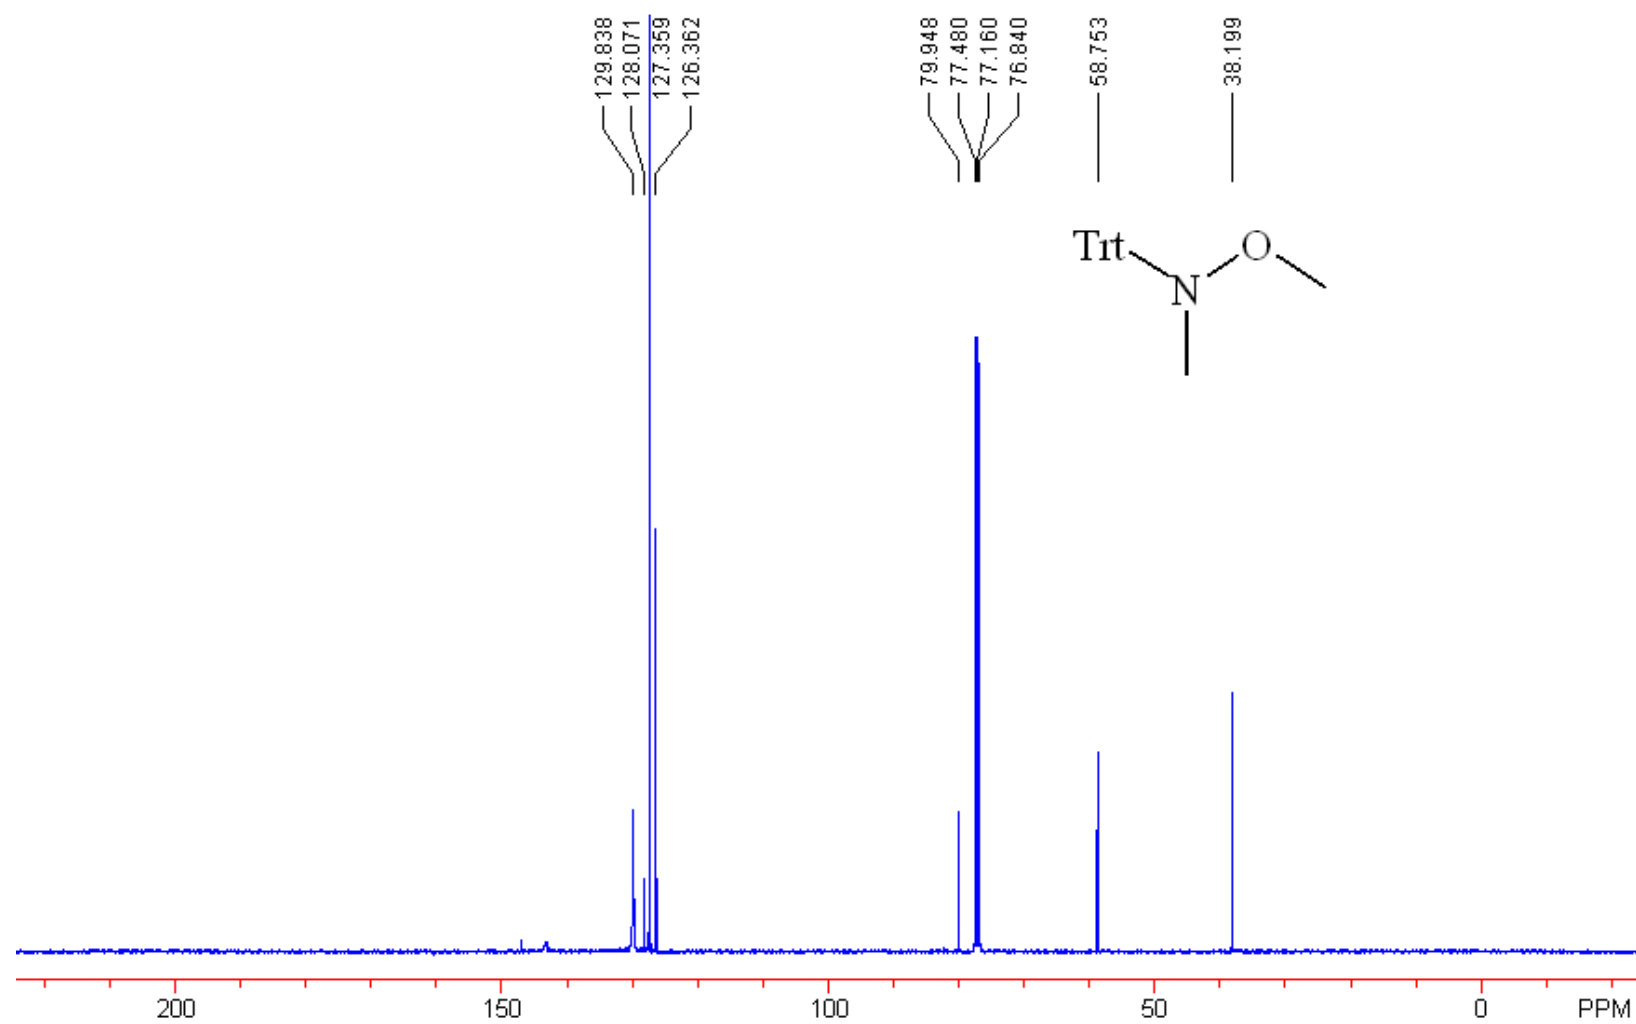

N,O-Dimethyl-N-tritylhydroxylamine 3f

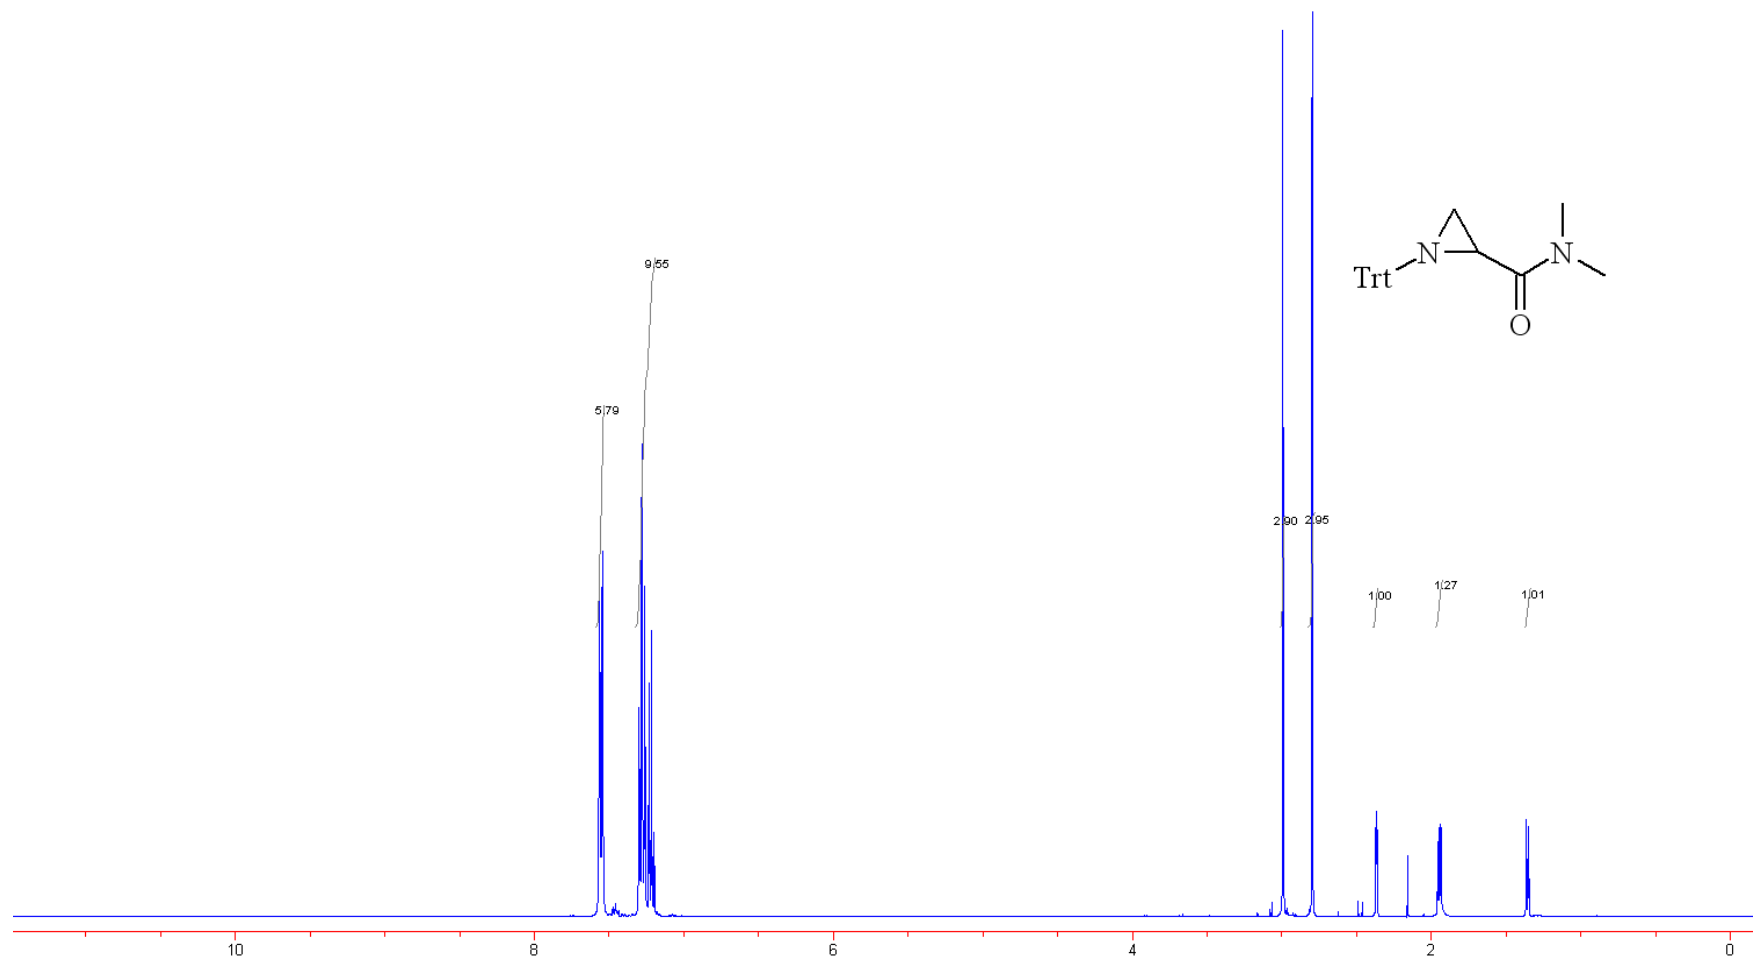

**1-Trityl-aziridine-2-carboxylic acid dimethylamide 4a**



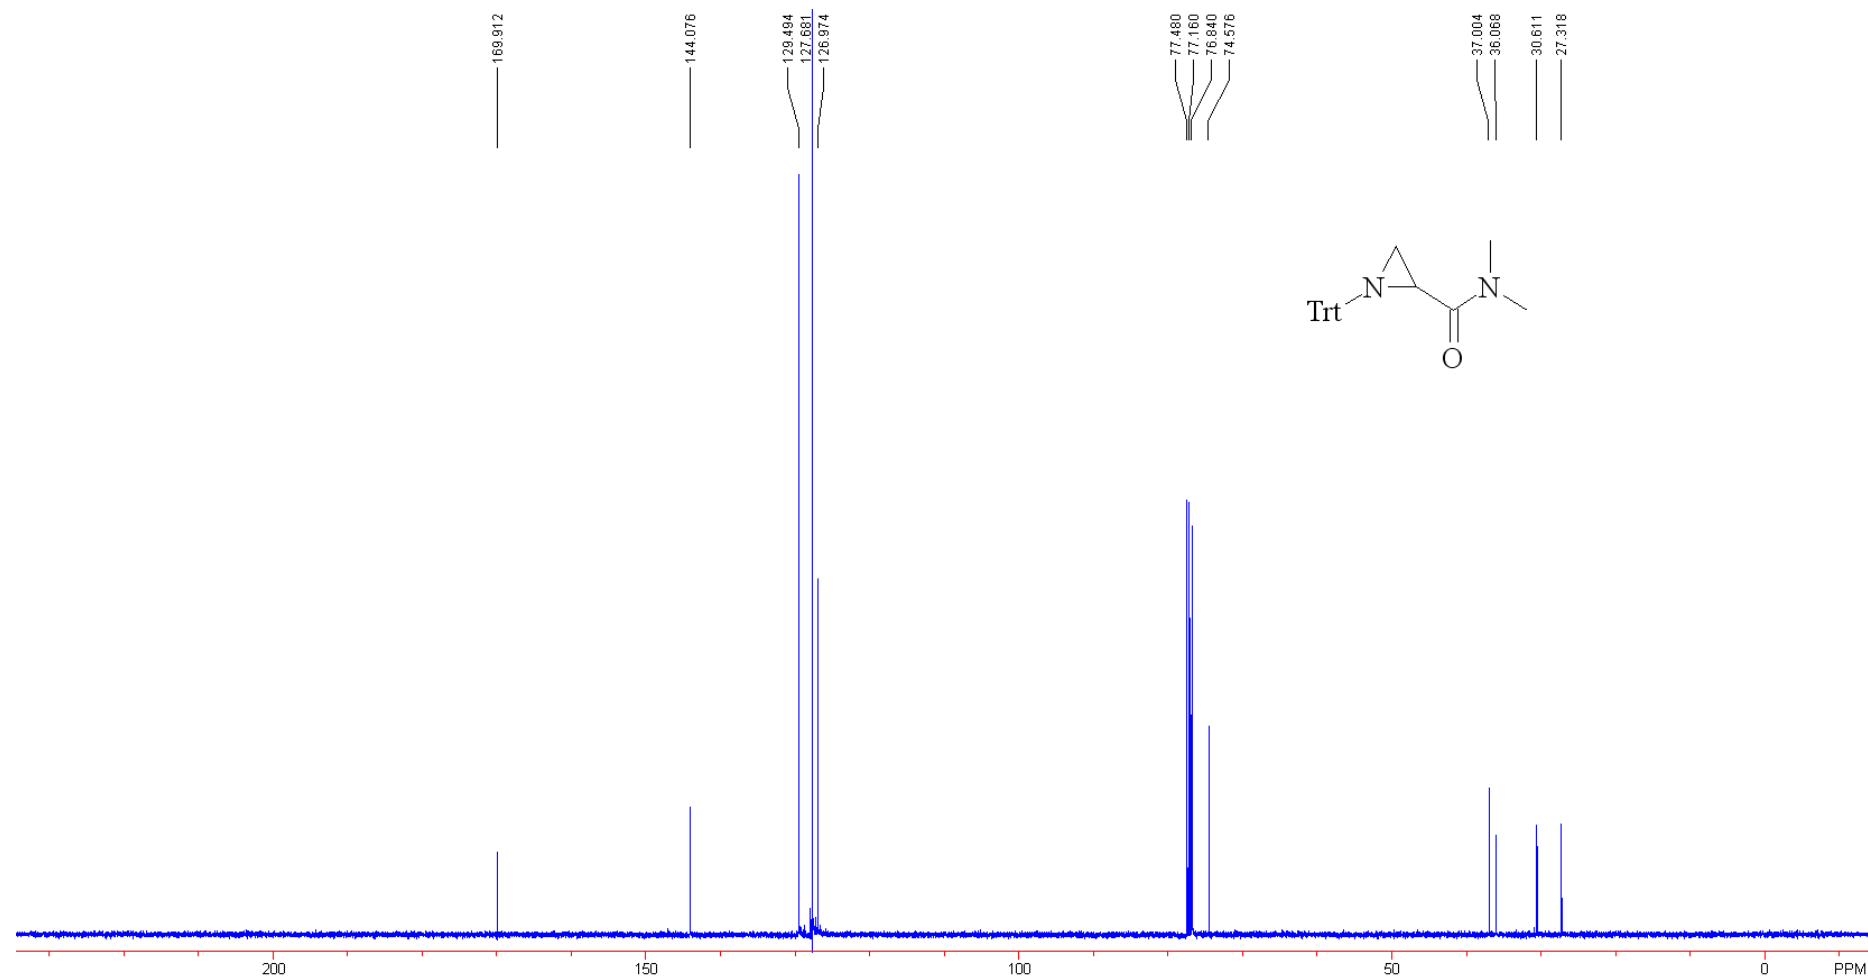

1-Trityl-aziridine-2-carboxylic acid dimethylamide 4a

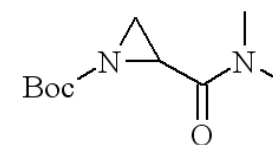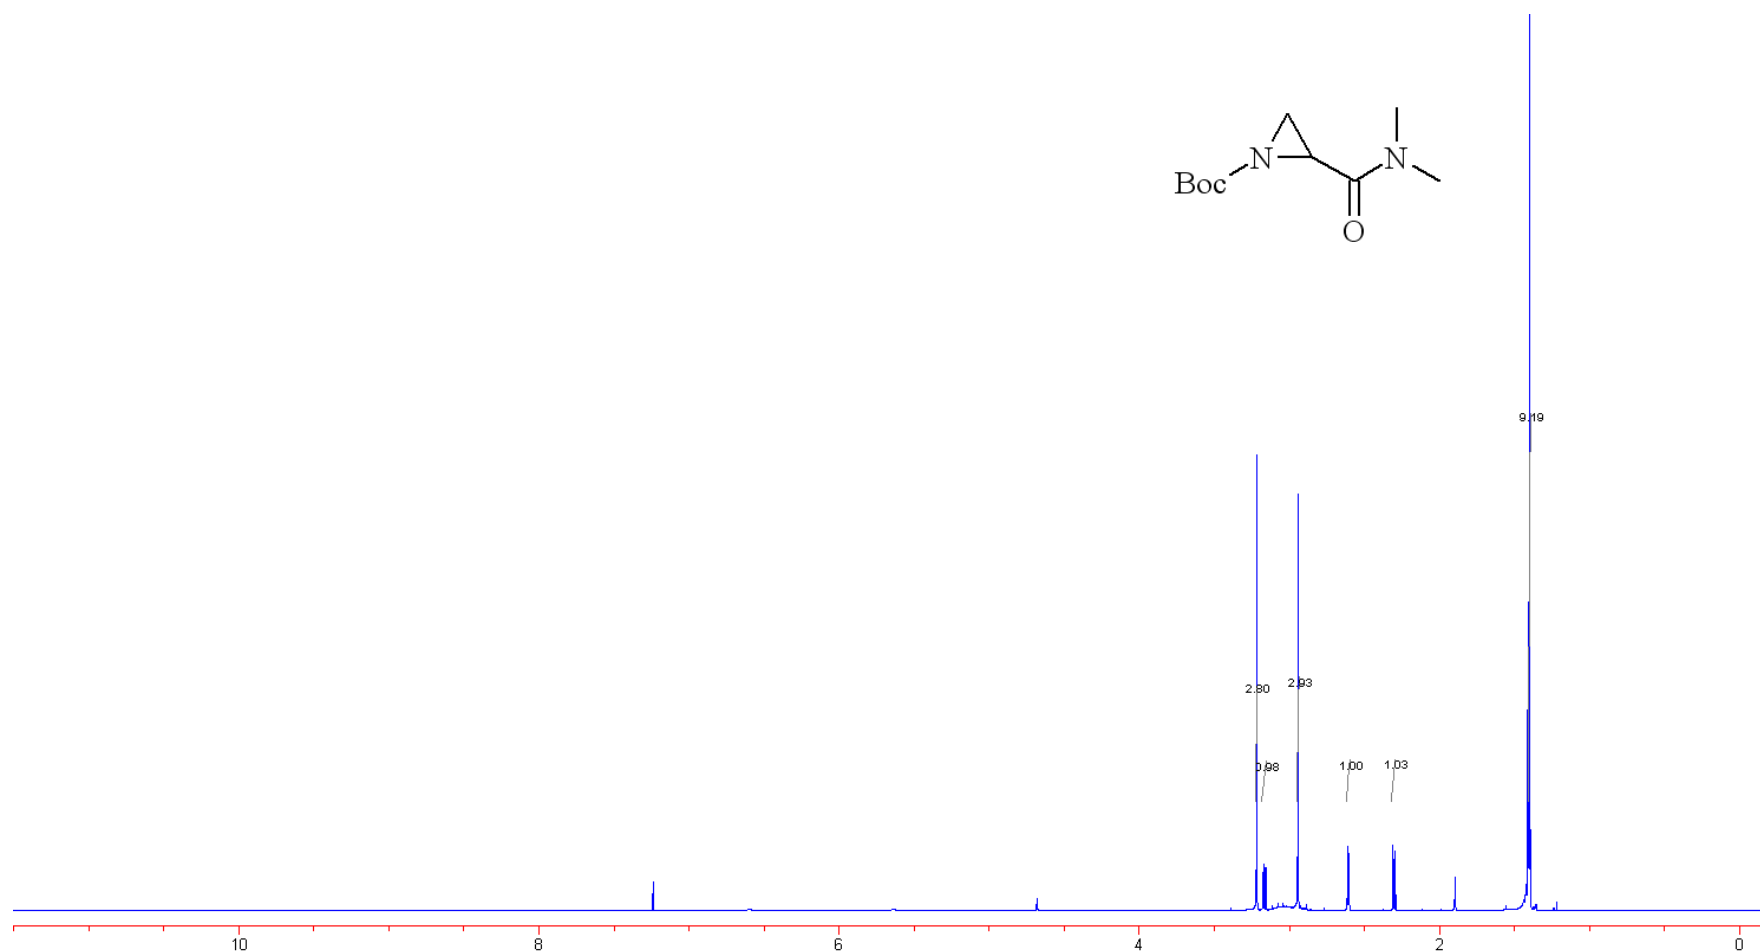

**2-Dimethylcarbamoyl-aziridine-1-carboxylic acid *tert*-butyl ester 4b**

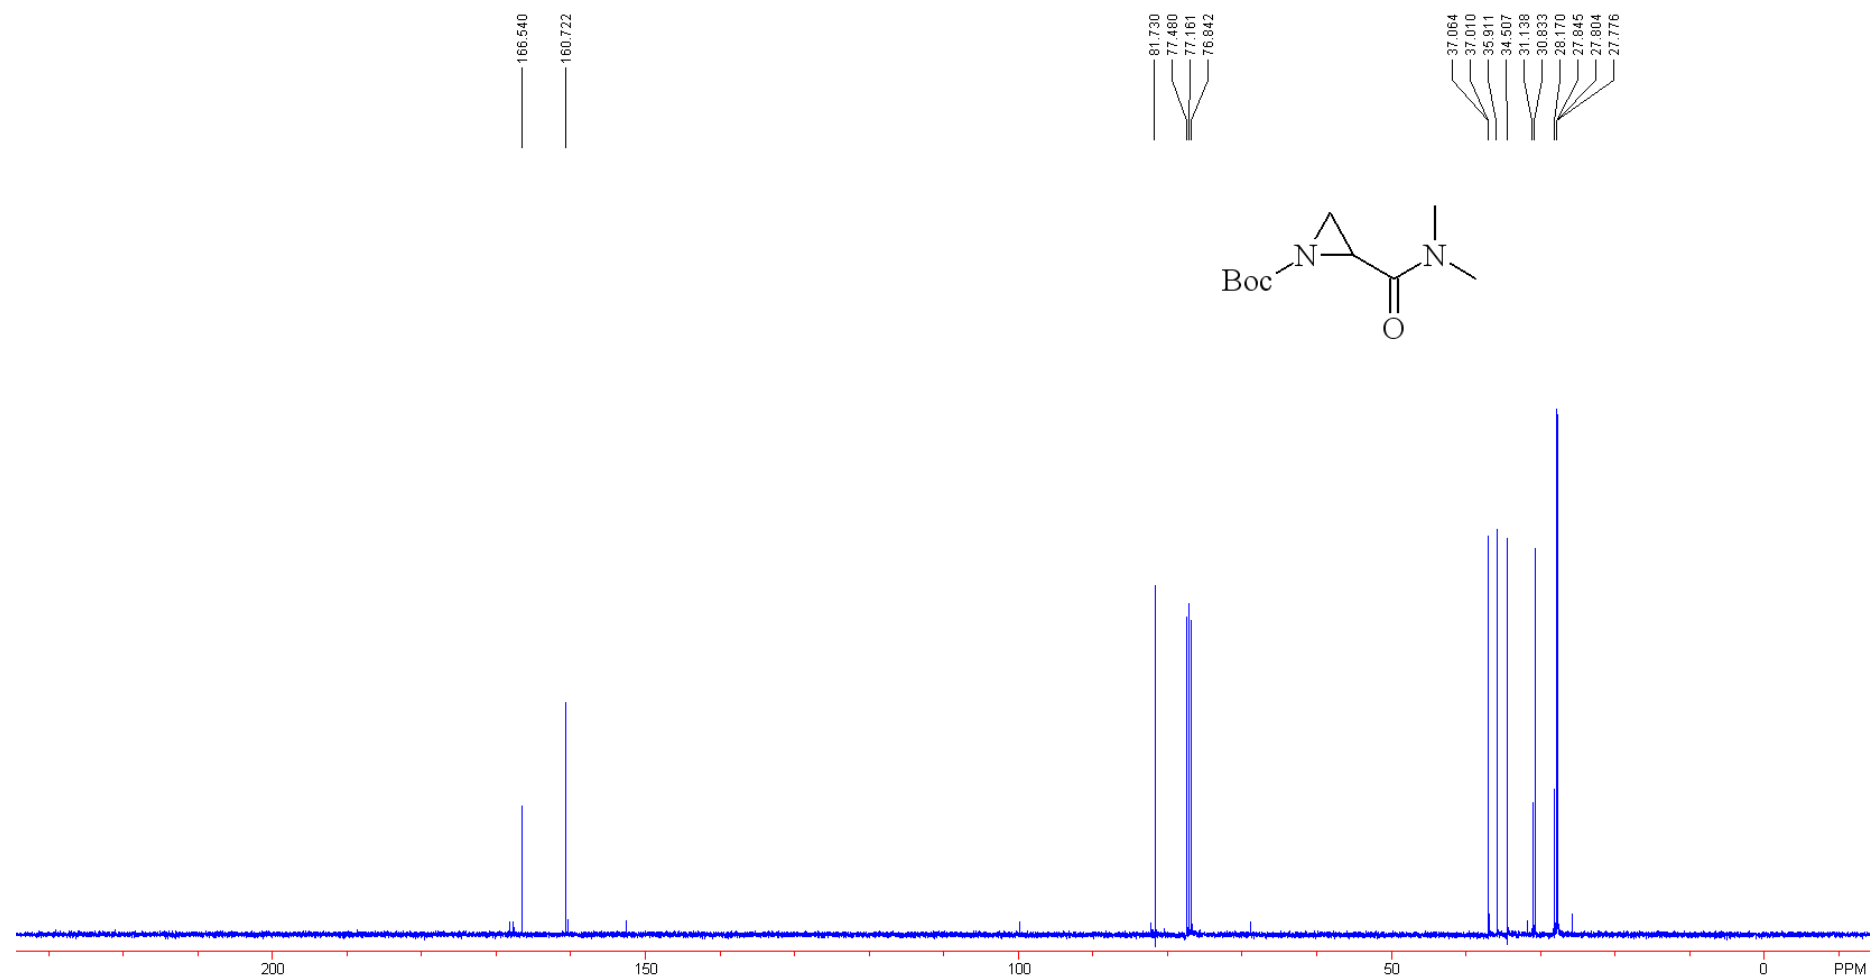

2-Dimethylcarbamoyl-aziridine-1-carboxylic acid *tert*-butyl ester 4b

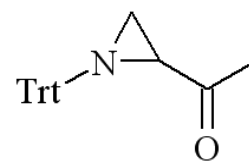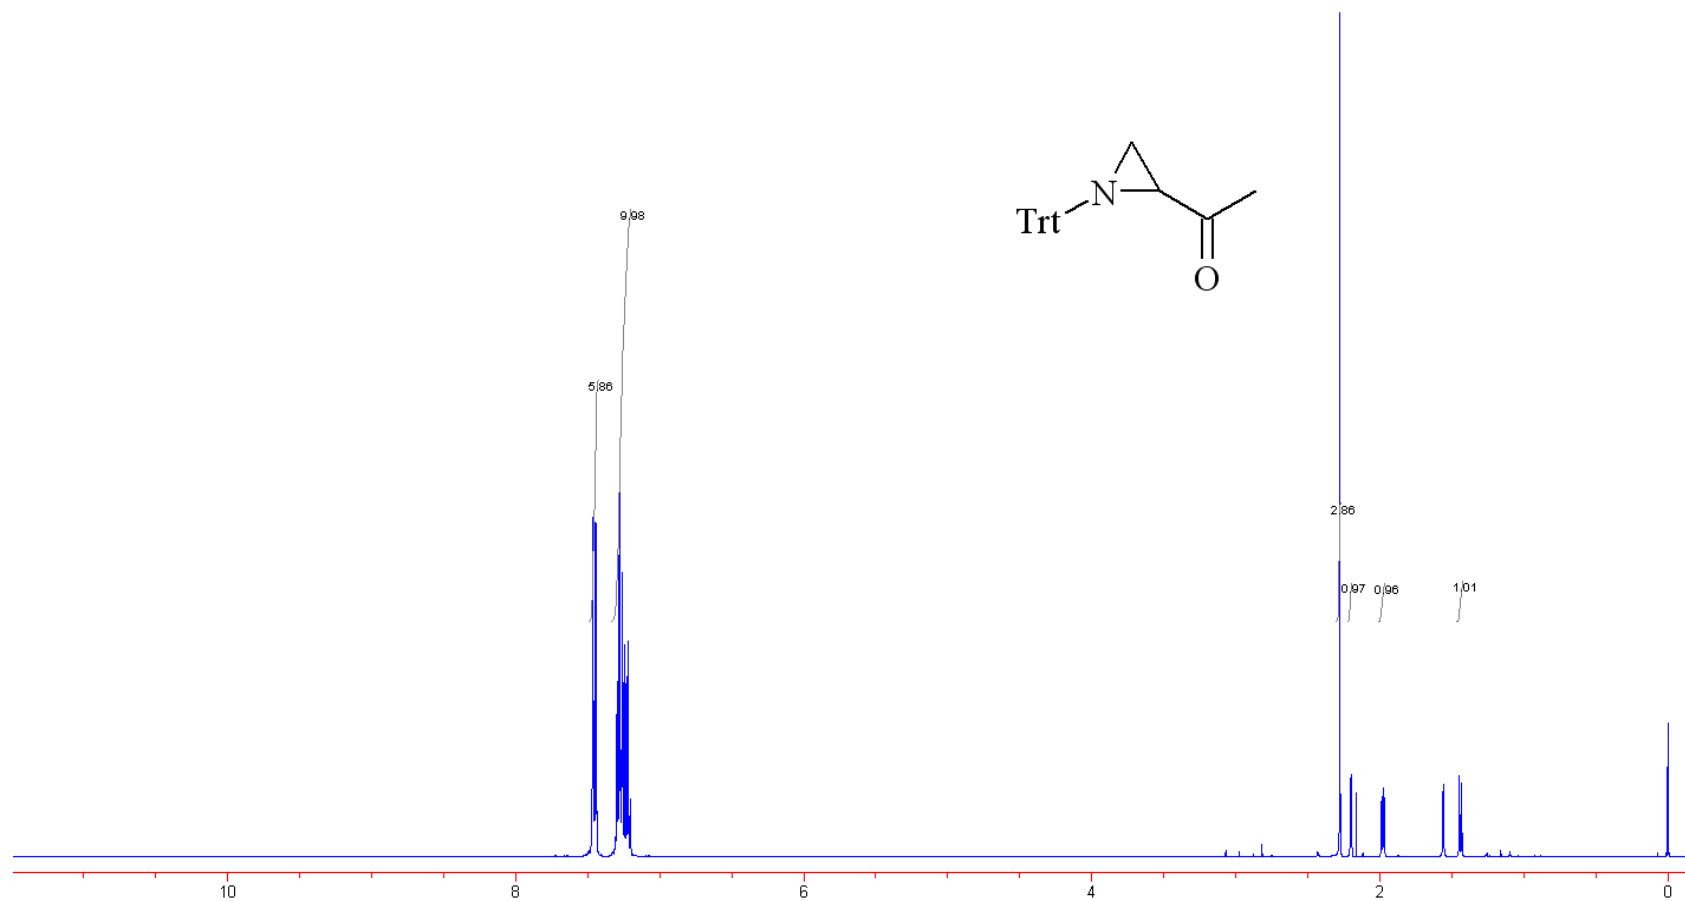

**1-(1-Triphenylmethylaziridine-2-yl) ethanone 5a**

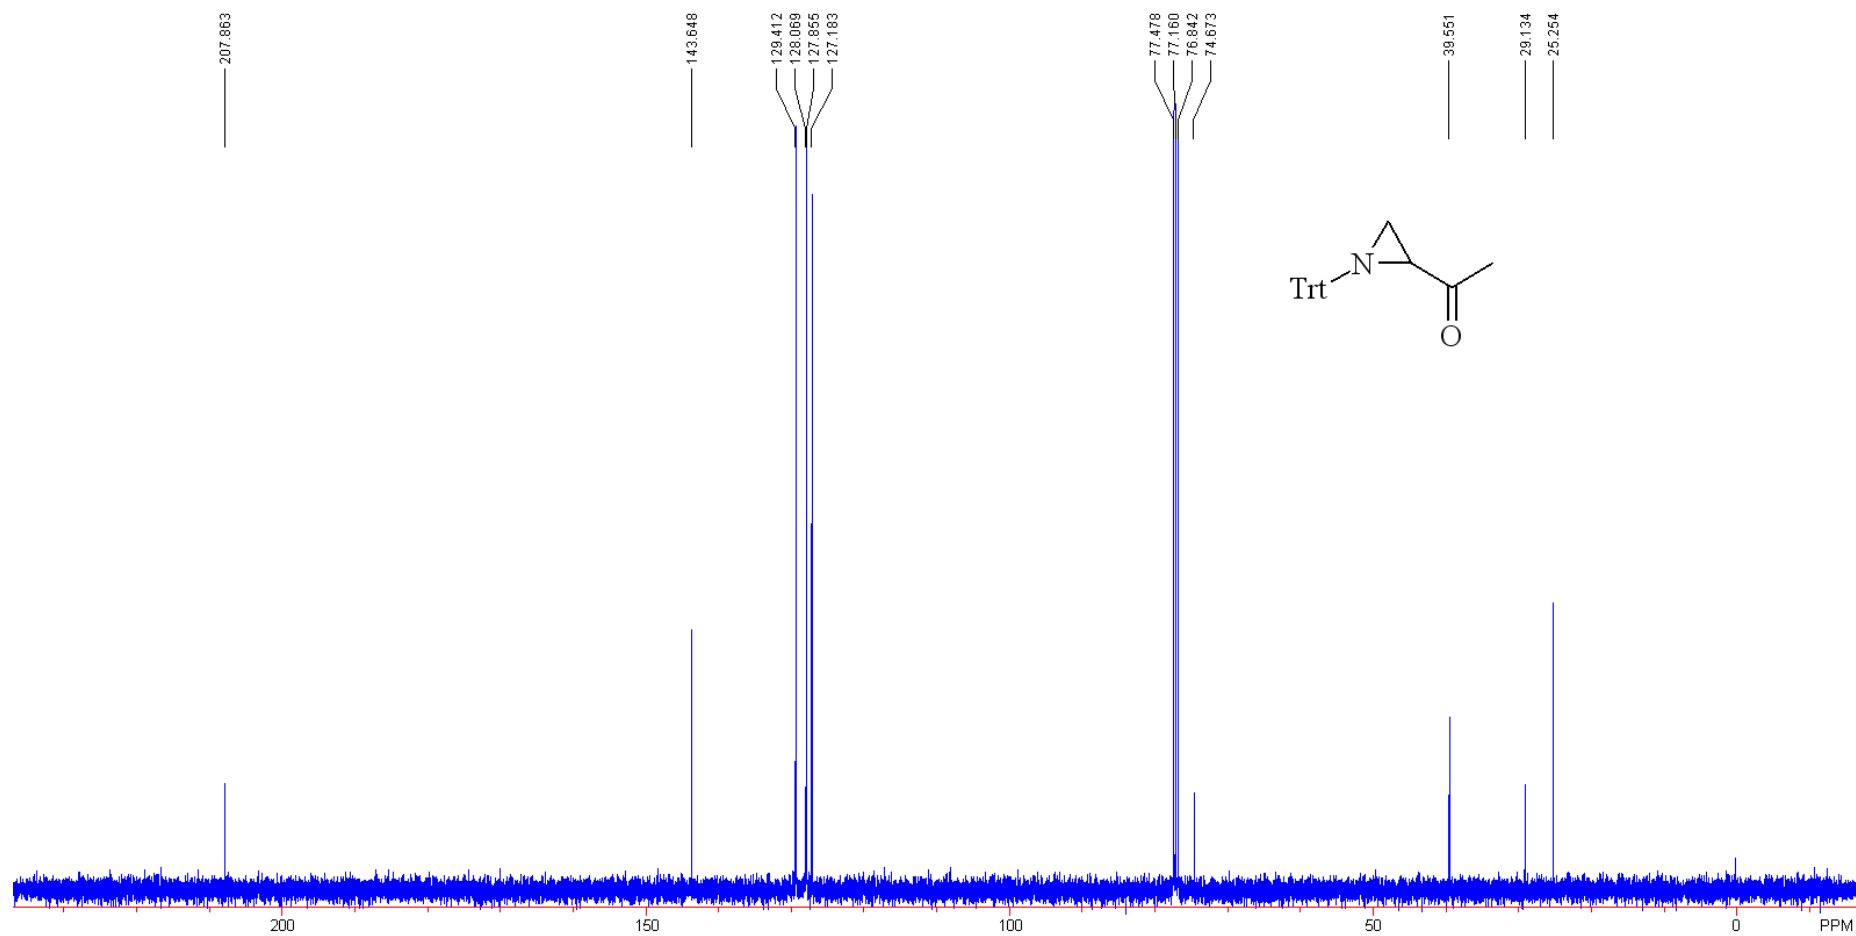

**1-(1-Triphenylmethylaziridine-2-yl) ethanone 5a**

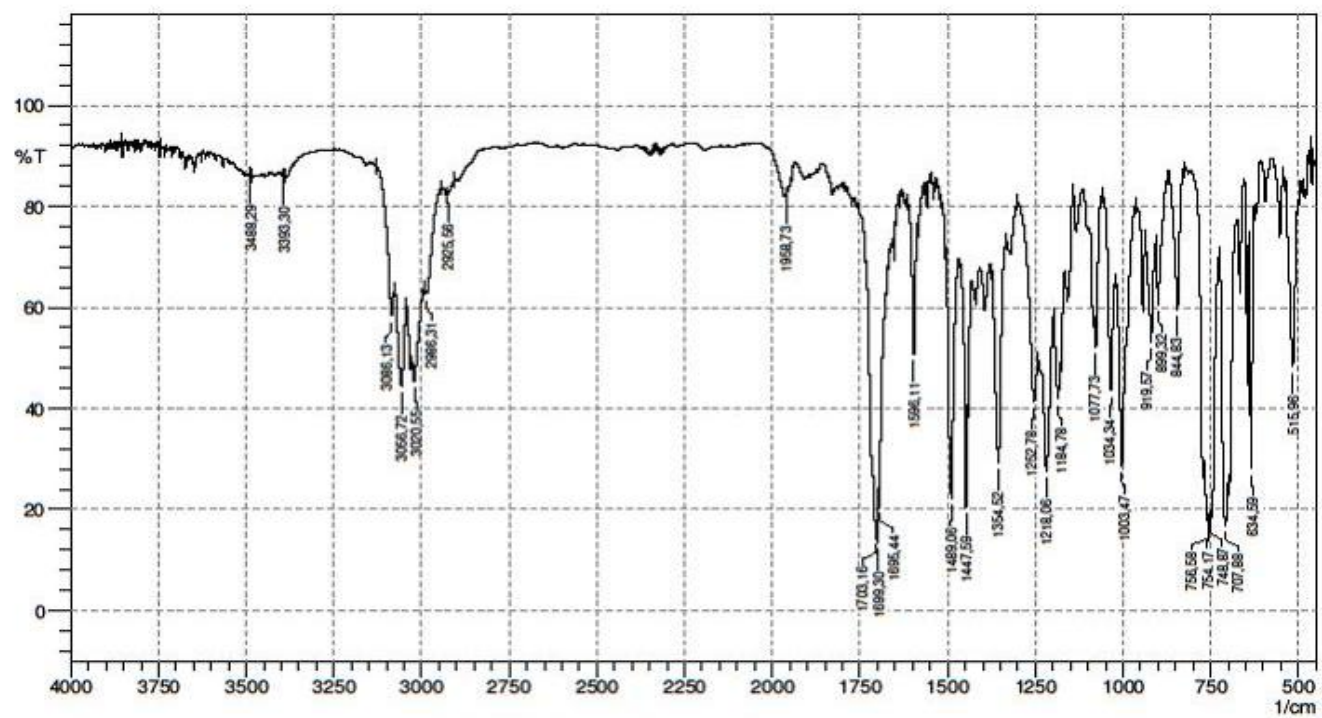

K30

1-(1-Triphenylmethylaziridine-2-yl) ethanone 5a

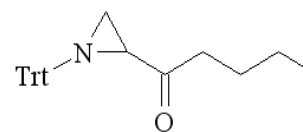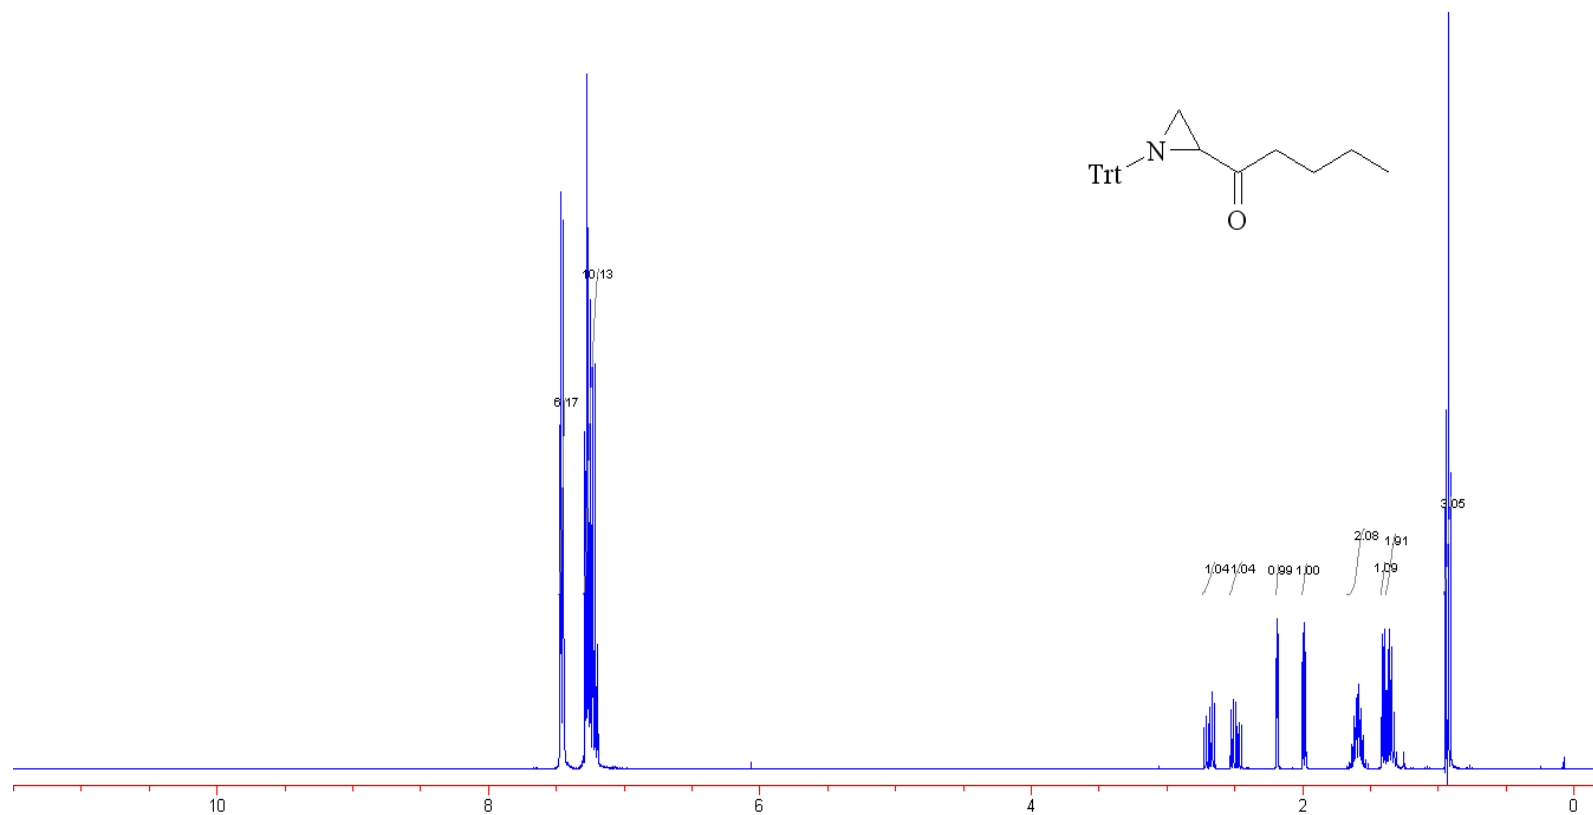

**1-(1-Triphenylmethylaziridine-2-yl) pentane-1-one 5b**

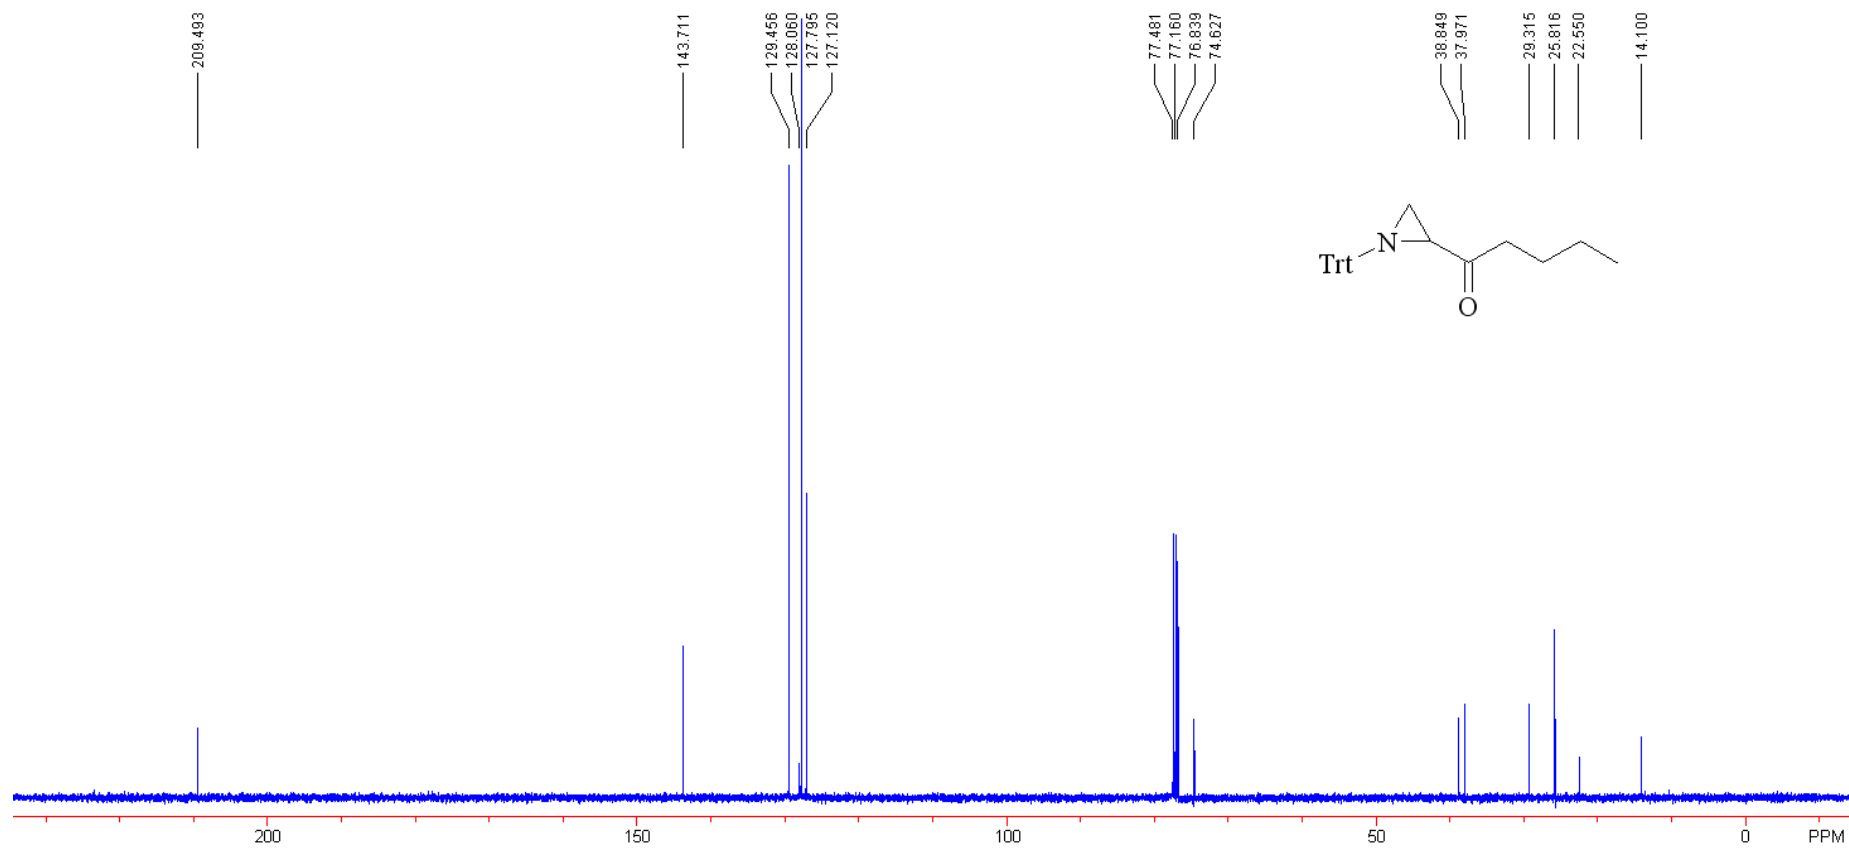



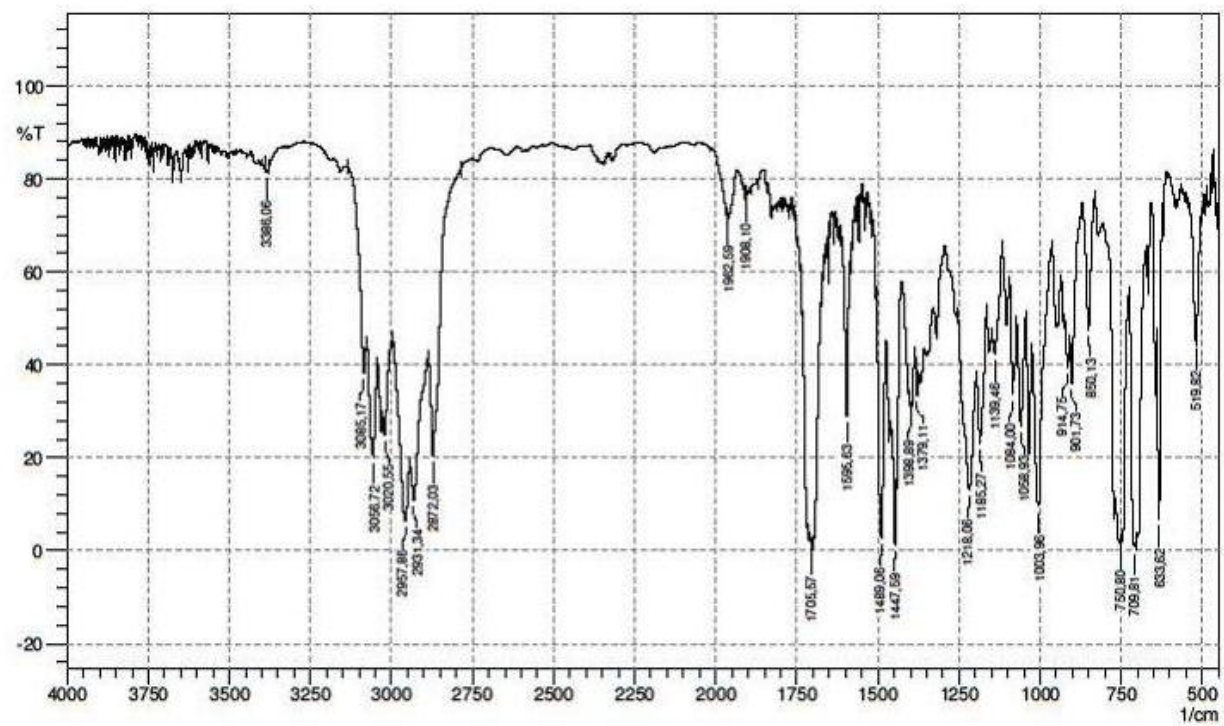

X447-2

1-(1-Triphenylmethylaziridine-2-yl) pentane-1-one 5b

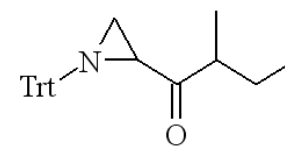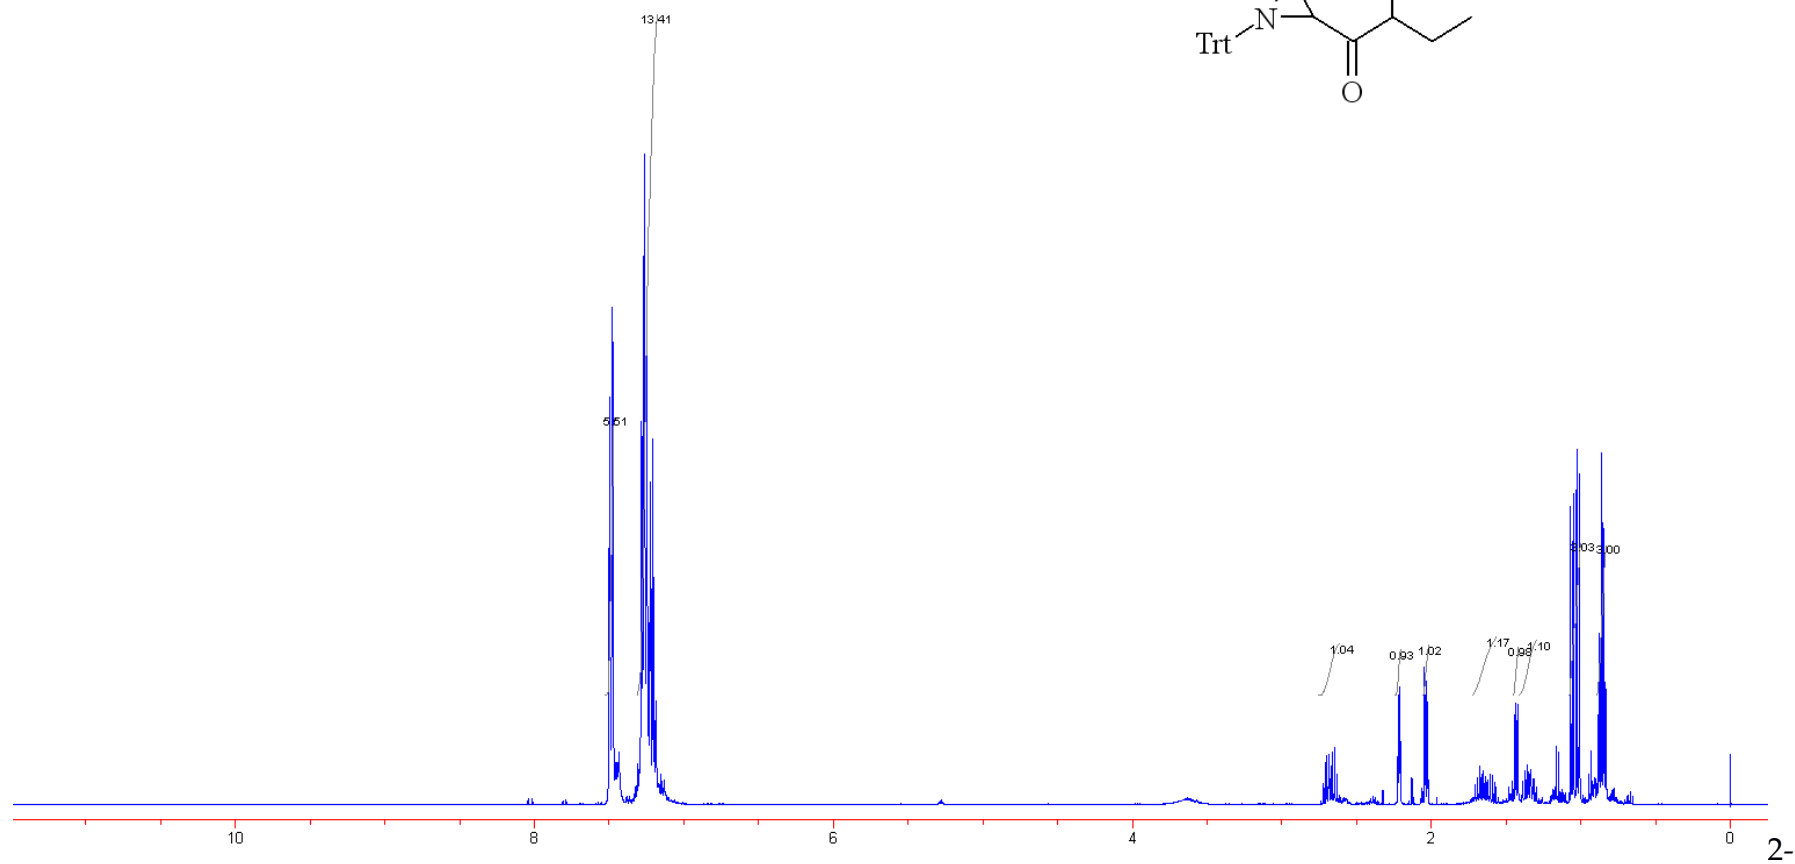

Methyl-1-(1-triphenylmethyllaziridine-2-yl)-butane-1-one (mixture of diastereomers) 5c

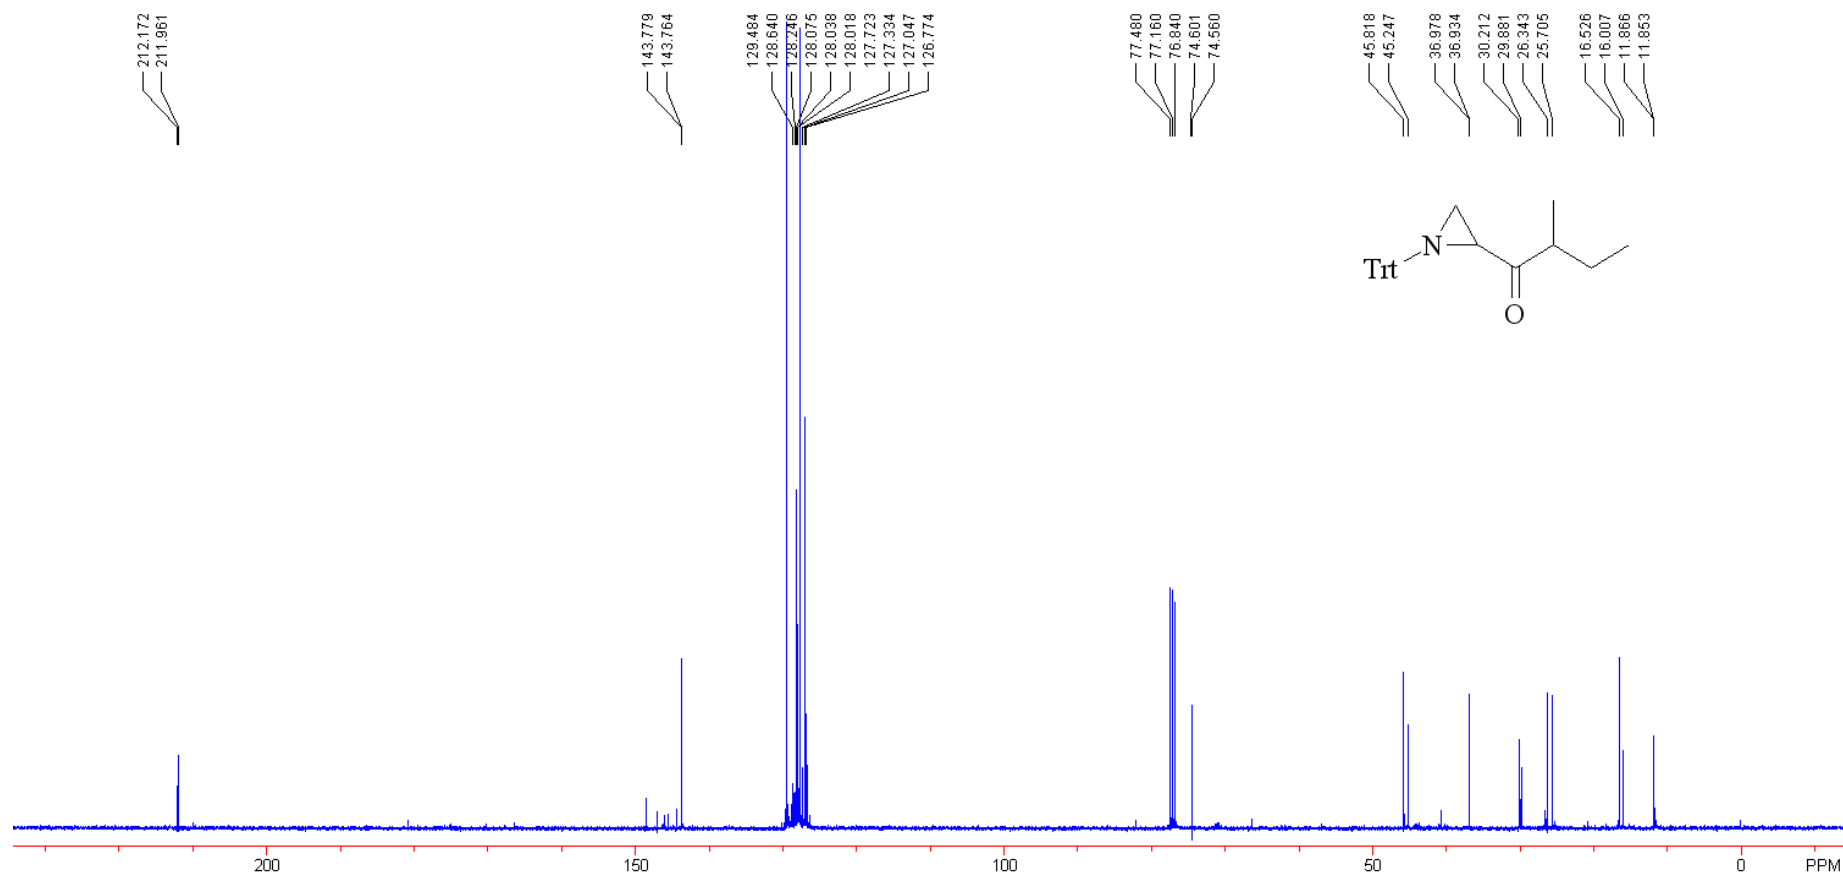

Methyl-1-(1-triphenylmethyllaziridine-2-yl)-butane-1-one (mixture of diastereomers) 5c

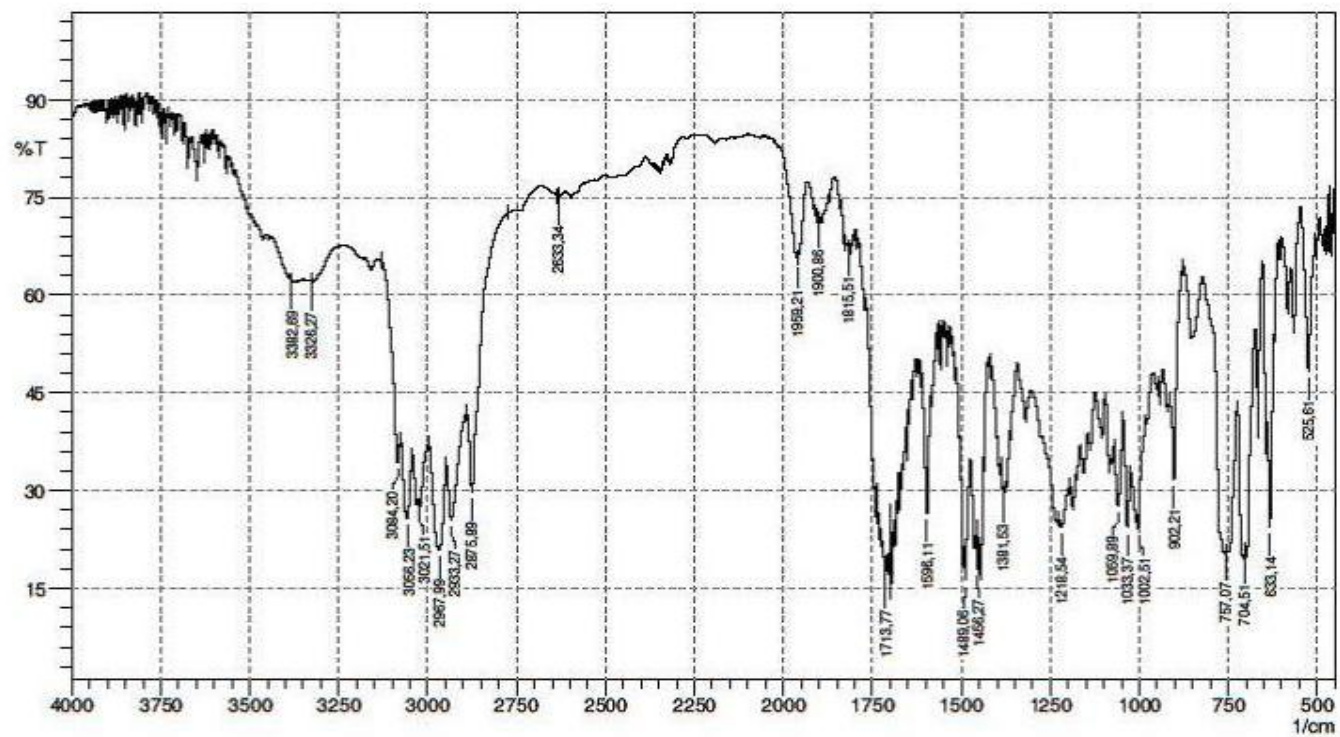

K28H2

Methyl-1-(1-triphenylmethyllaziridine-2-yl)-butane-1-one (mixture of diastereomers) 5c

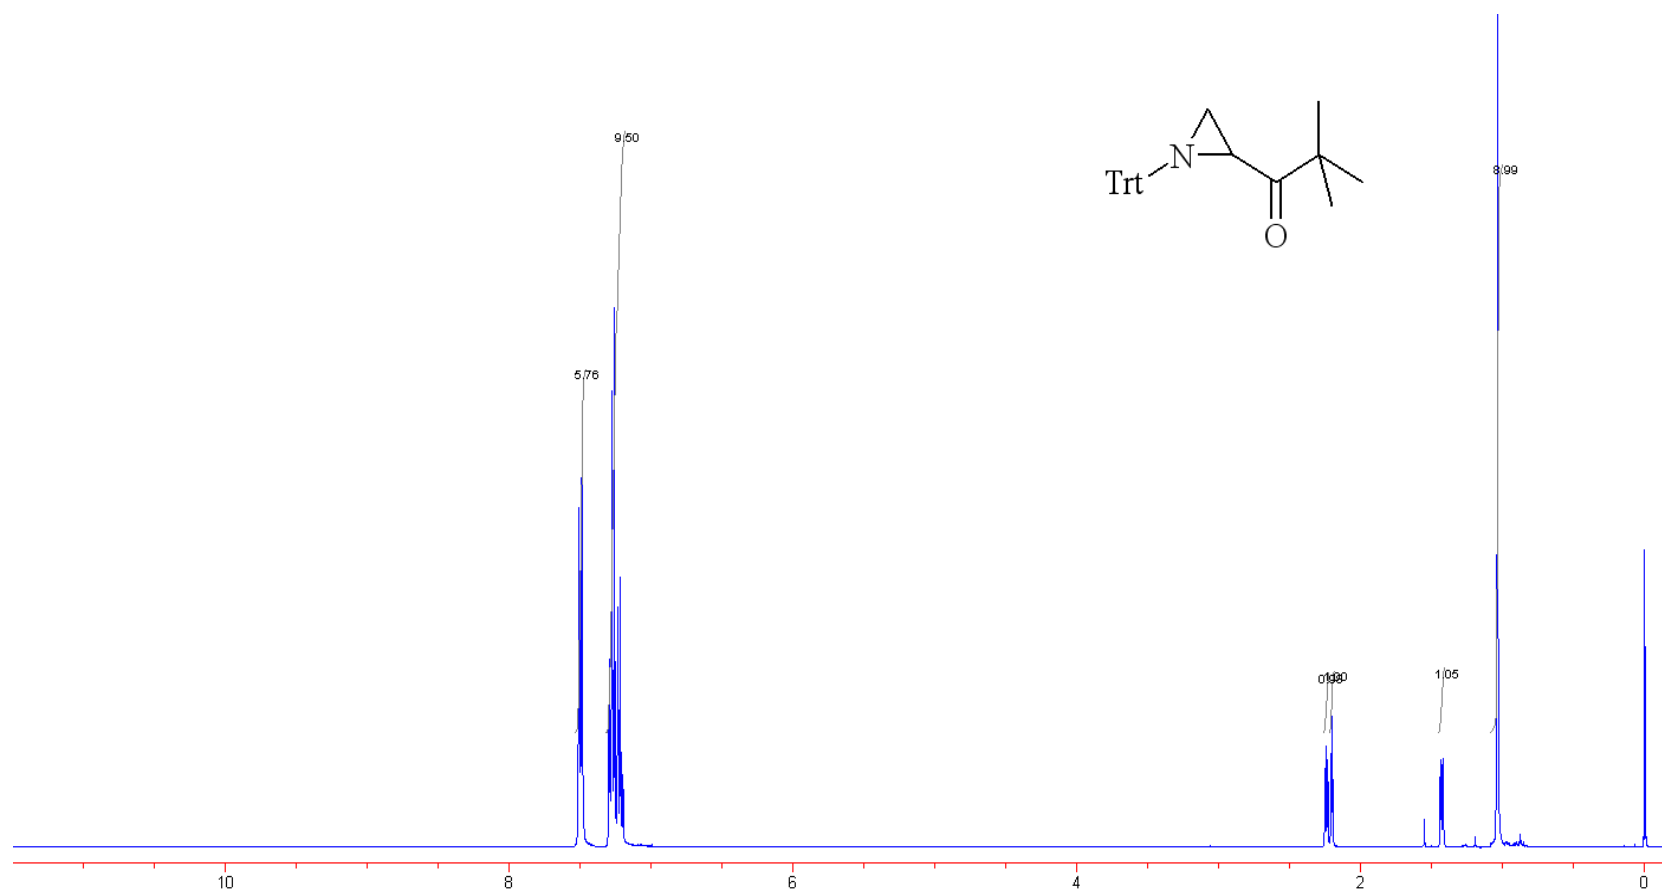

**2,2-Dimethyl-1-(1- triphenylmethylaziridine-2-yl)-propane-1-one 5d**

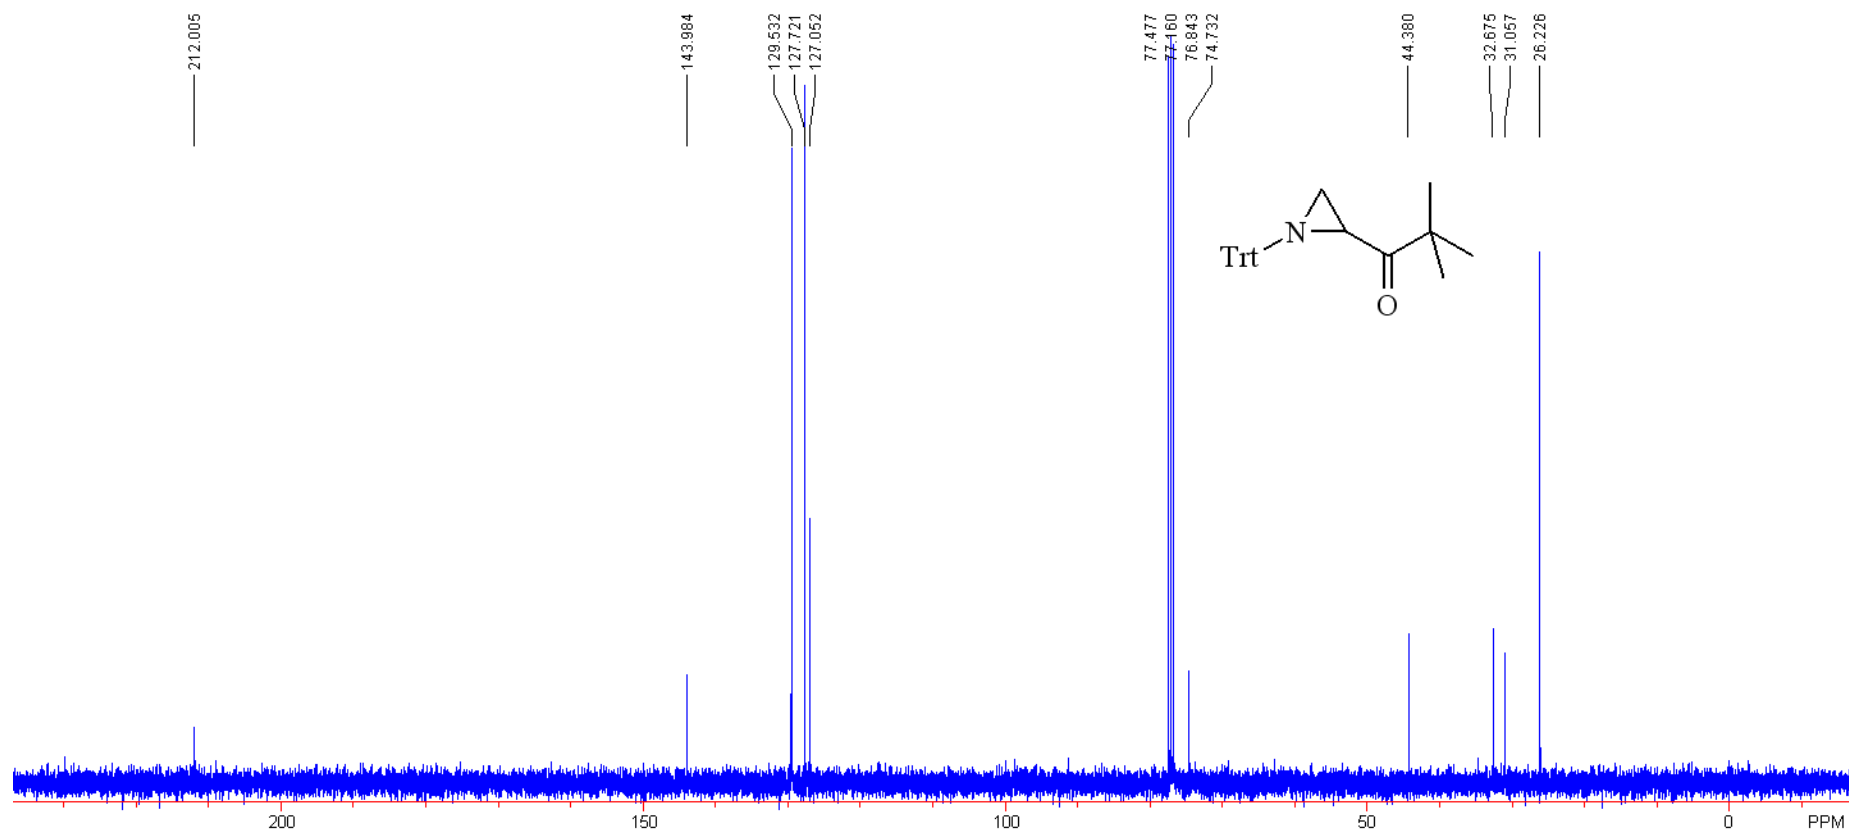

2,2-Dimethyl-1-(1- triphenylmethlaziridine-2-yl)-propane-1-one 5d

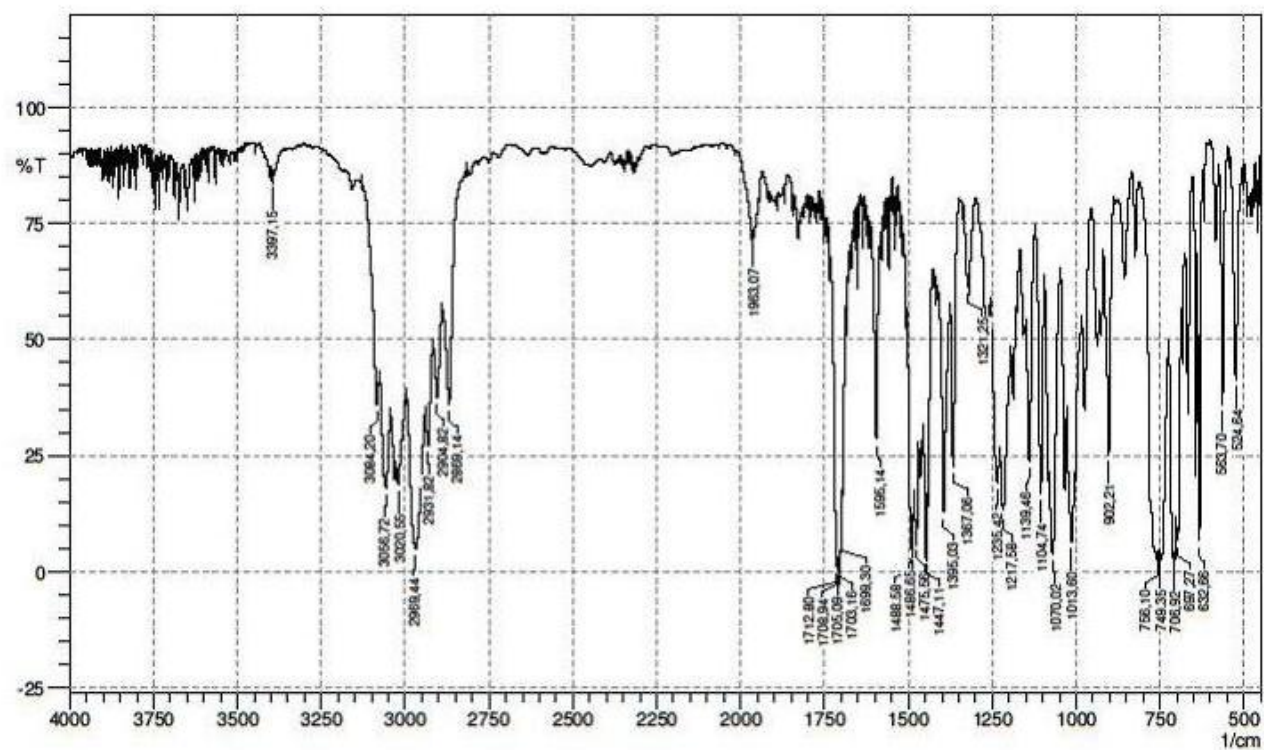

K-38

2,2-Dimethyl-1-(1- triphenylmethylaziridine-2-yl)-propane-1-one 5d

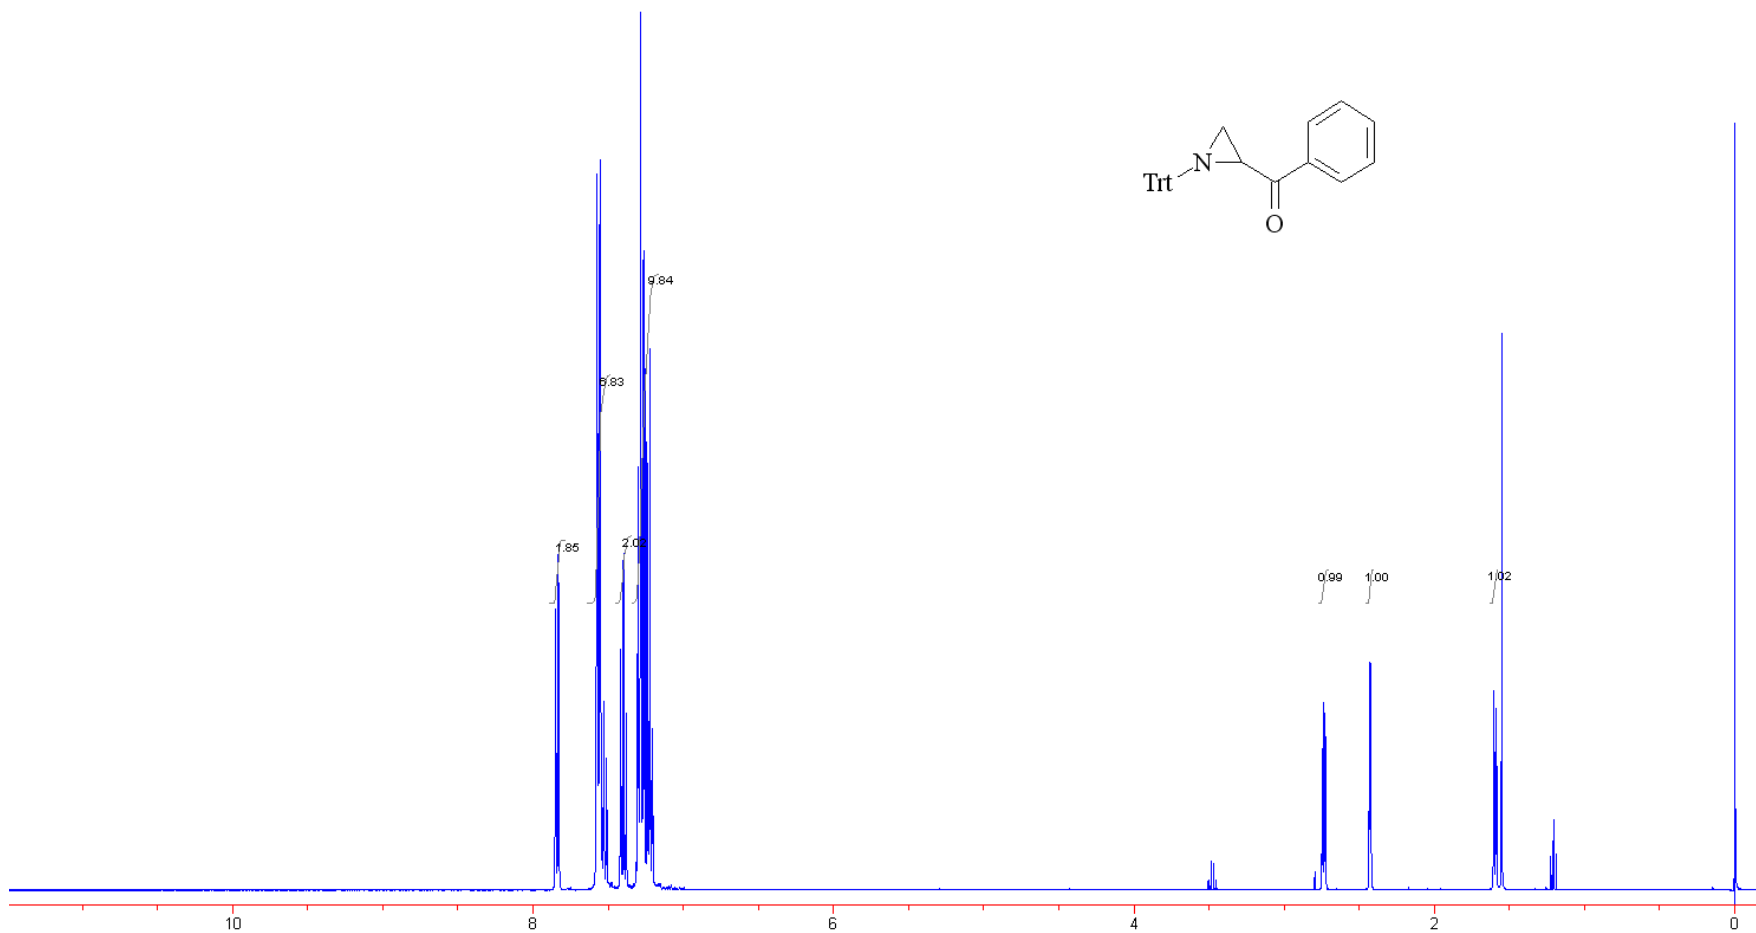

(Triphenylmethylaziridine-2-yl)-phenyl-methanone 5e



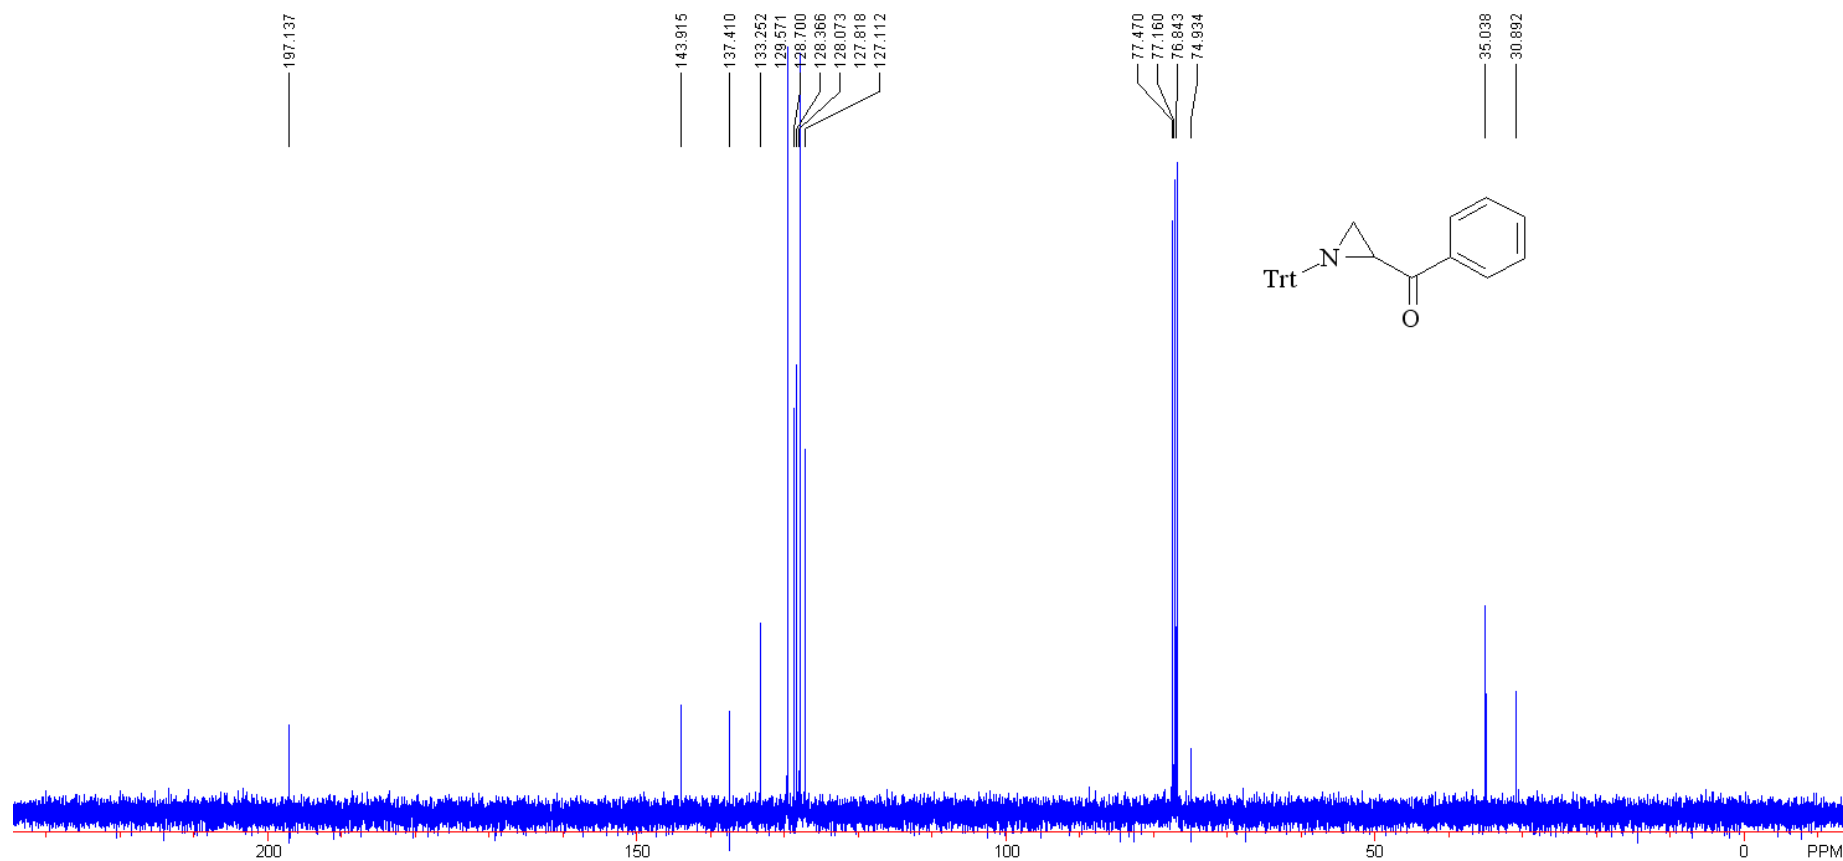

(Triphenylmethyllaziridine-2-yl)-phenyl-methanone 5e

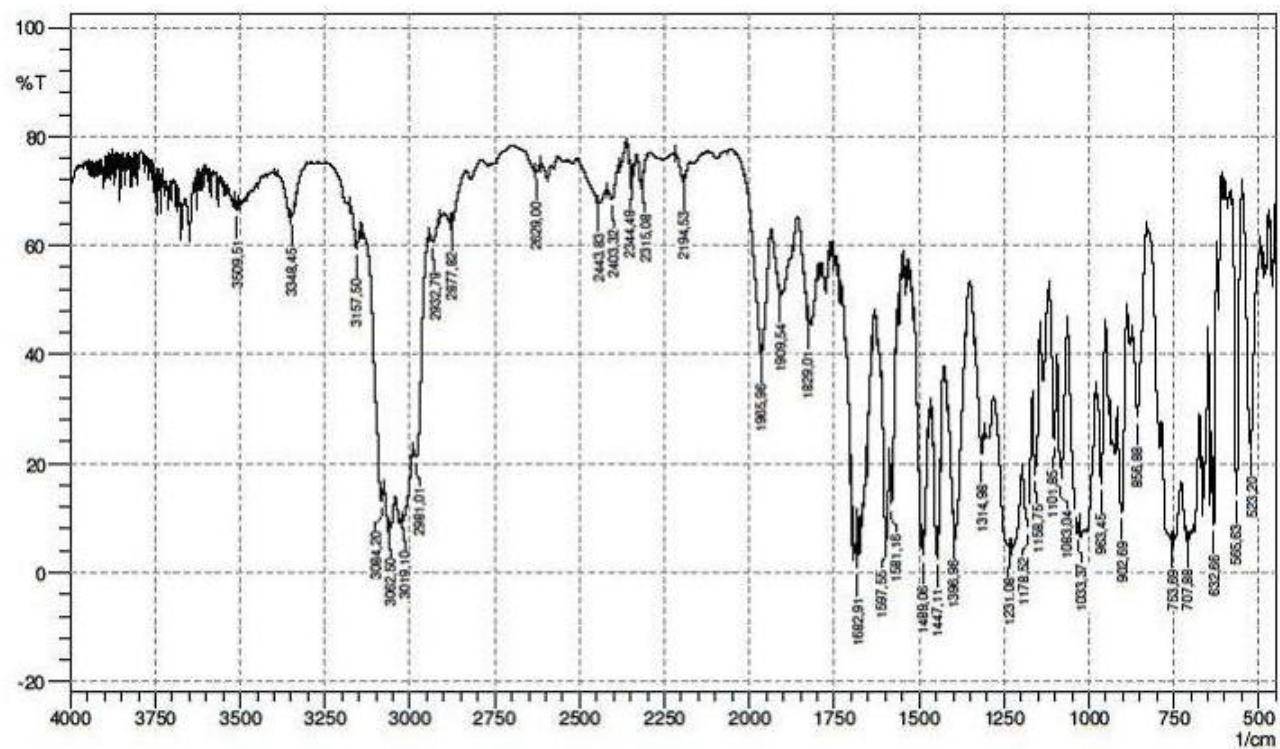

K41

(Triphenylmethyllaziridine-2-yl)-phenyl-methanone 5e

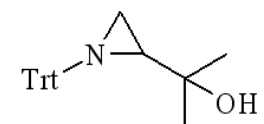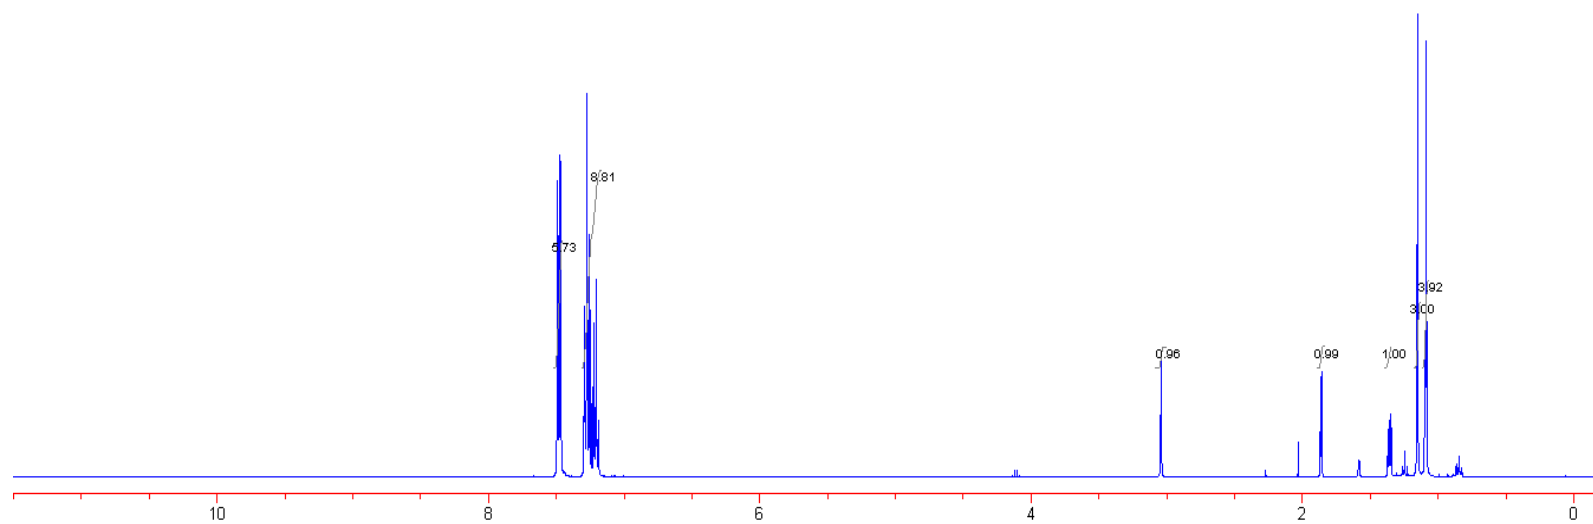

**2-(1-Triphenylmethylaziridine-2-yl)-propan-2-ol 6a**

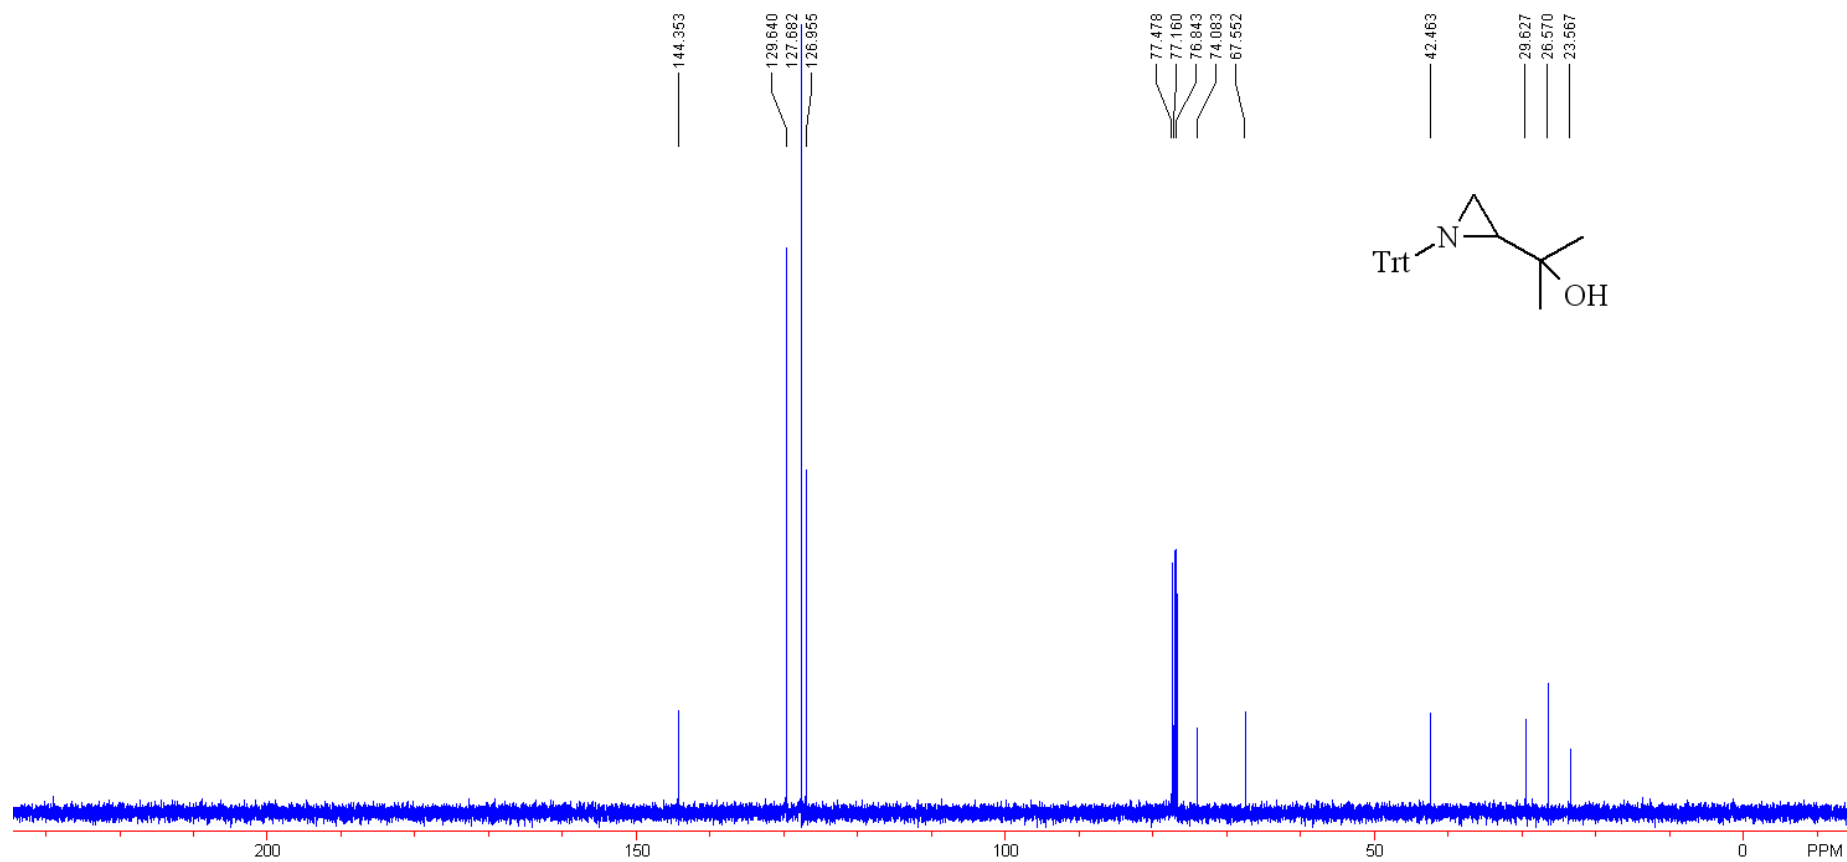

2-(1-Triphenylmethylaziridine-2-yl)-propan-2-ol 6a

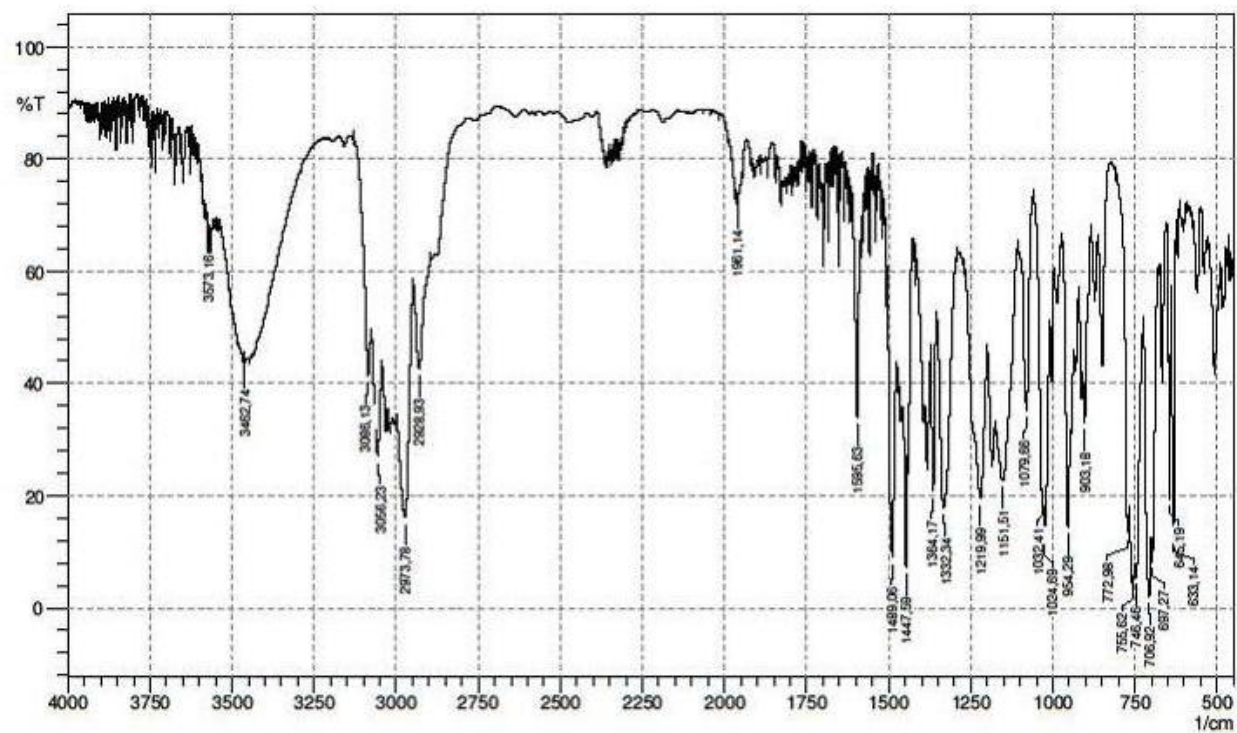

X1009F2

2-(1-Triphenylmethylaziridine-2-yl)-propan-2-ol 6a

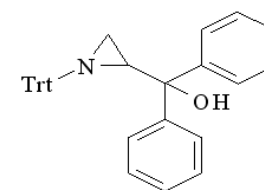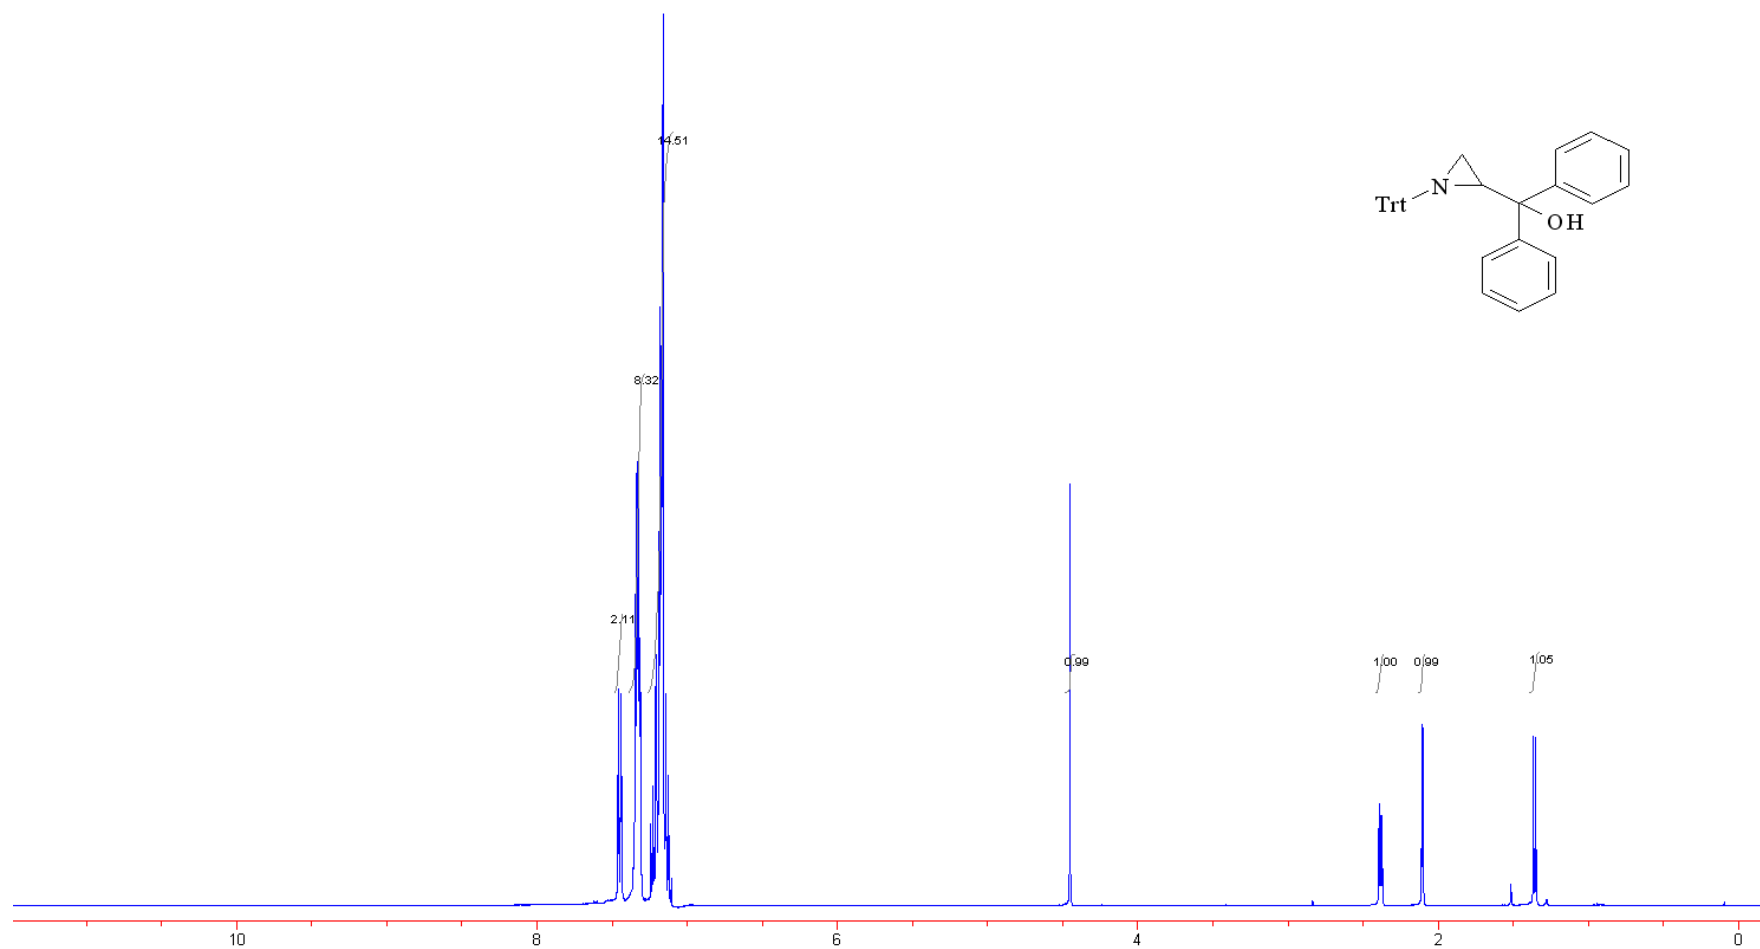

Diphenyl-(1-triphenylmethylaziridine-2-yl)-methanol 6b

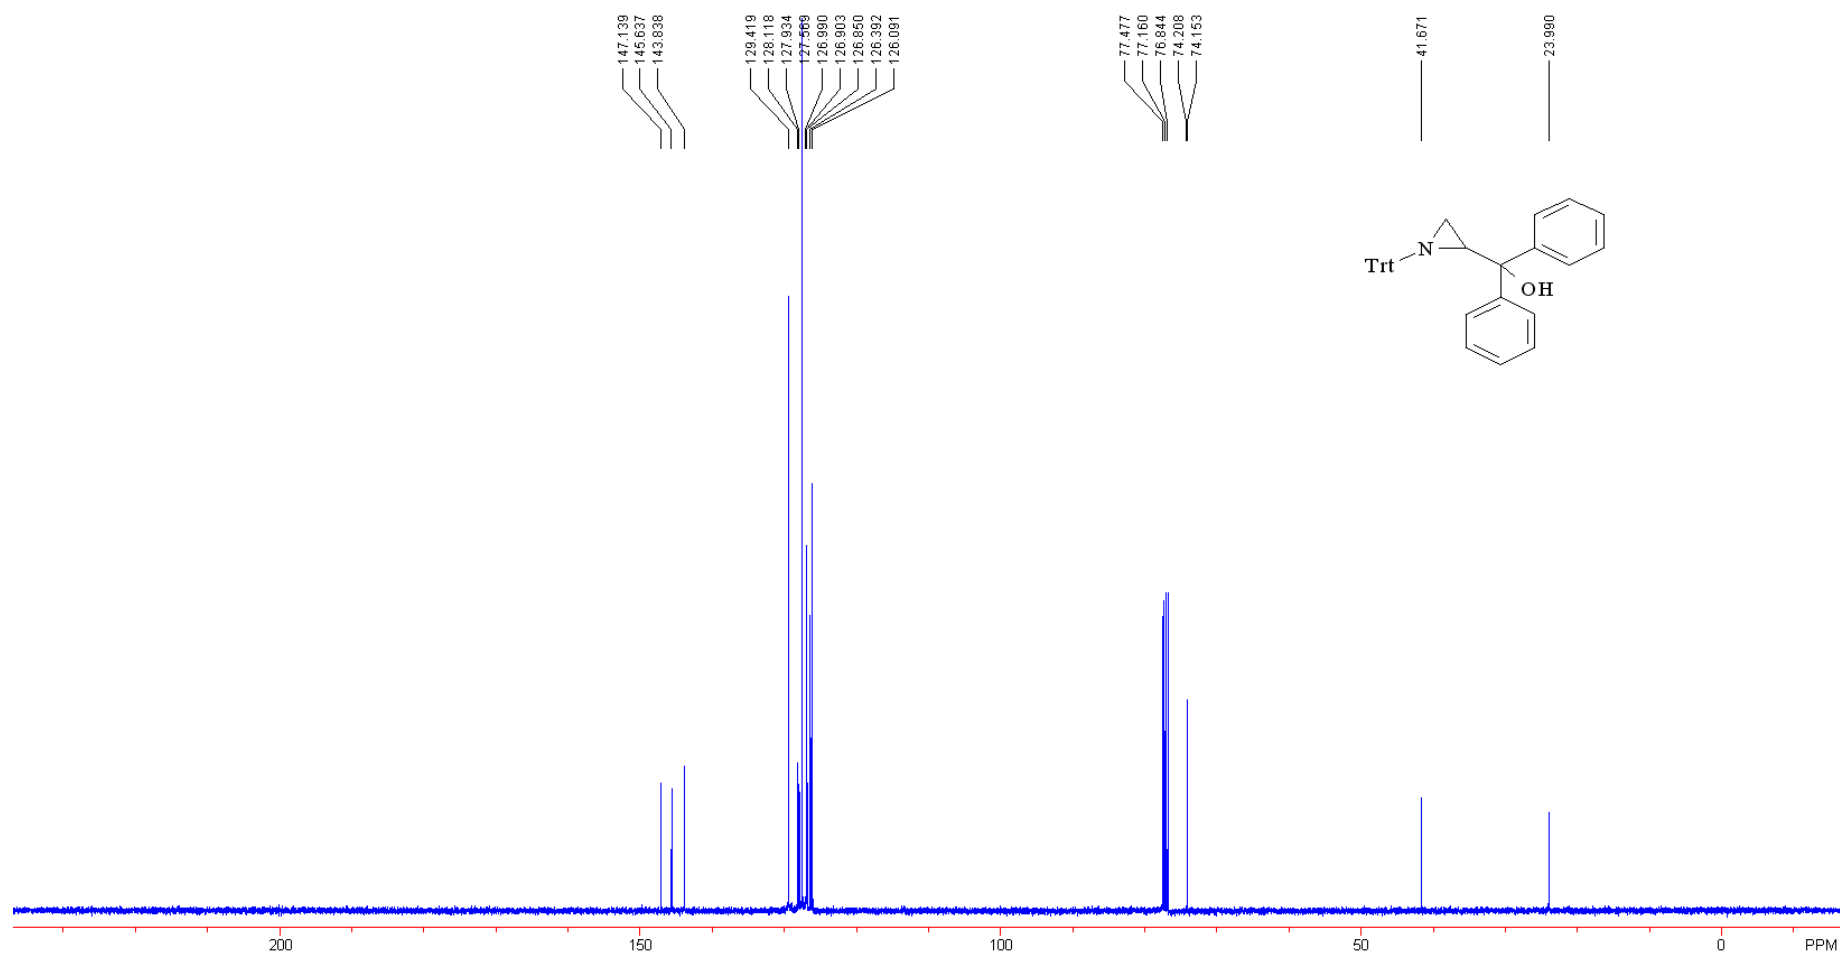

Diphenyl-(1-triphenylmethylaziridine-2-yl)-methanol 6b

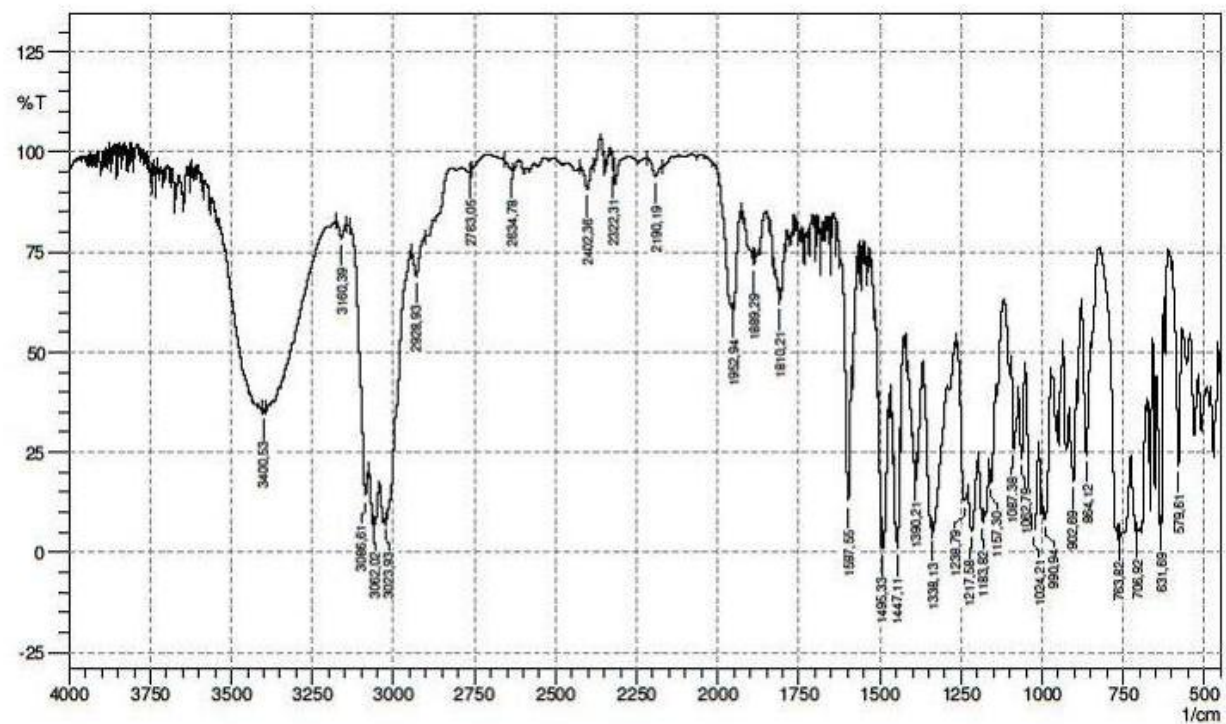

K46

Diphenyl-(1-triphenylmethylaziridine-2-yl)-methanol 6b



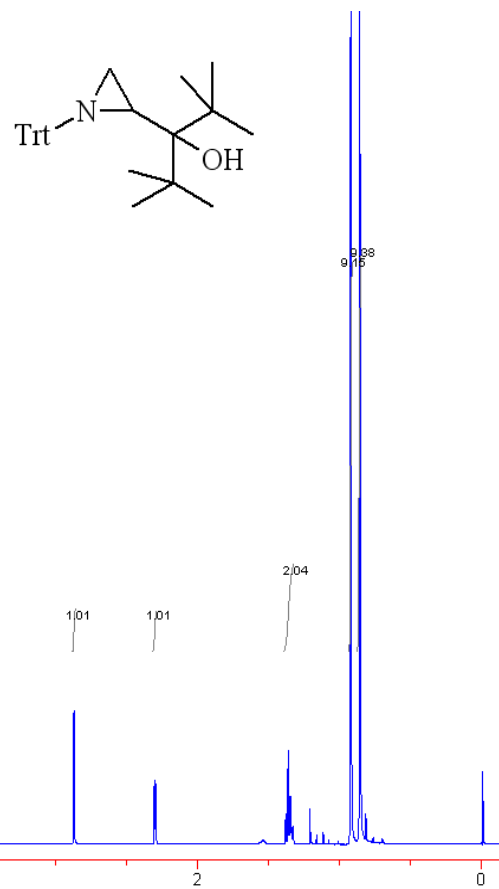

**2,2,4,4-Tetramethyl-(1-triphenylmethylaziridine-2-yl)-pentane-3-ol 6c**

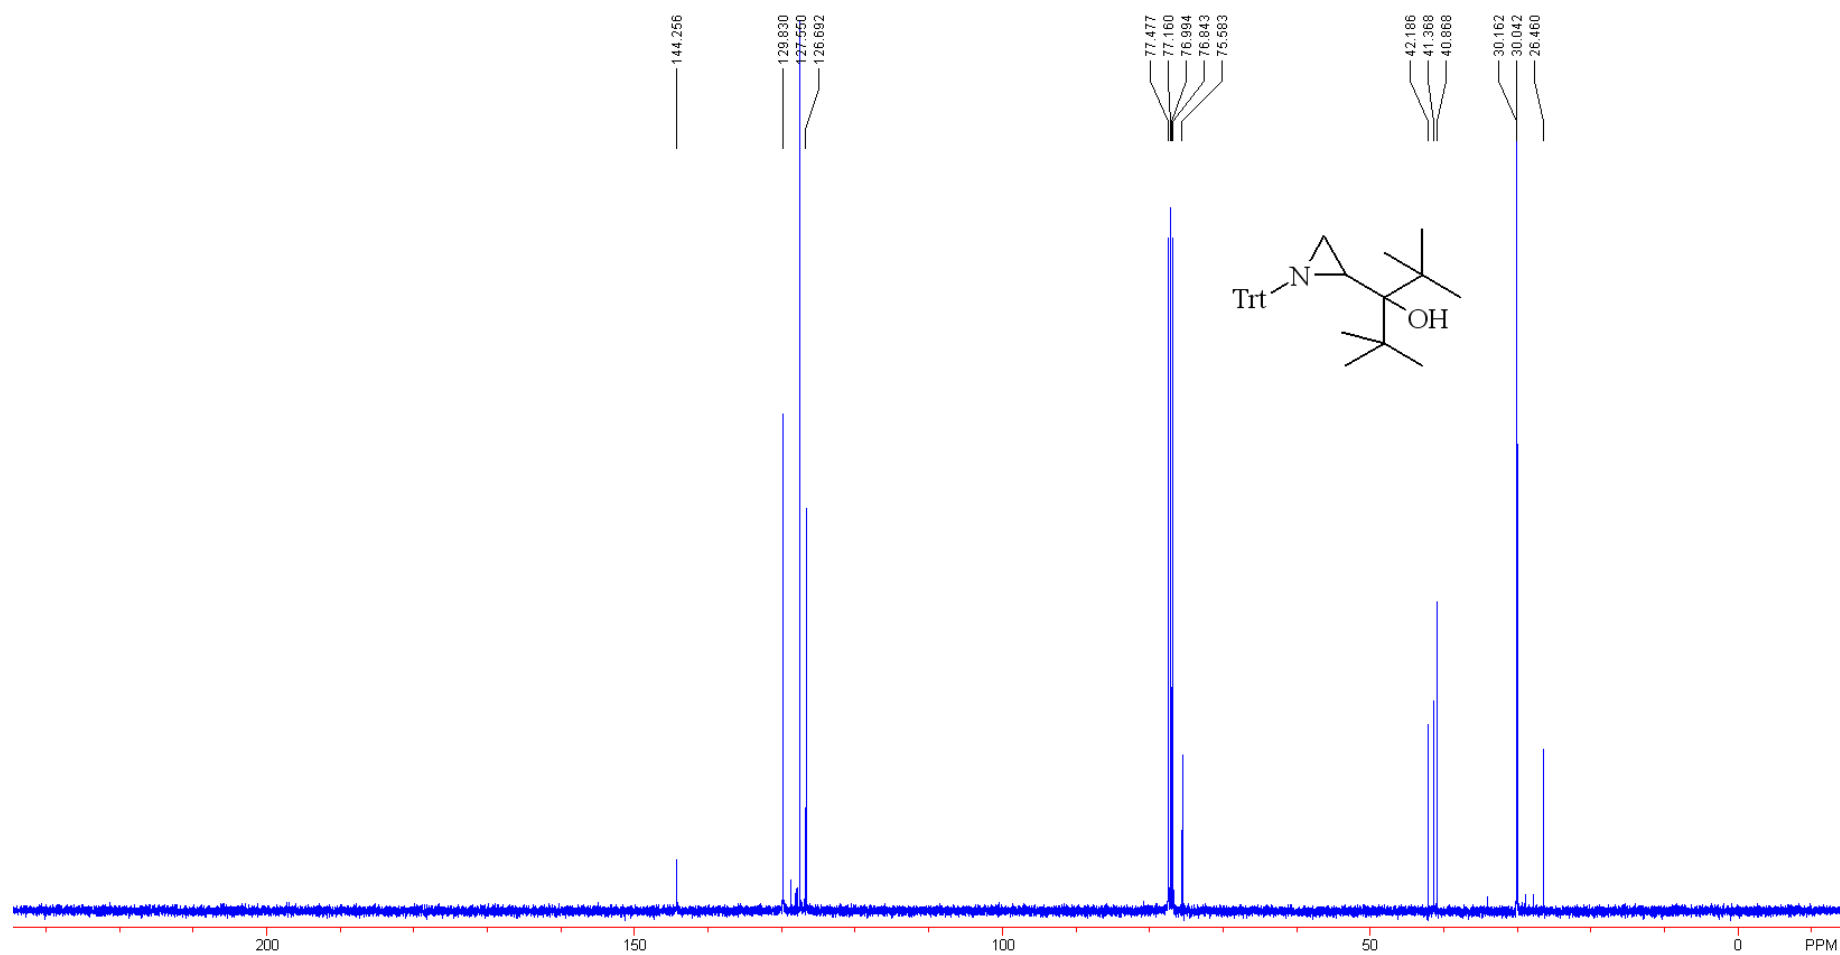

2,2,4,4-Tetramethyl-(1-triphenylmethylaziridine-2-yl)-pentane-3-ol 6c

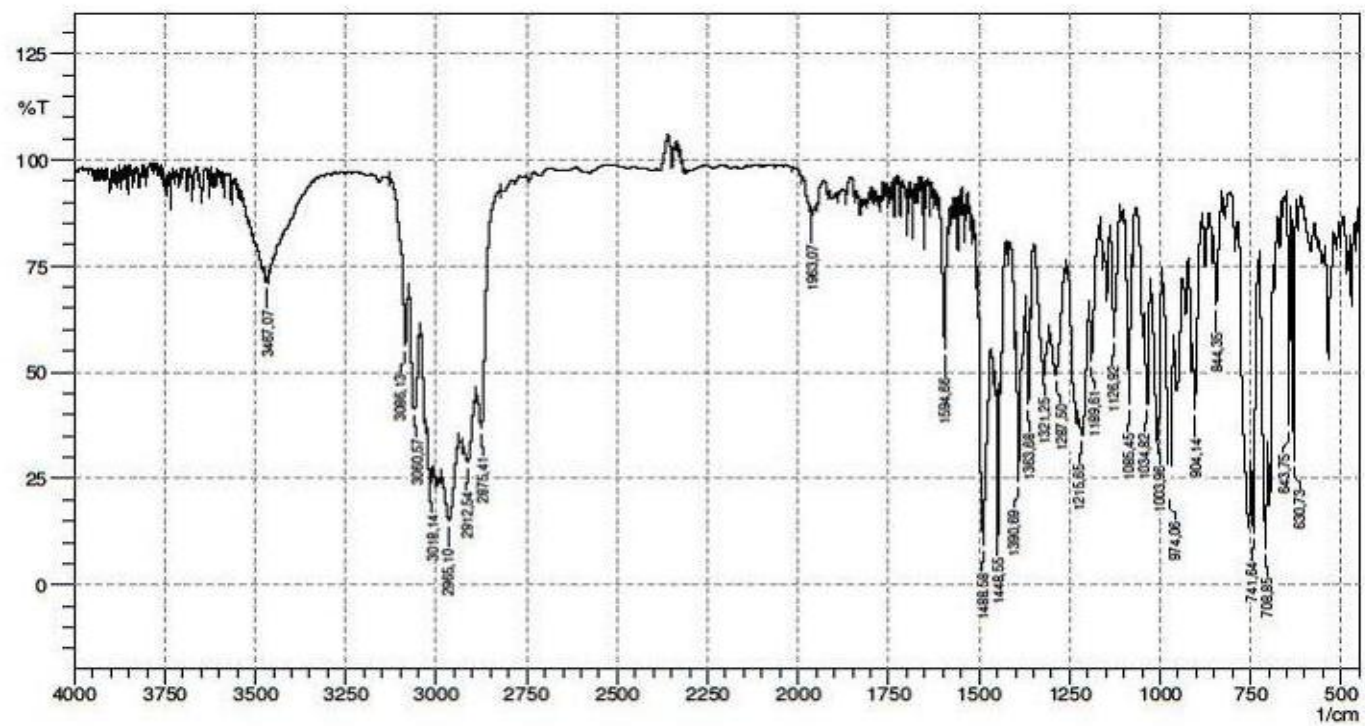

K34

2,2,4,4-Tetramethyl-(1-triphenylmethyllaziridine-2-yl)-pentane-3-ol 6c

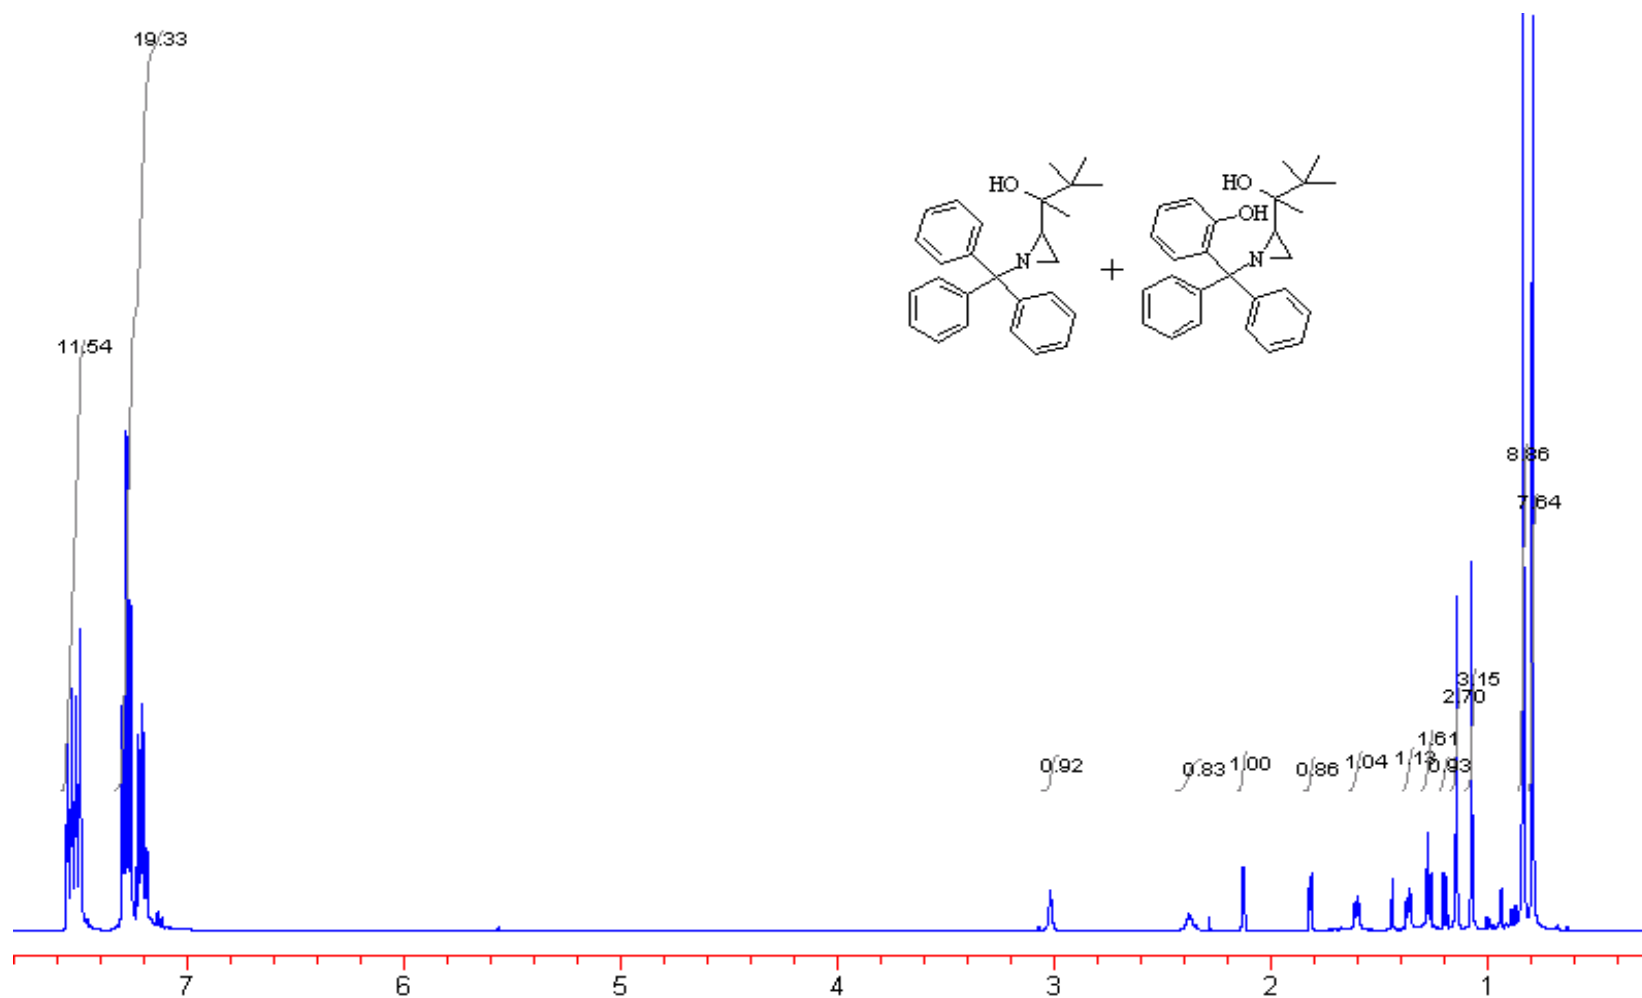

Mixture of 3,3-Dimethyl-2-(1-trityl-aziridin-2-yl)-butan-2-ol 6d (mixture of diastereomers) and phenol 6d1

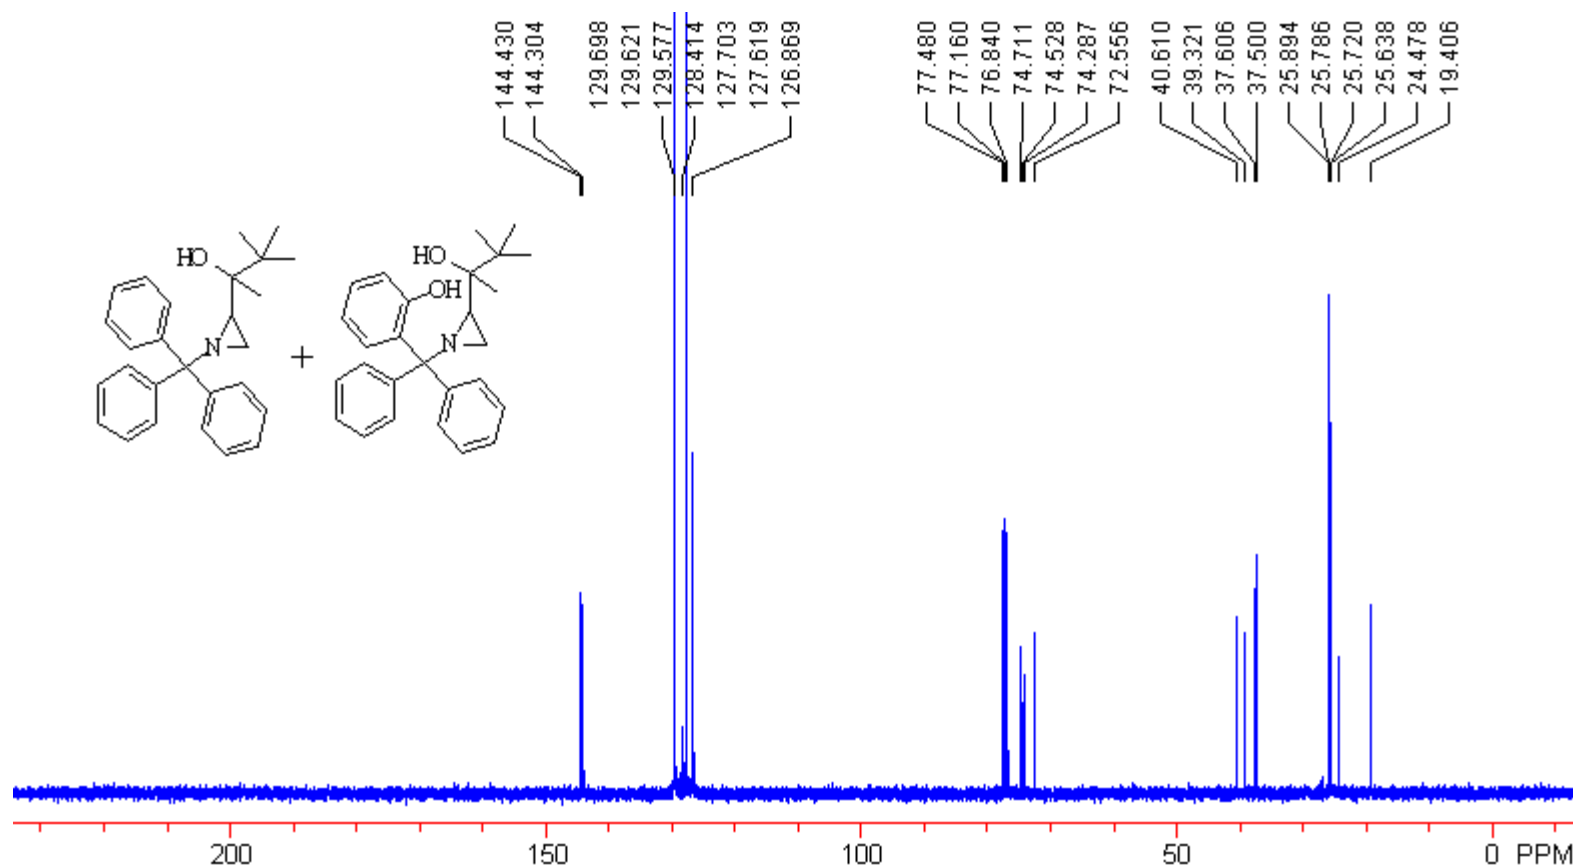

Mixture of 3,3-Dimethyl-2-(1-trityl-aziridin-2-yl)-butan-2-ol 6d (mixture of diastereomers) and phenol 6d1

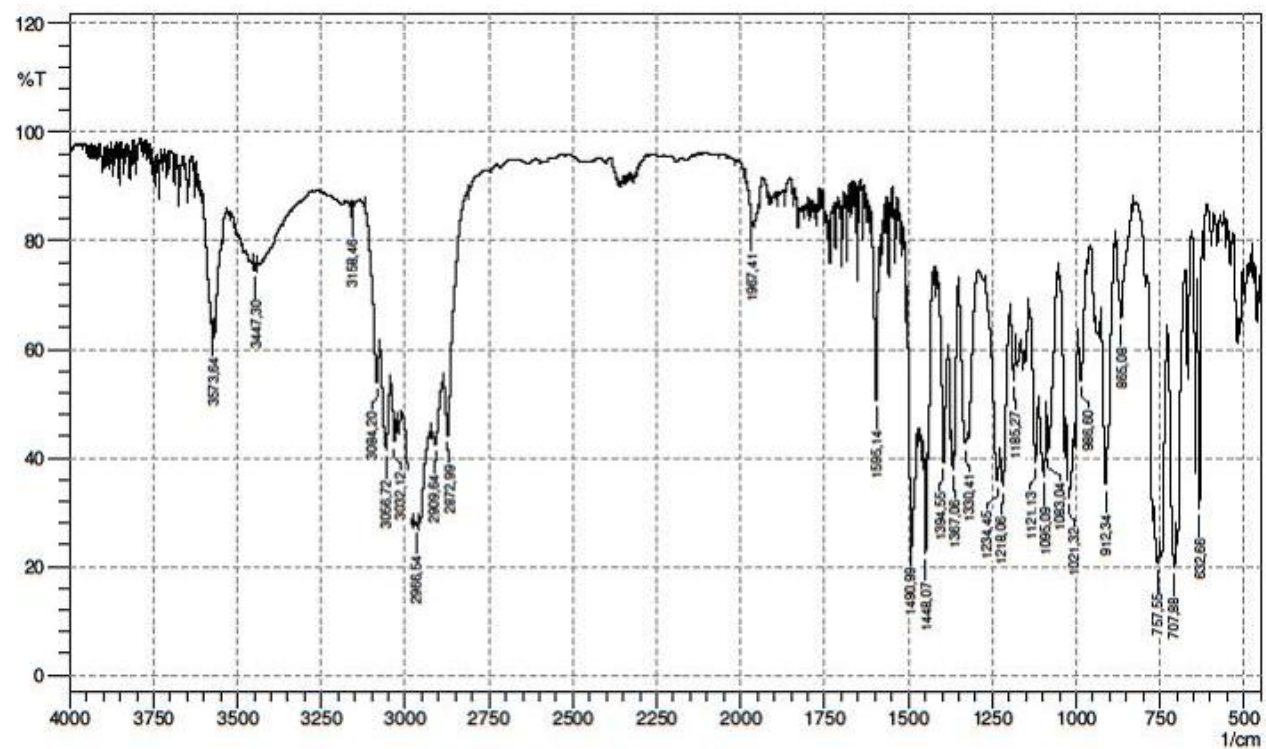

K-37

Mixture of 3,3-Dimethyl-2-(1-trityl-aziridin-2-yl)-butan-2-ol 6d (mixture of diastereomers) and phenol 6d1

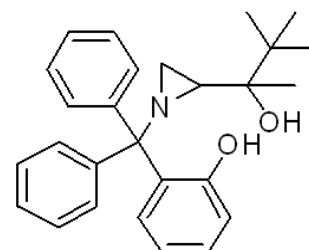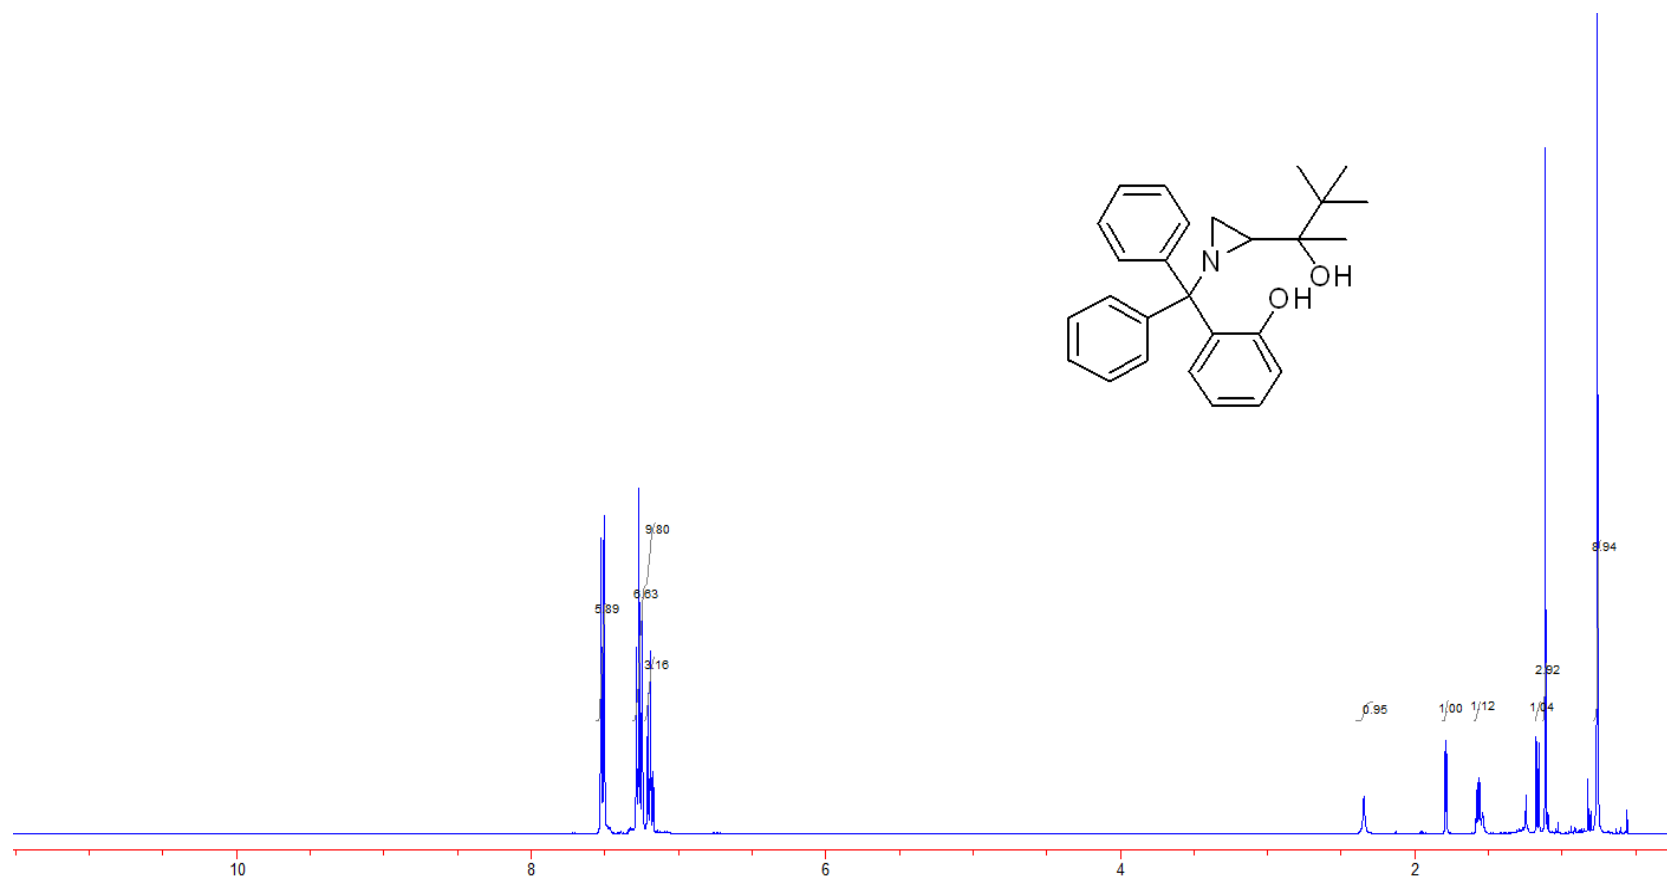

**2-[[2-(1-Hydroxy-1,2,2-trimethyl-propyl)-aziridin-1-yl]diphenyl-methyl]phenol (mixture of diastereomers) 6d1**

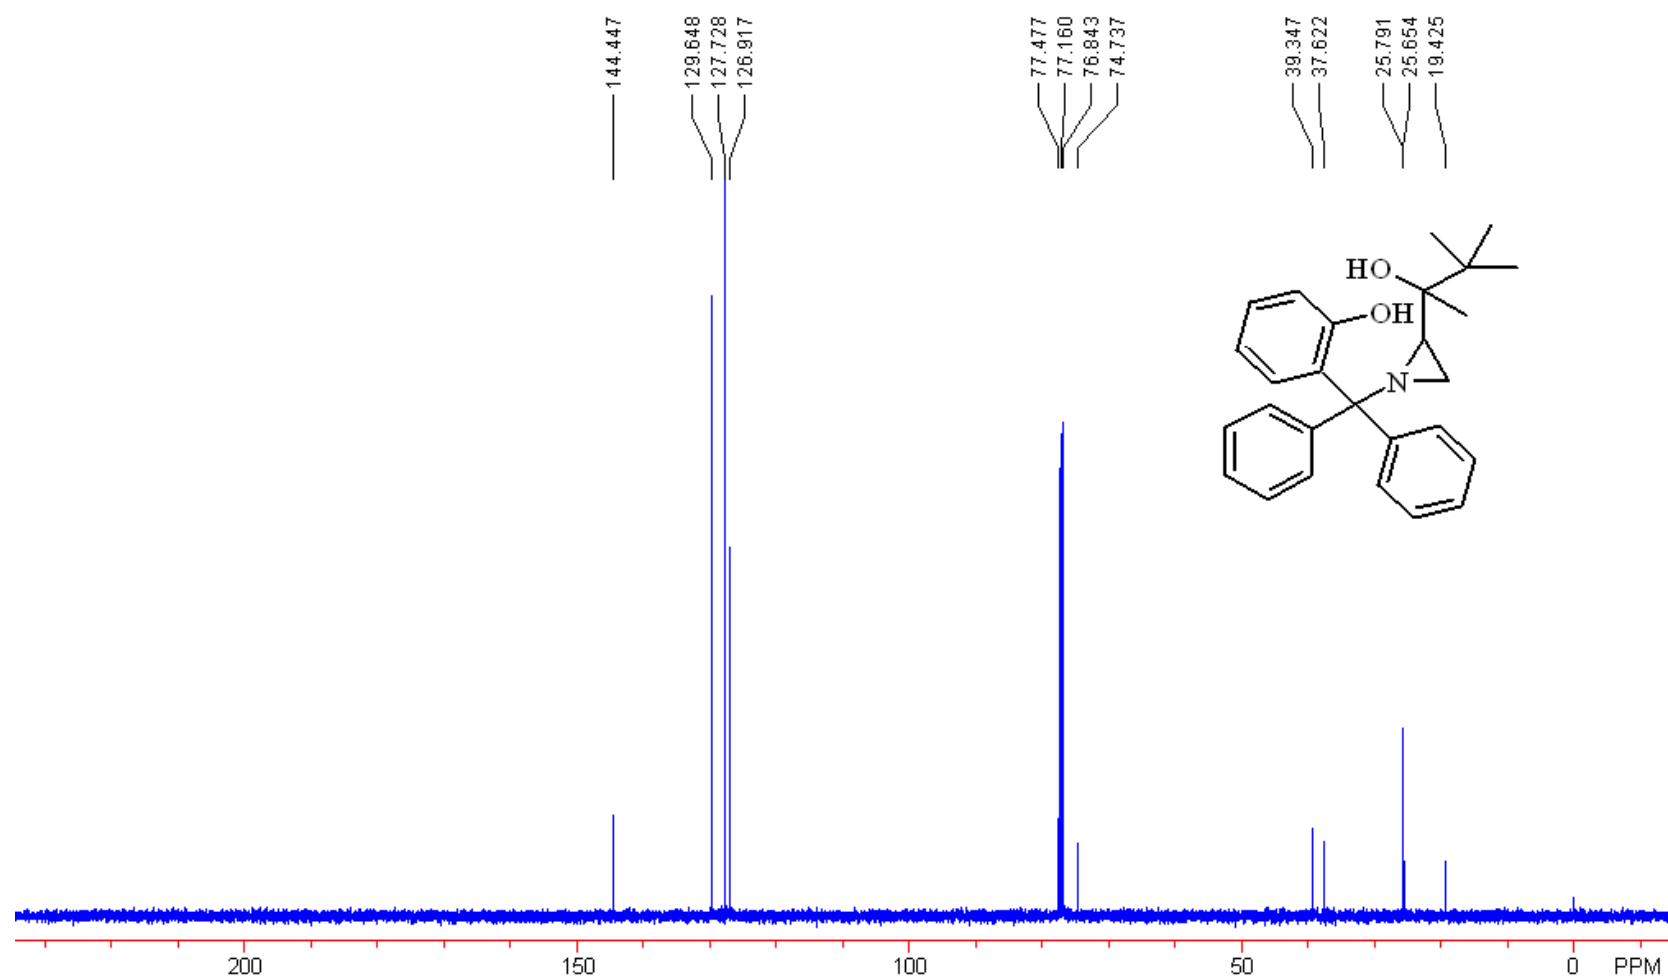

2-[[2-(1-Hydroxy-1,2,2-trimethyl-propyl)-aziridin-1-yl]diphenyl-methyl]phenol (mixture of diastereomers) 6d1



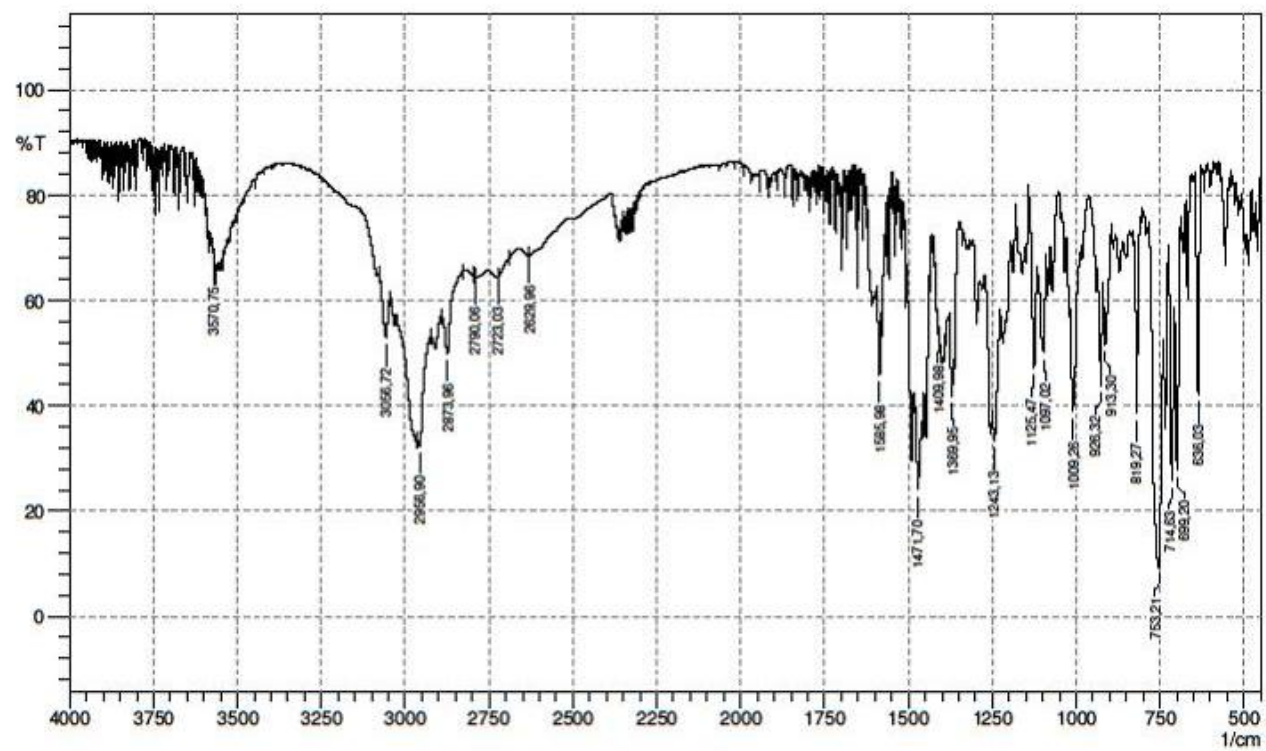

K-44

2-[[2-(1-Hydroxy-1,2,2-trimethyl-propyl)-aziridin-1-yl]diphenyl-methyl]phenol (mixture of diastereomers) 6d1

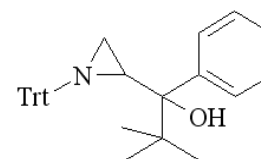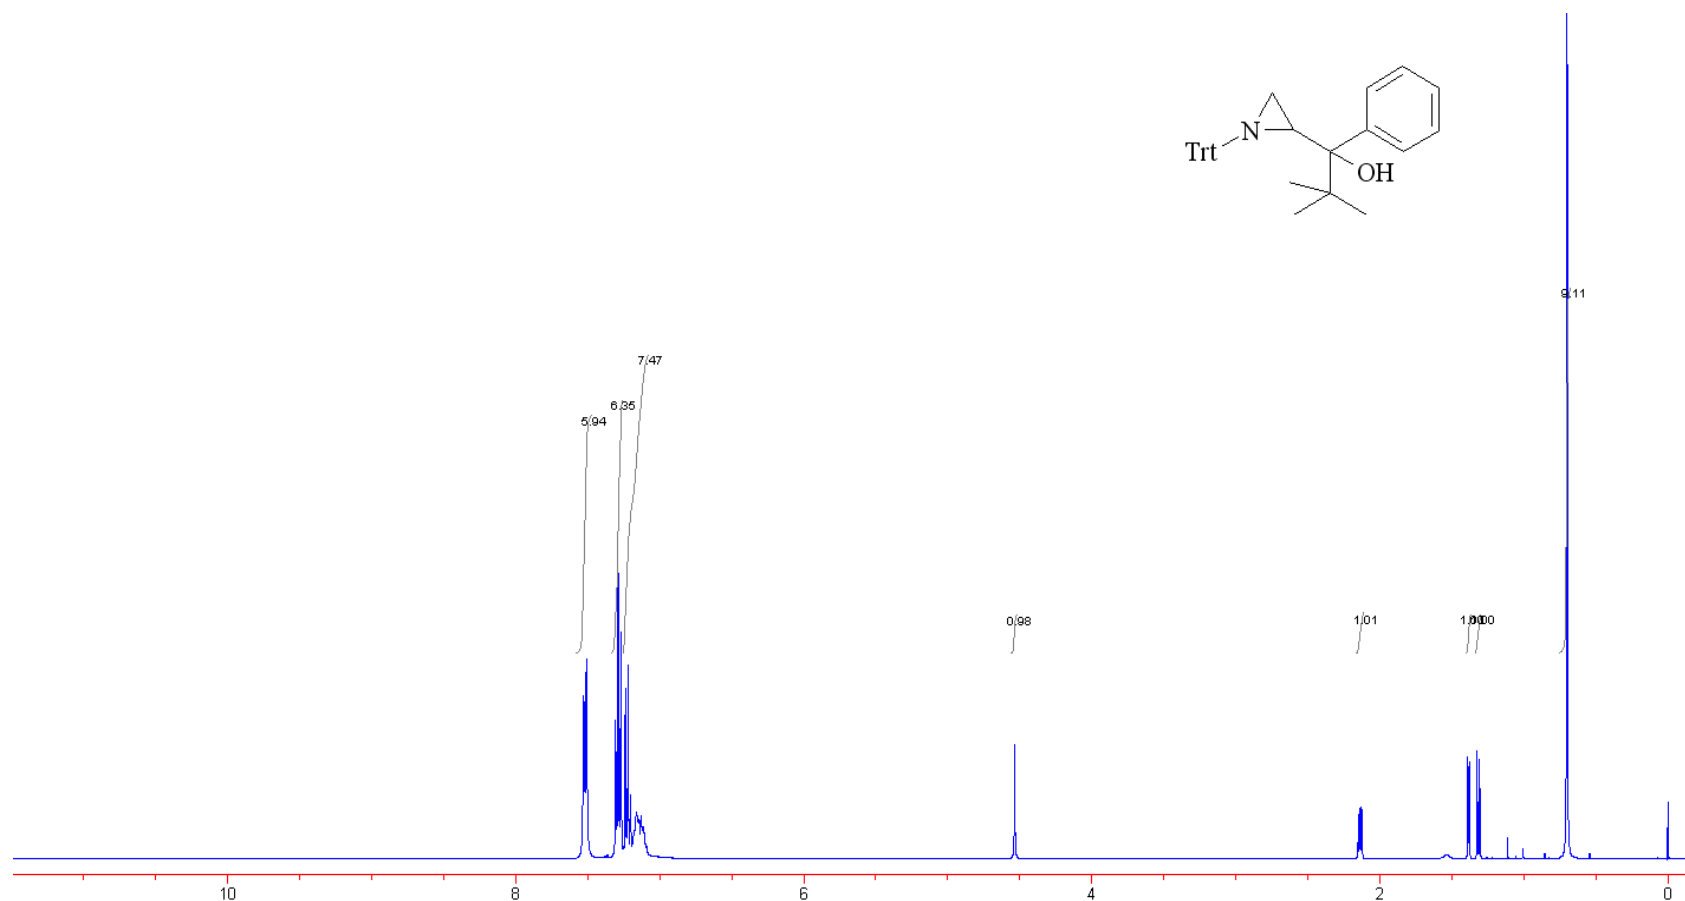

**2,2-Dimethyl-1-phenyl-(1-triphenylmethylaziridine-2-yl)-propane-1-ol (mixture of diastereomers) 6e**

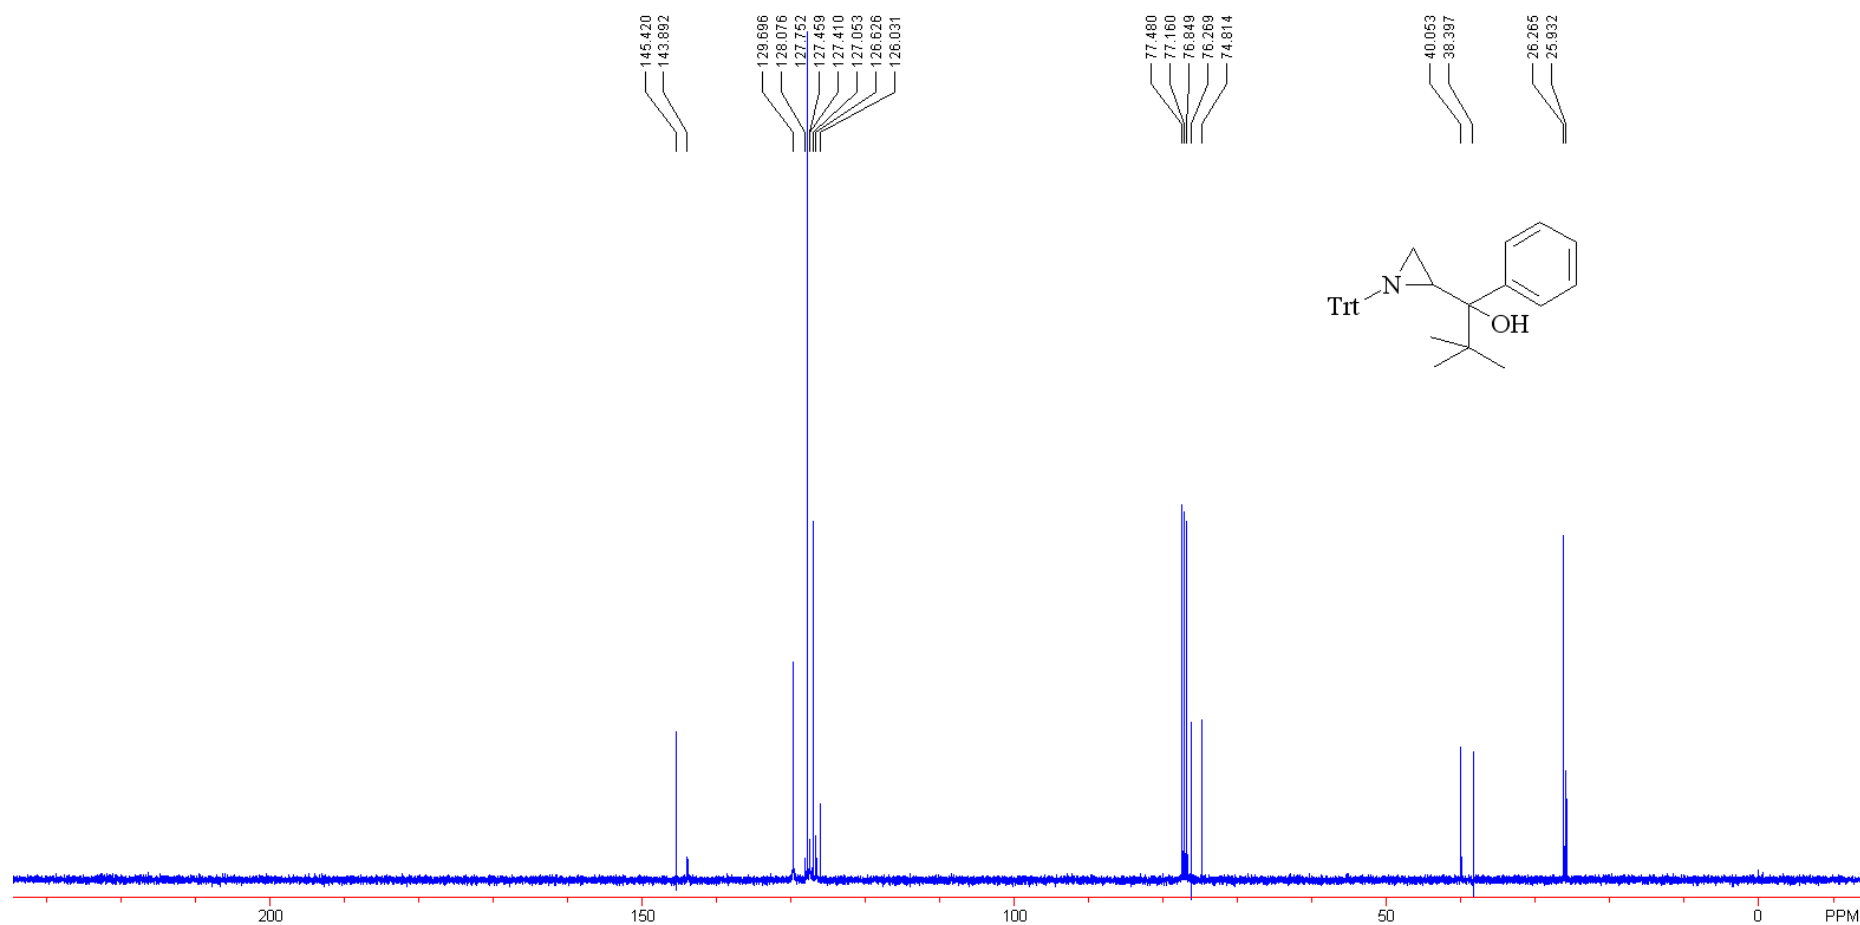

2,2-Dimethyl-1-phenyl-(1-triphenylmethylaziridine-2-yl)-propane-1-ol (mixture of diastereomers) 6e

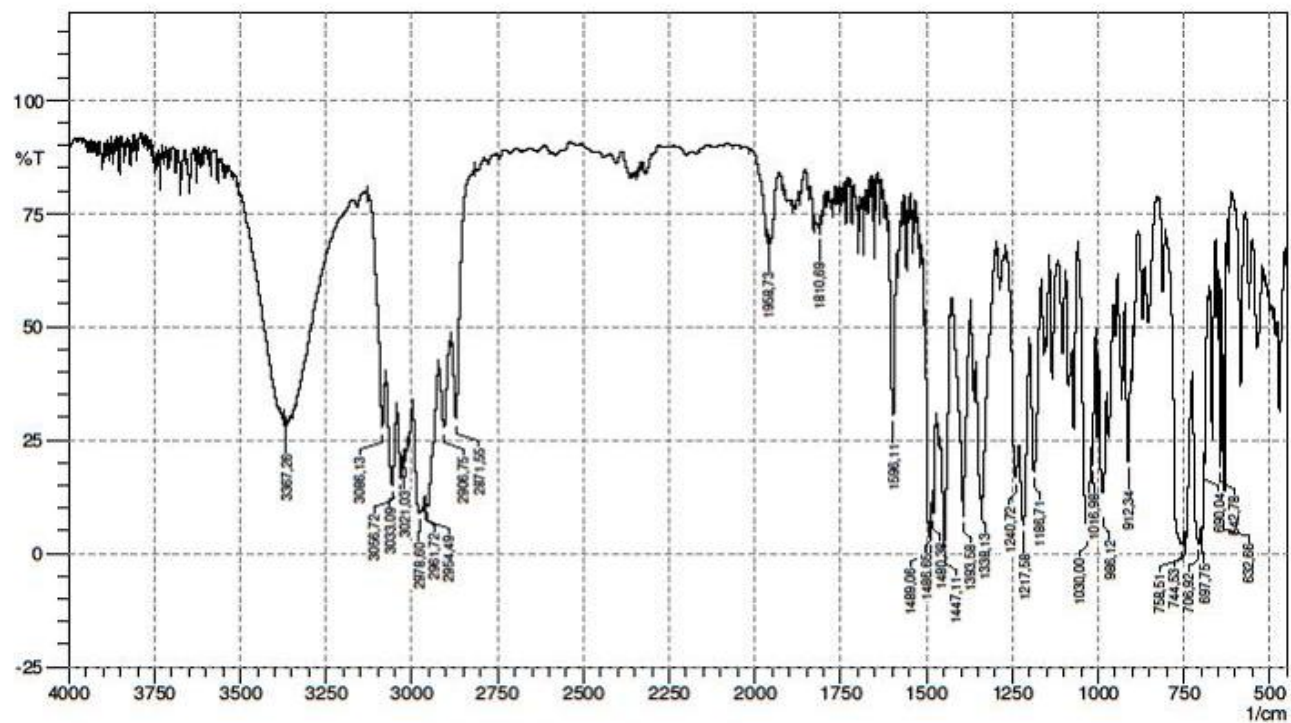

K45KD

2,2-Dimethyl-1-phenyl-(1-triphenylmethylaziridine-2-yl)-propane-1-ol (mixture of diastereomers) 6e

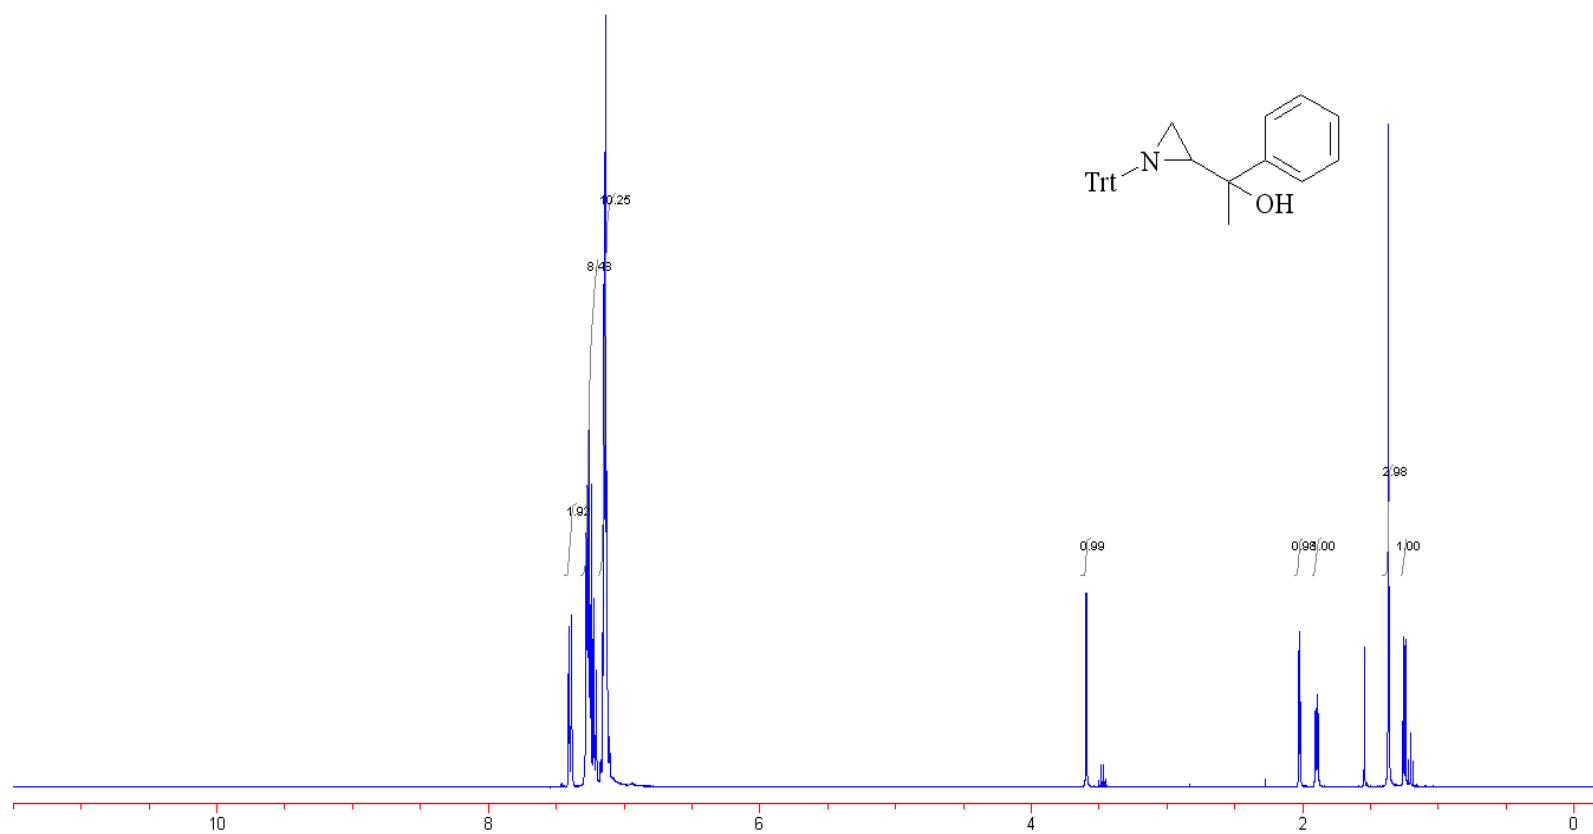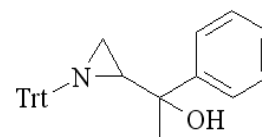

**1-Phenyl-(1-triphenylmethylaziridine-2-yl)-ethanol (mixture of diastereomers)**

**6f**

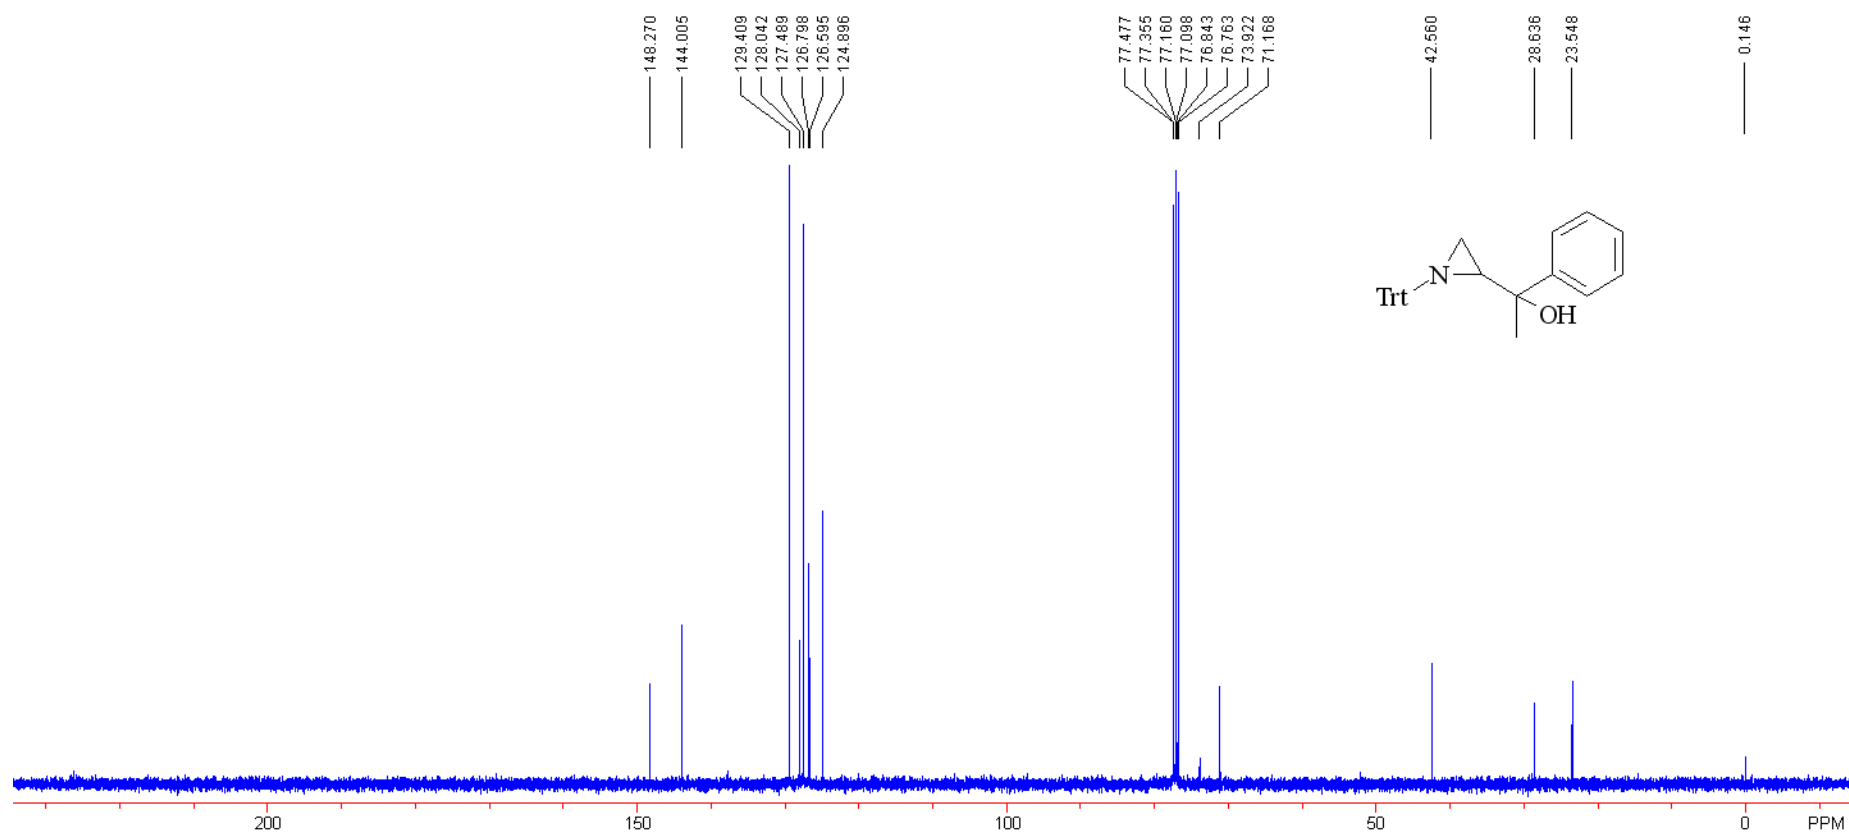

**1-Phenyl-(1-triphenylmethylaziridine-2-yl)-ethanol (mixture of diastereomers)**

**6f**

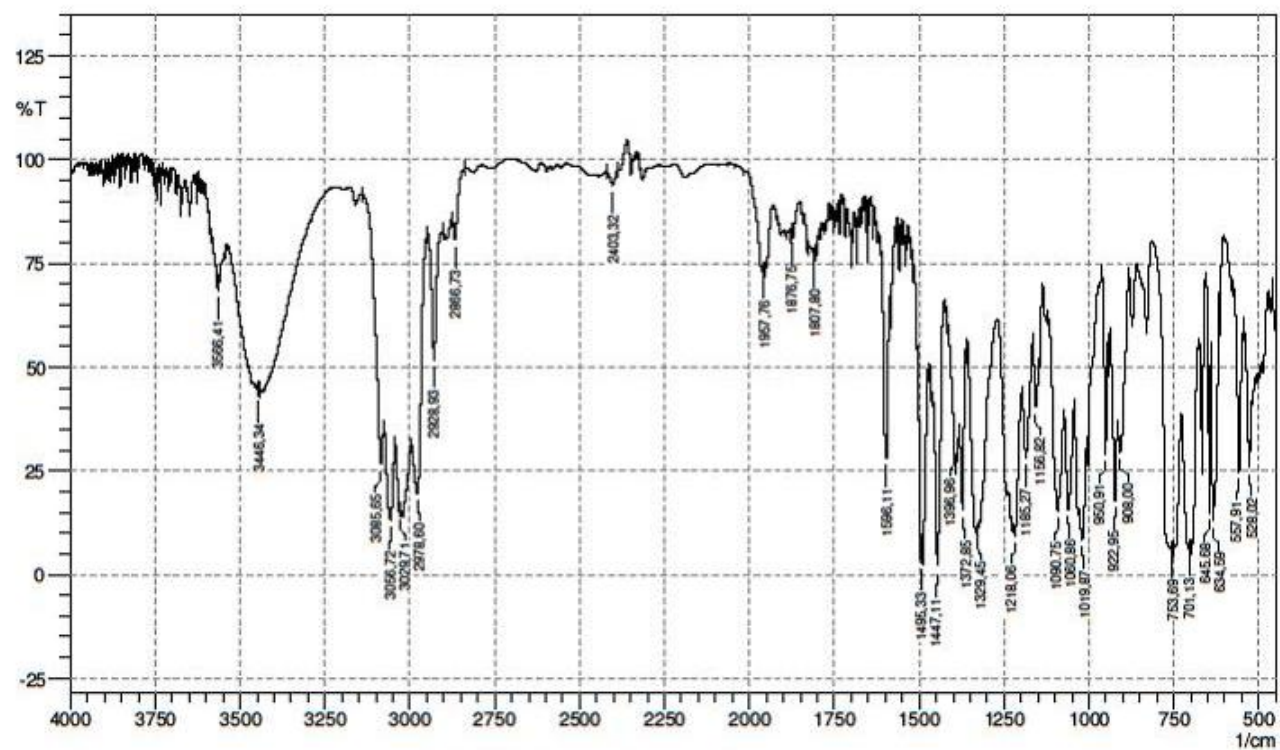

K42

1-Phenyl-(1-triphenylmethylaziridine-2-yl)-ethanol (mixture of diastereomers) 6f

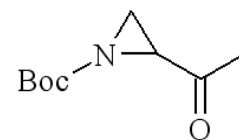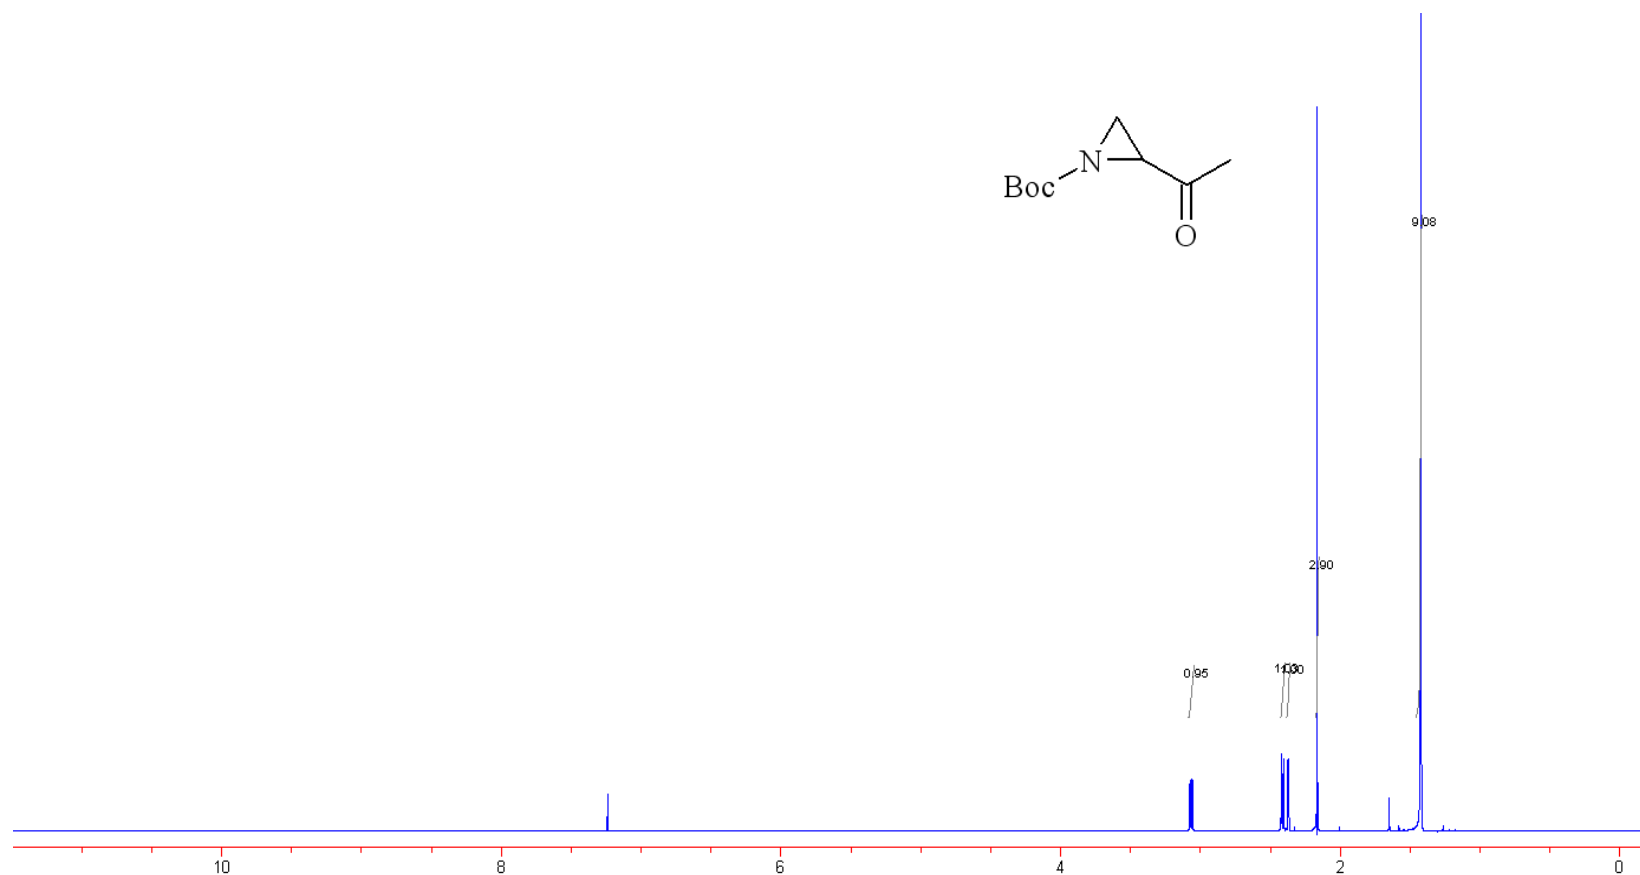

(1-*tert*-Butyloxycarbonylaziridine-2-yl)-methyl-methanone 7a



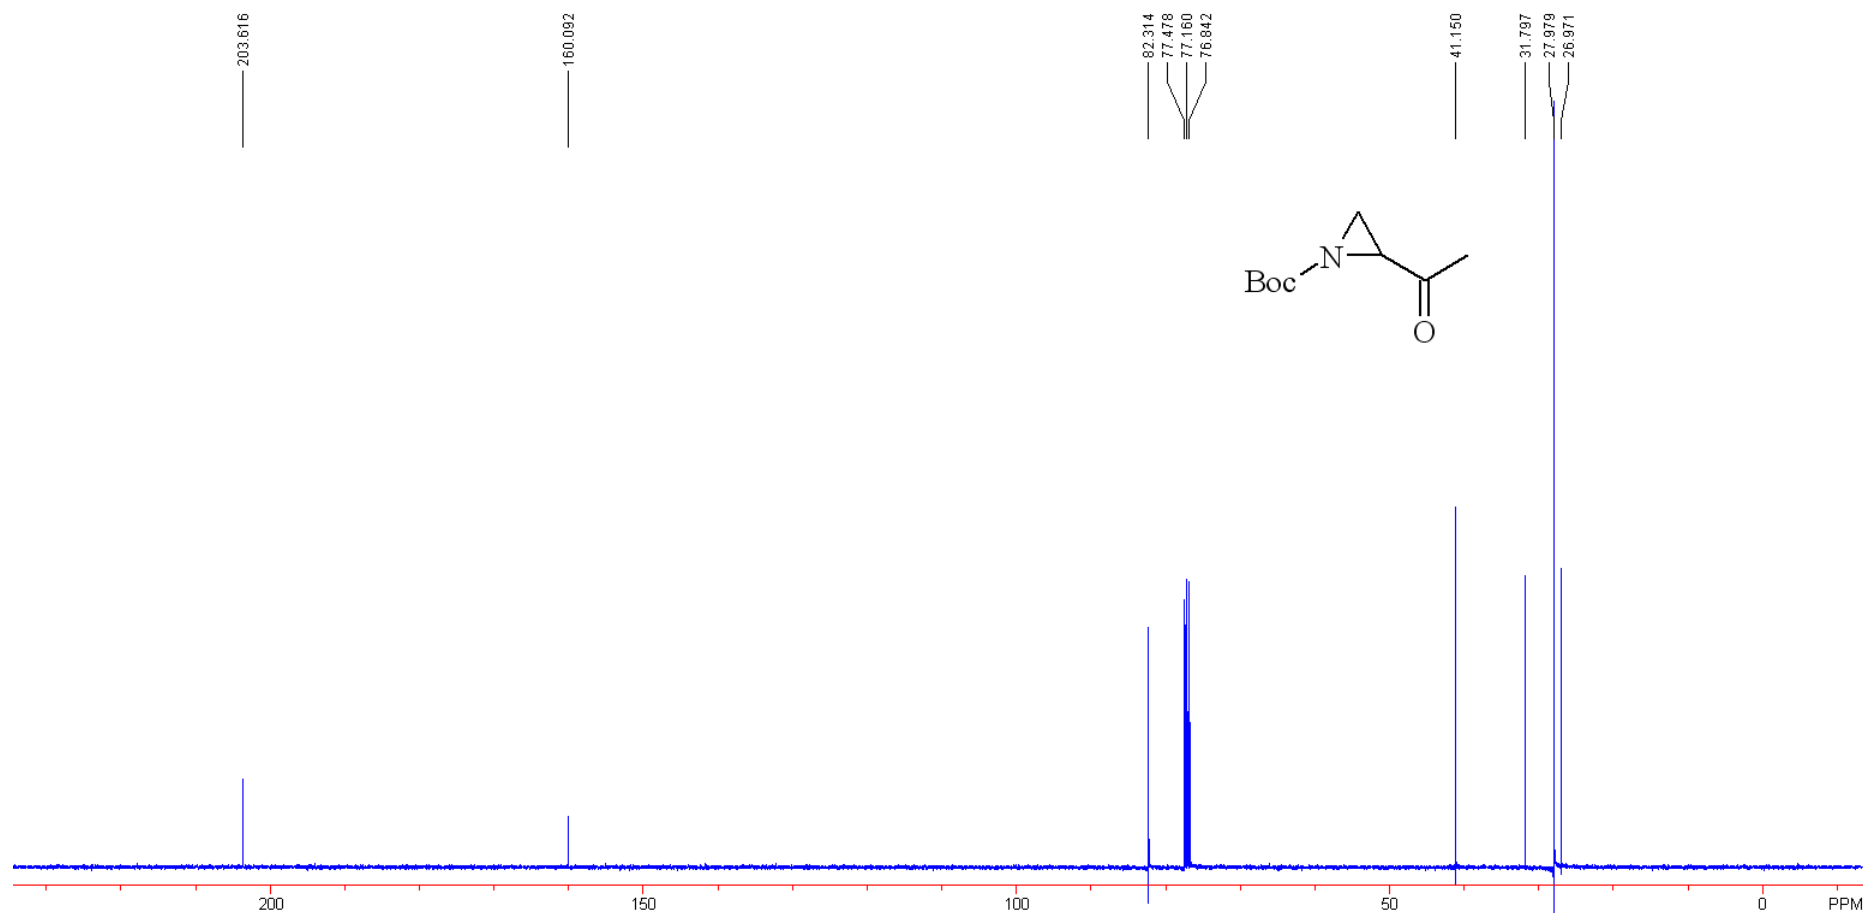

(1-*tert*-Butyloxycarbonylaziridine-2-yl)-methyl-methanone 7a

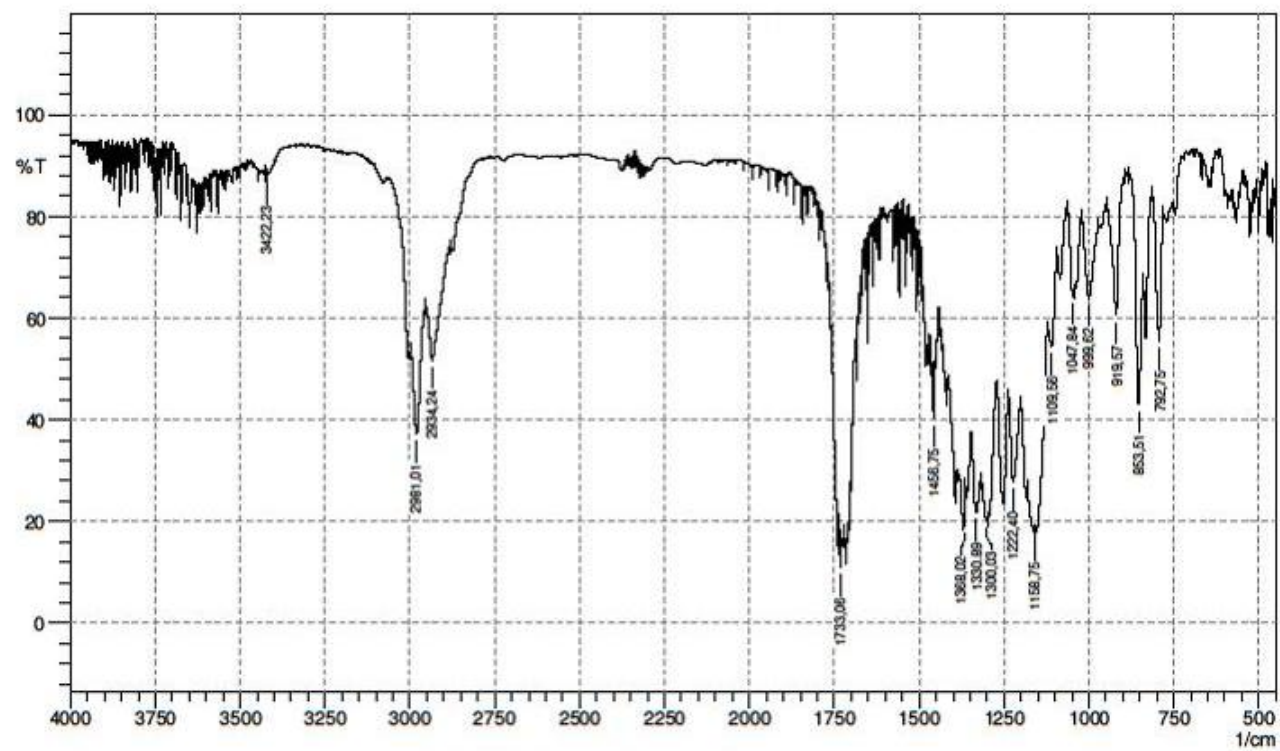

X1019F1

(1-*tert*-Butyloxycarbonylaziridine-2-yl)-methyl-methanone 7a

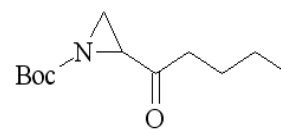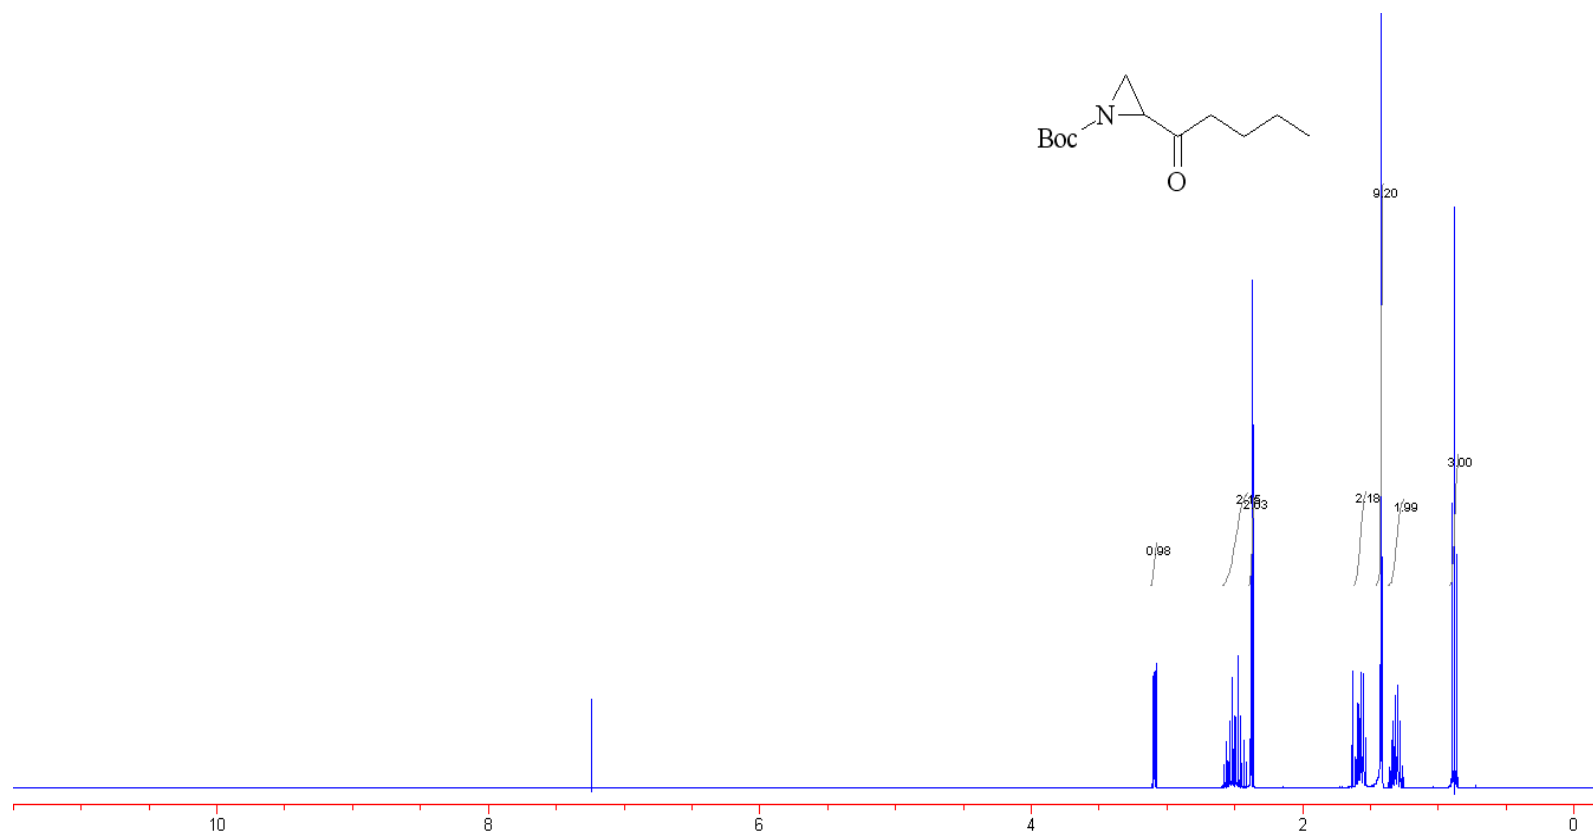

**(1-*tert*-Butyloxycarbonylaziridine-2-yl)-n-butyl-methanone 7b**

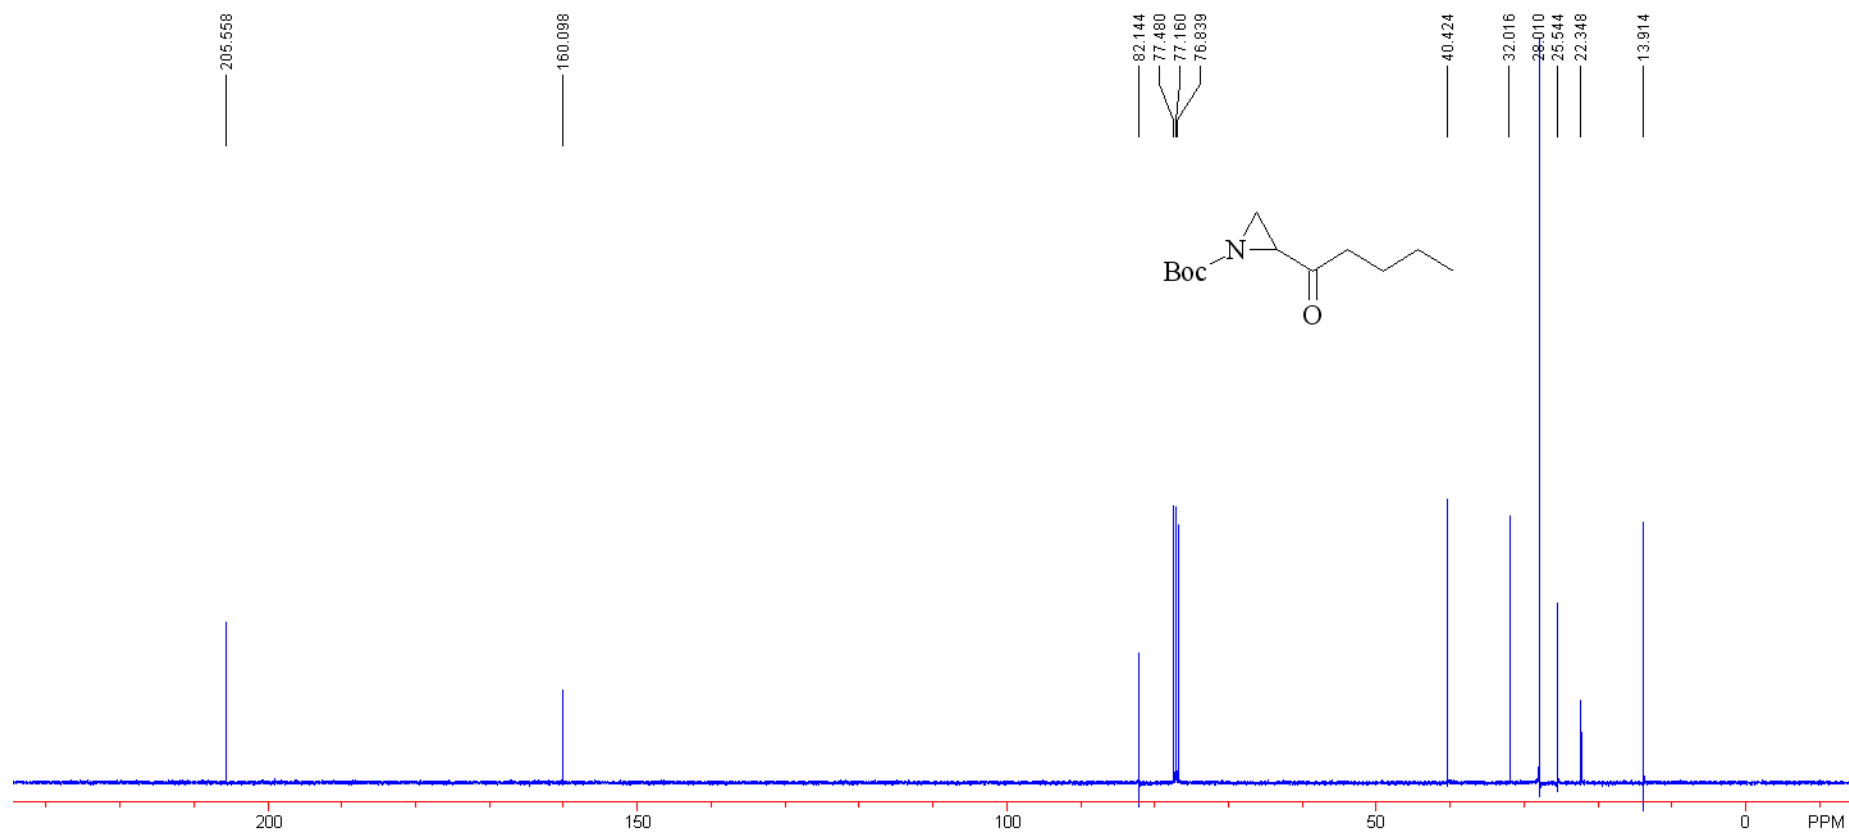

**(1-*tert*-Butyloxycarbonylaziridine-2-yl)-*n*-butyl-methanone 7b**

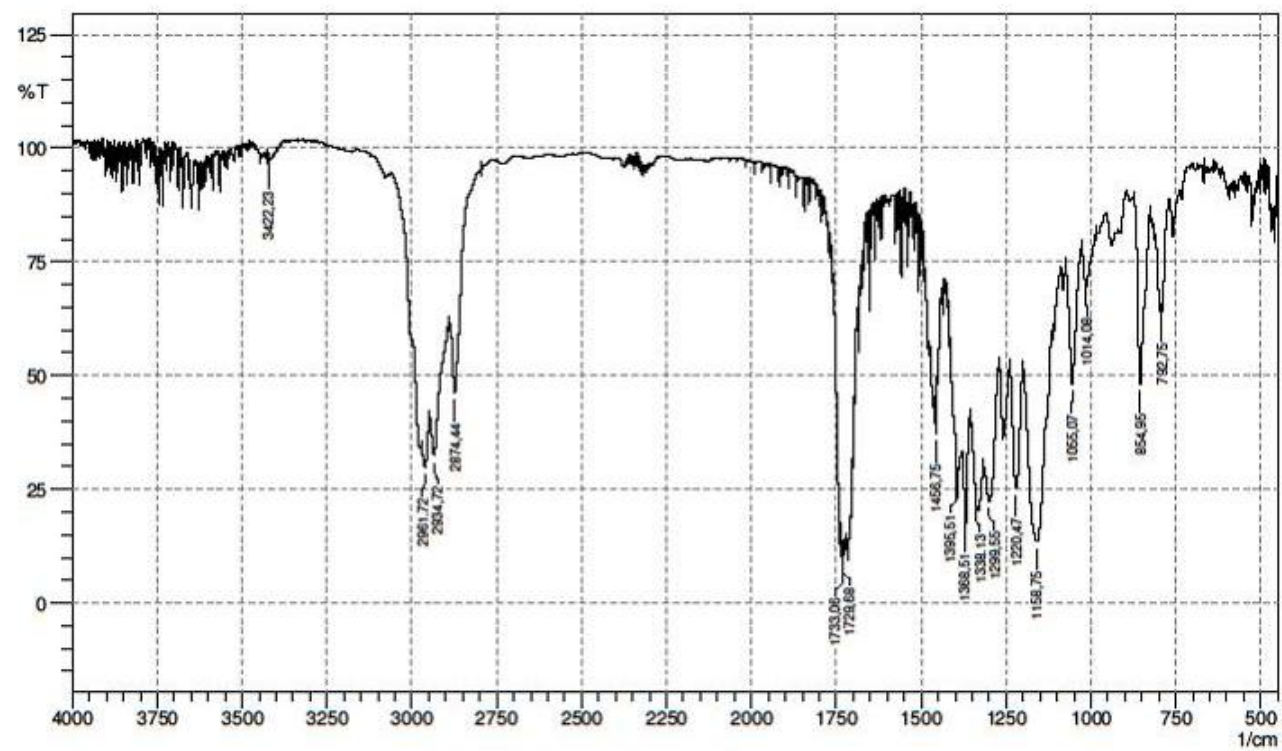

X1020F1

(1-*tert*-Butyloxycarbonylaziridine-2-yl)-*n*-butyl-methanone 7b

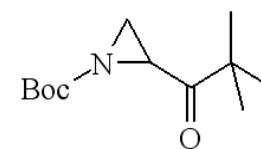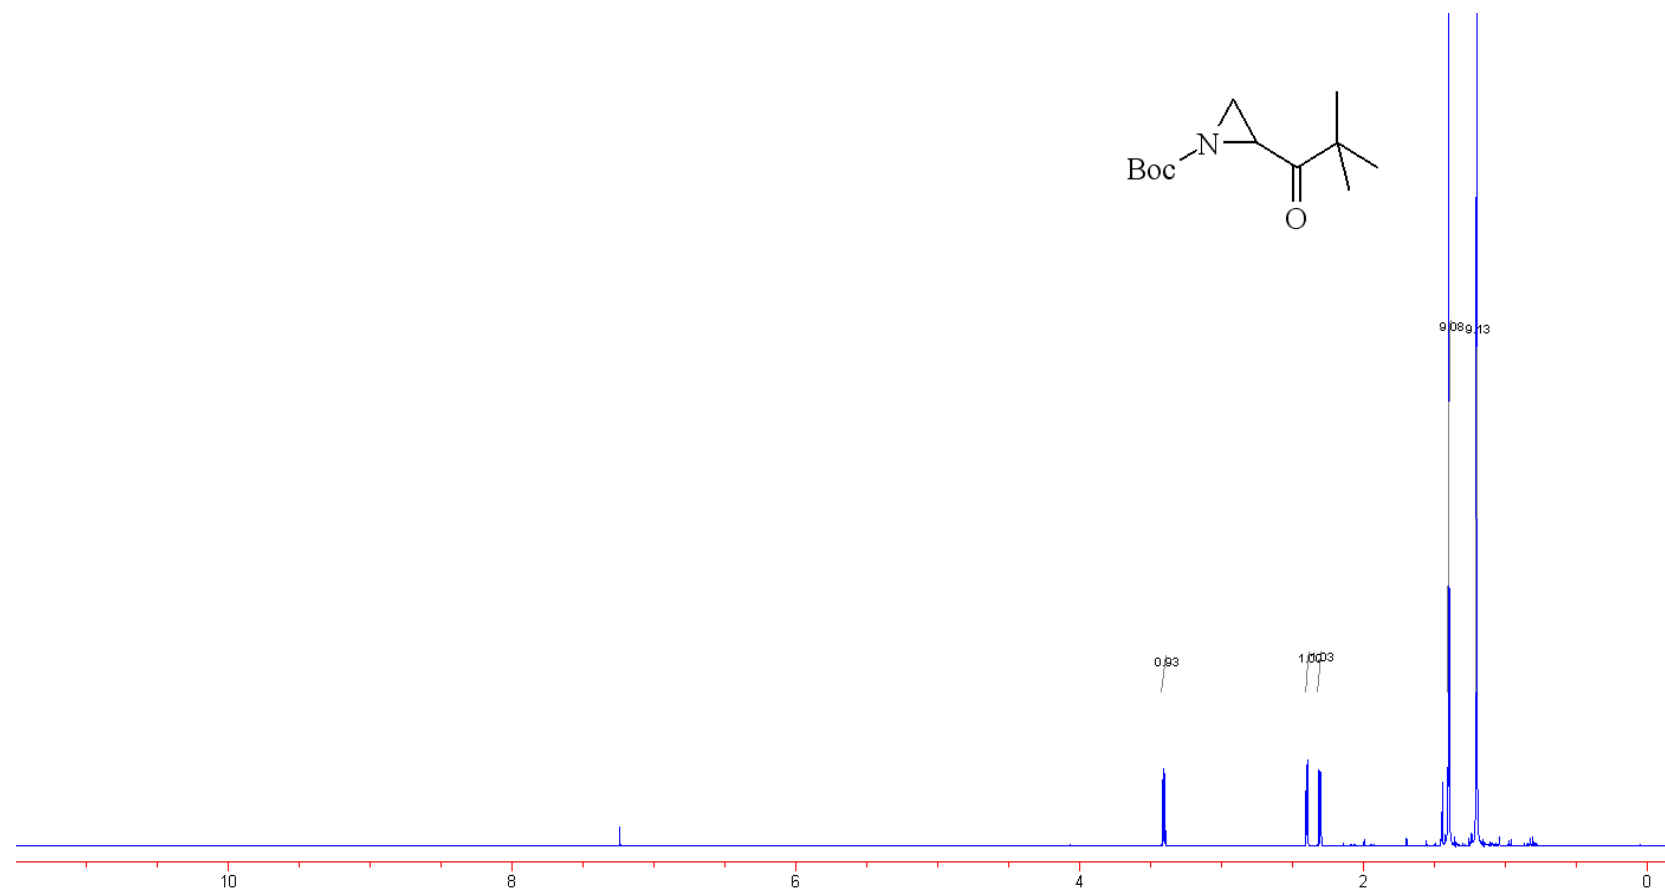

**(1-*tert*-Butyloxycarbonylaziridine-2-yl)-*t*-butyl-methanone 7c**

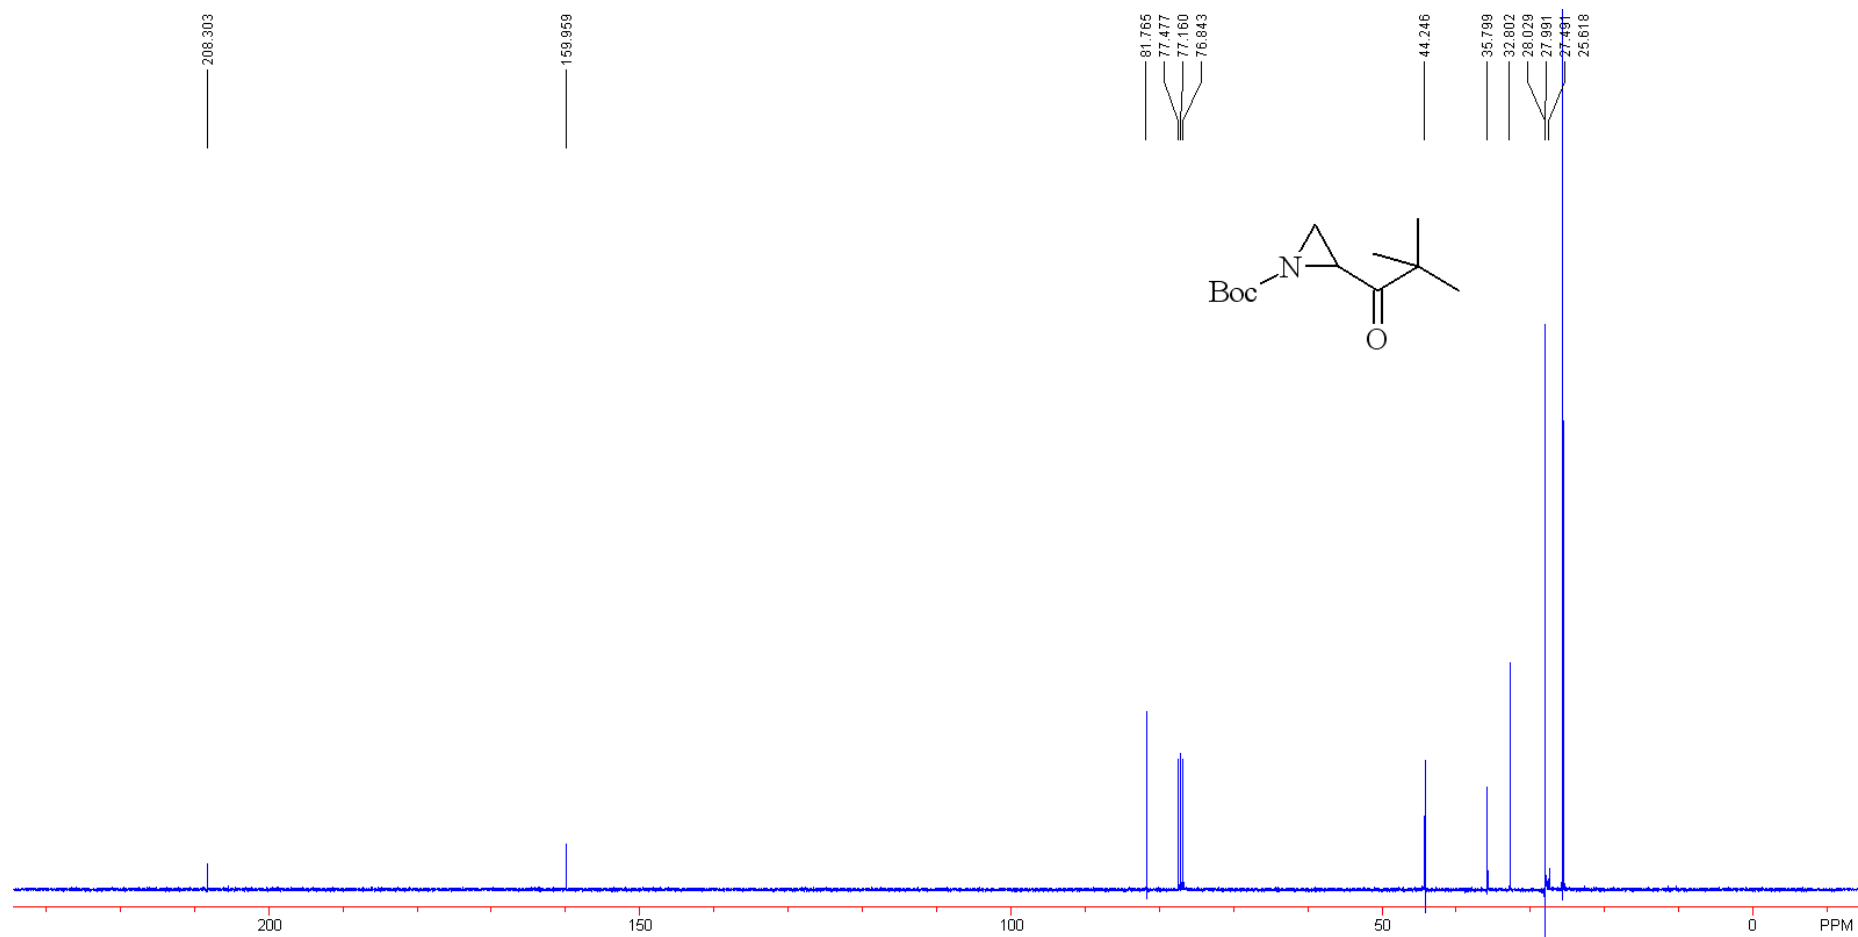

(1-*tert*-Butyloxycarbonylaziridine-2-yl)-*t*-butyl-methanone 7c

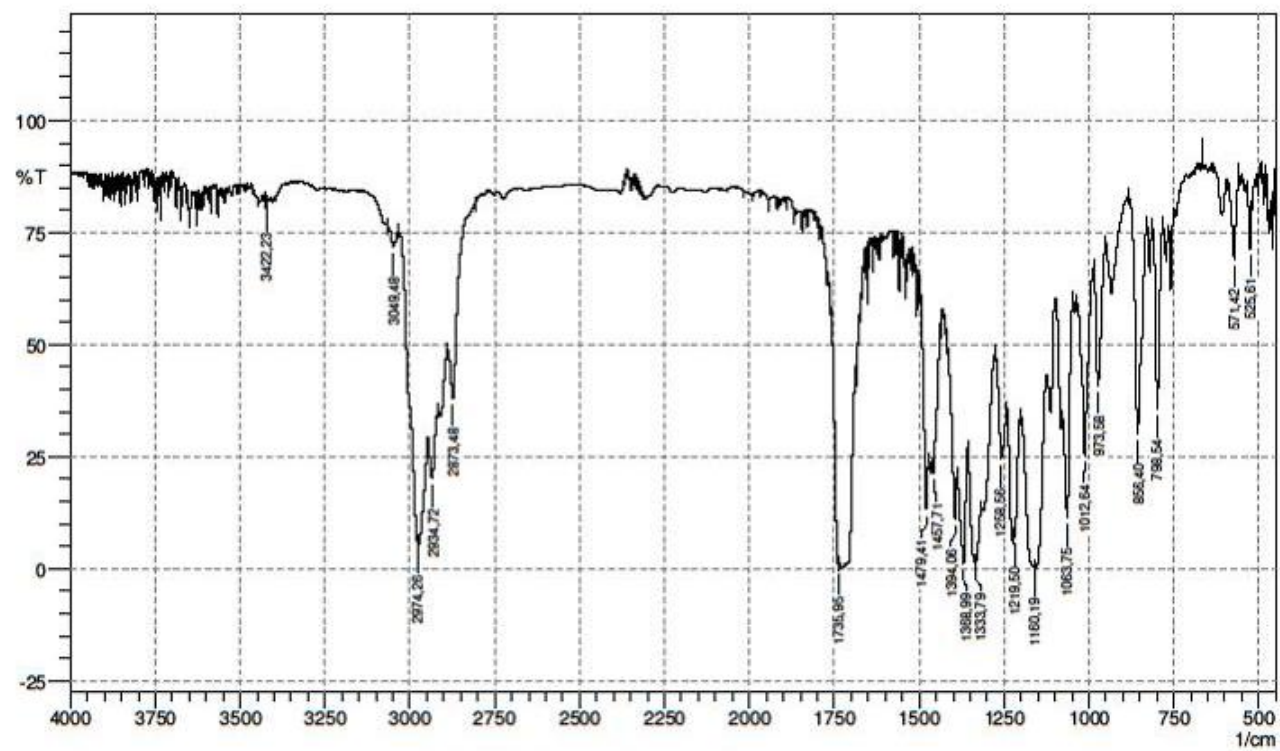

X1016F18

(1-*tert*-Butyloxycarbonylaziridine-2-yl)-*t*-butyl-methanone 7c



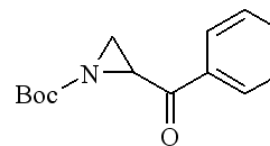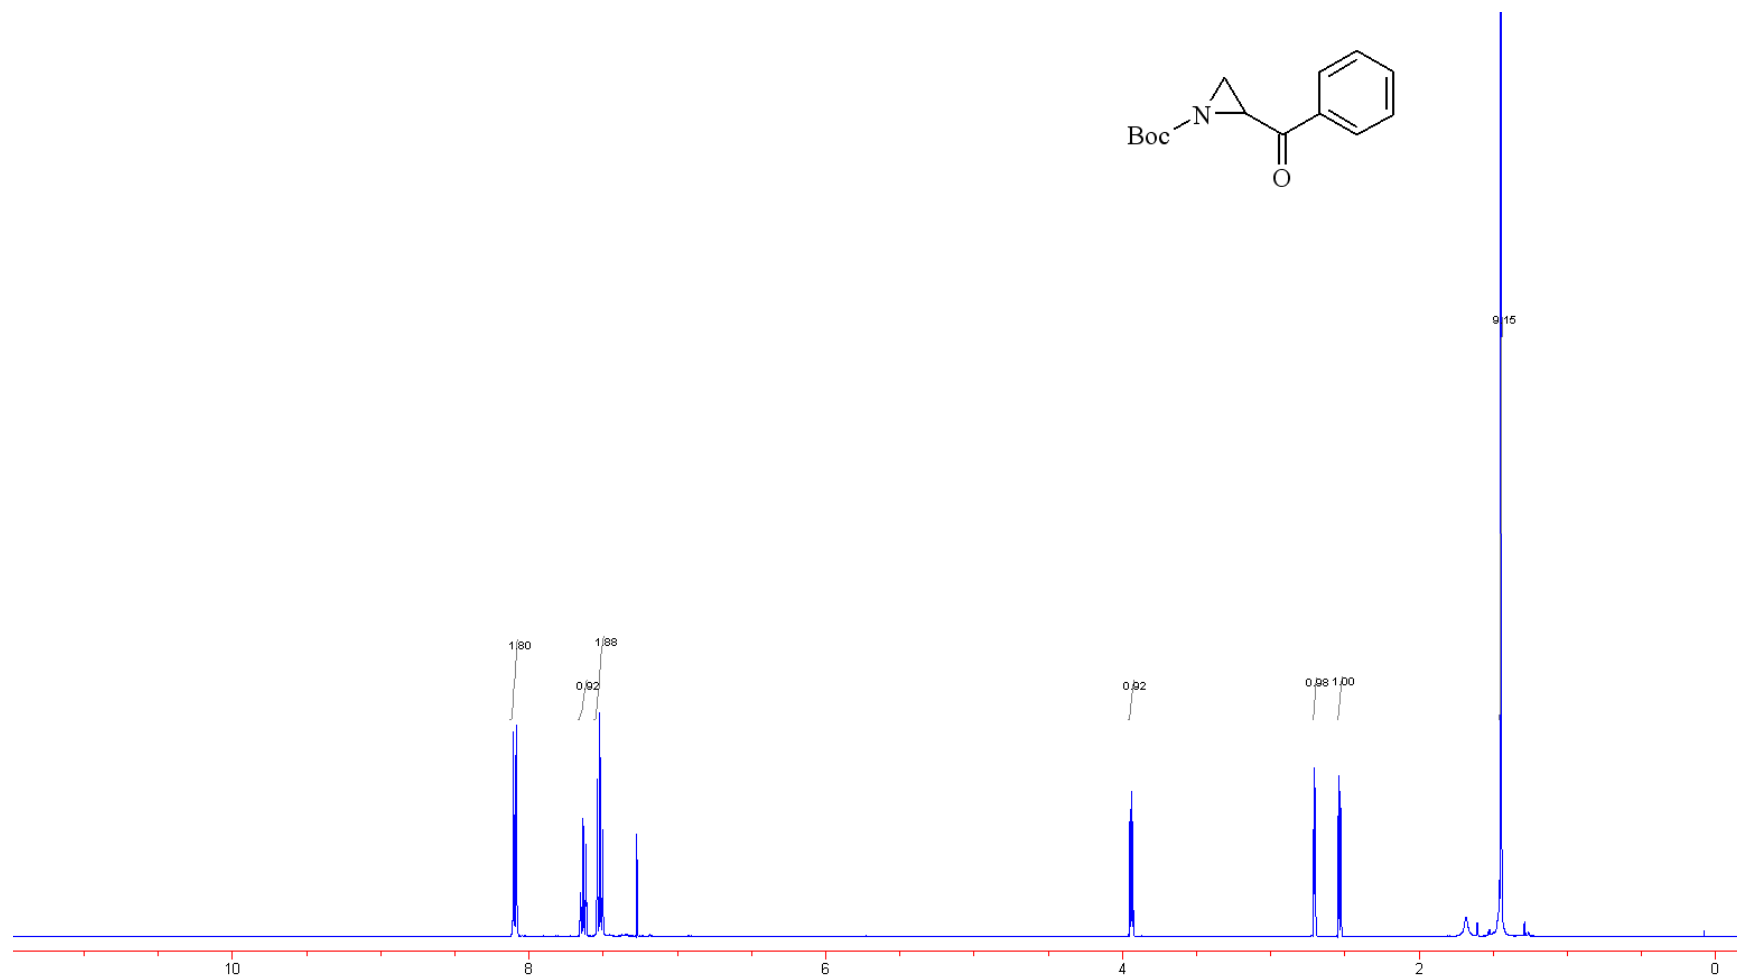

**(1-*tert*-Butyloxycarbonylaziridine-2-yl)-phenyl-methanone 7d**

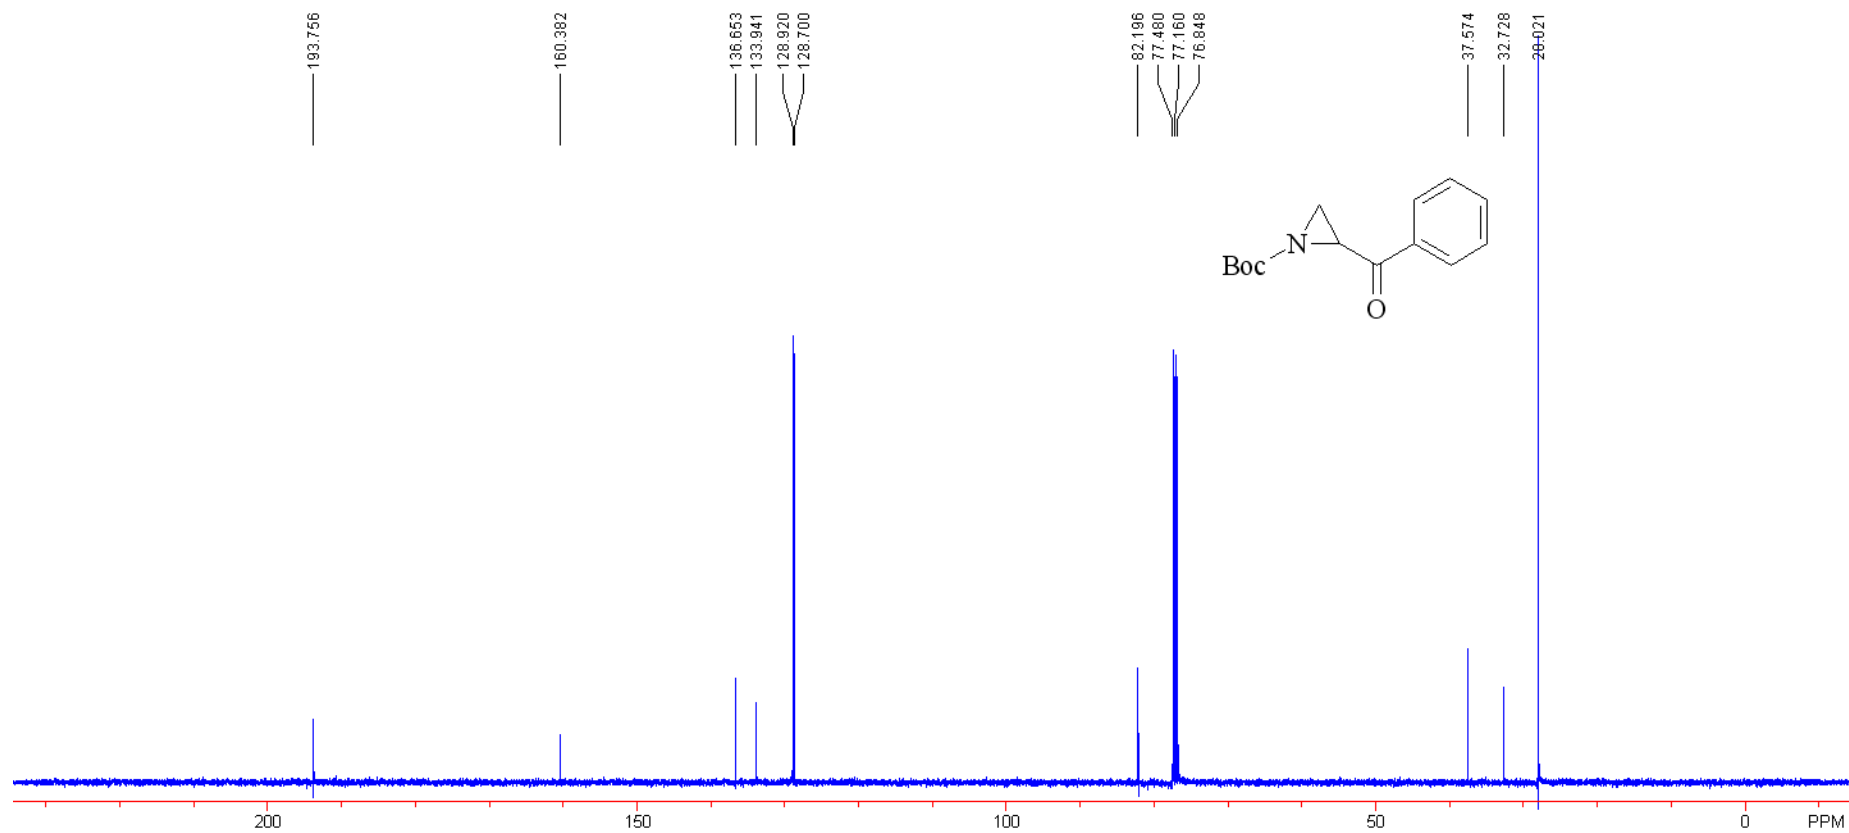

(1-*tert*-Butyloxycarbonylaziridine-2-yl)-phenyl-methanone 7d

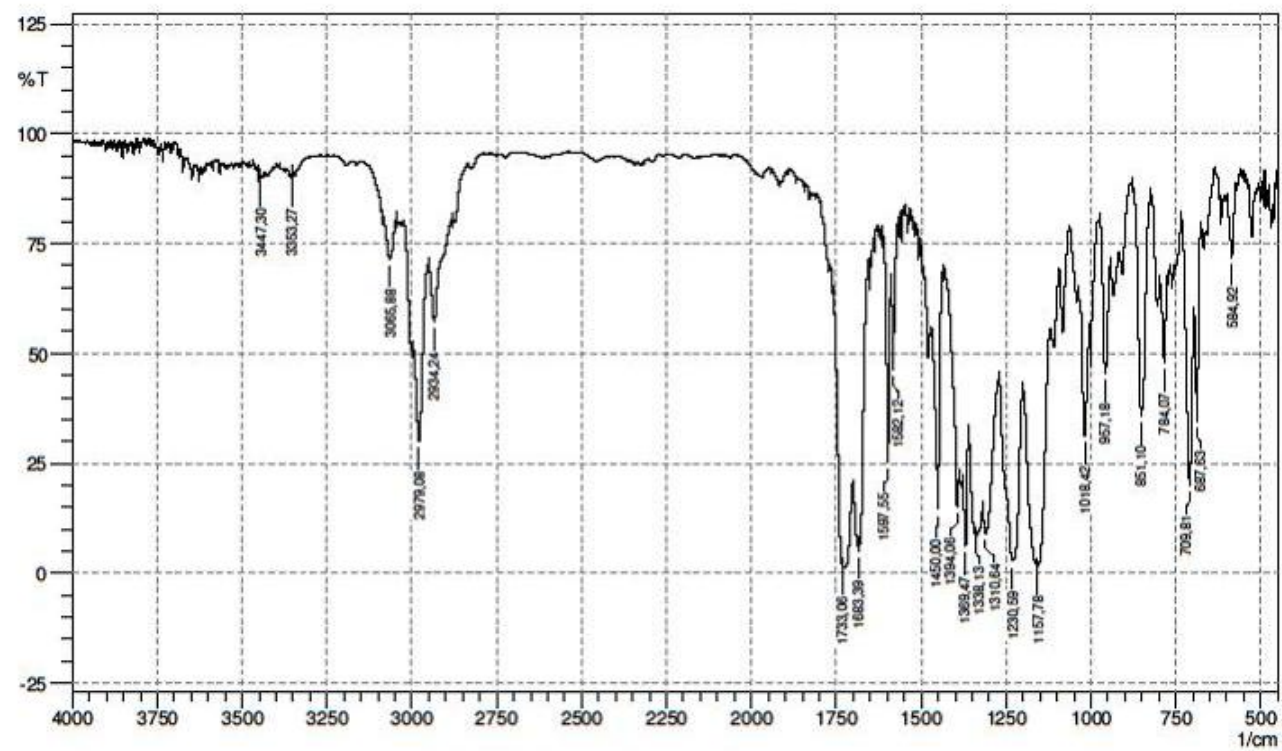

K110

(1-*tert*-Butyloxycarbonylaziridine-2-yl)-phenyl-methanone 7d

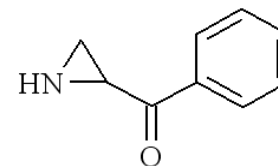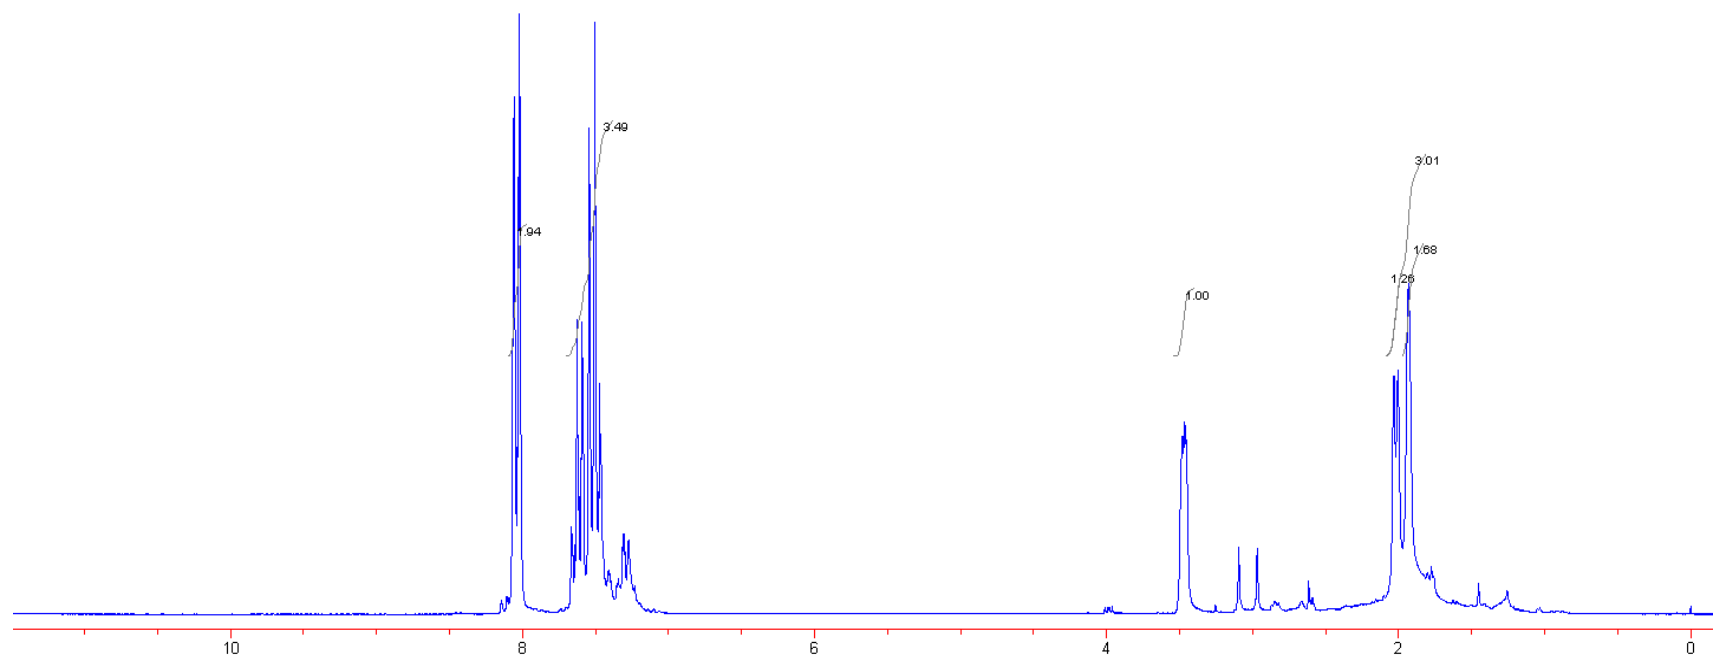

Aziridine-2-yl-phenyl-methanone 8

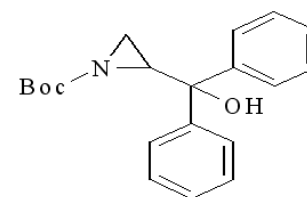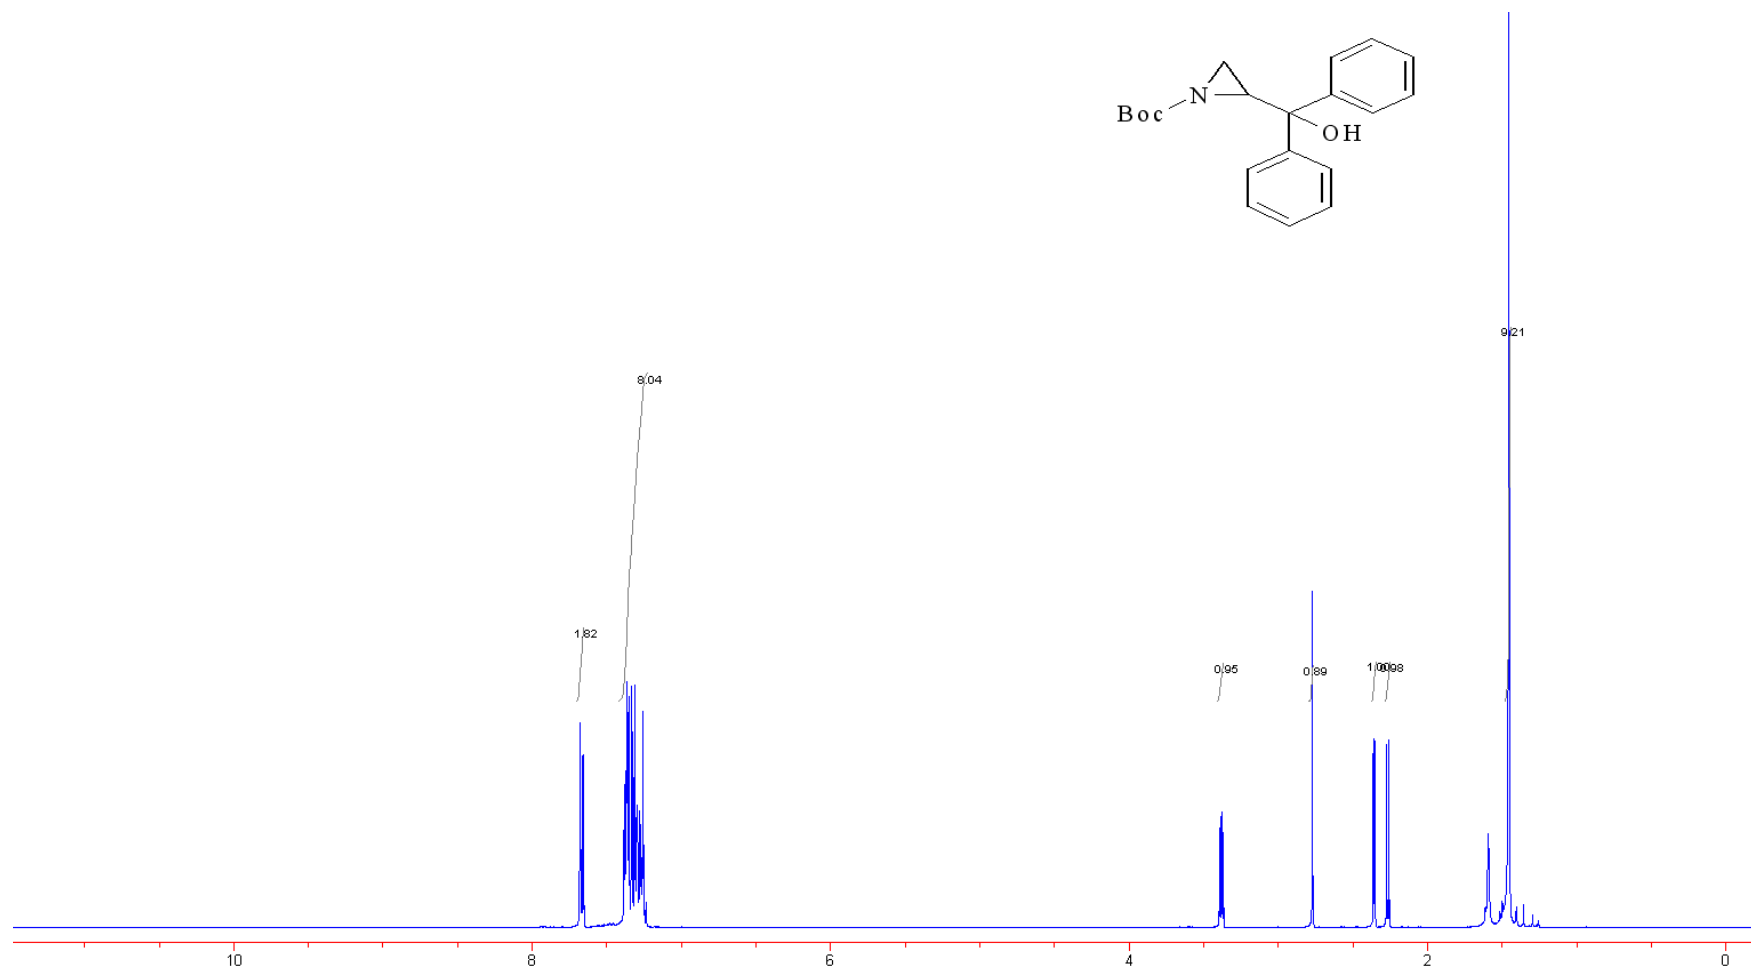

Diphenyl (1-*tert*-butyloxycarbonylaziridine-2-yl)-methanol 9

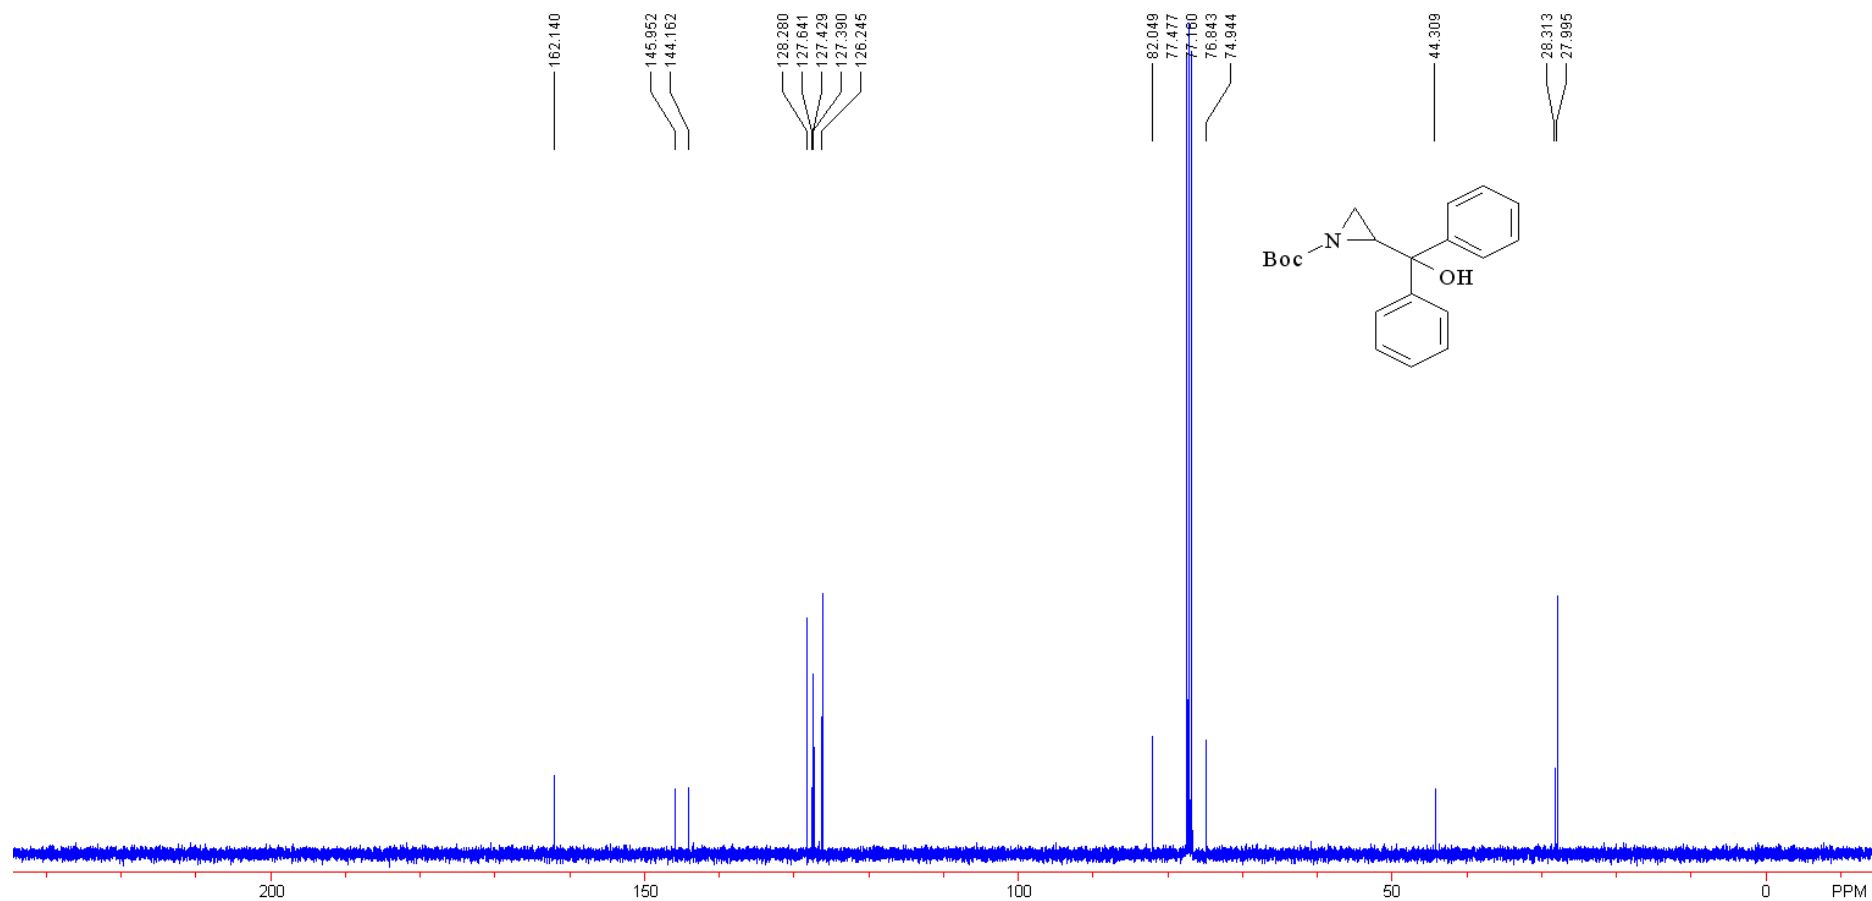

Diphenyl (1-*tert*-butyloxycarbonylaziridine-2-yl)-methanol 9

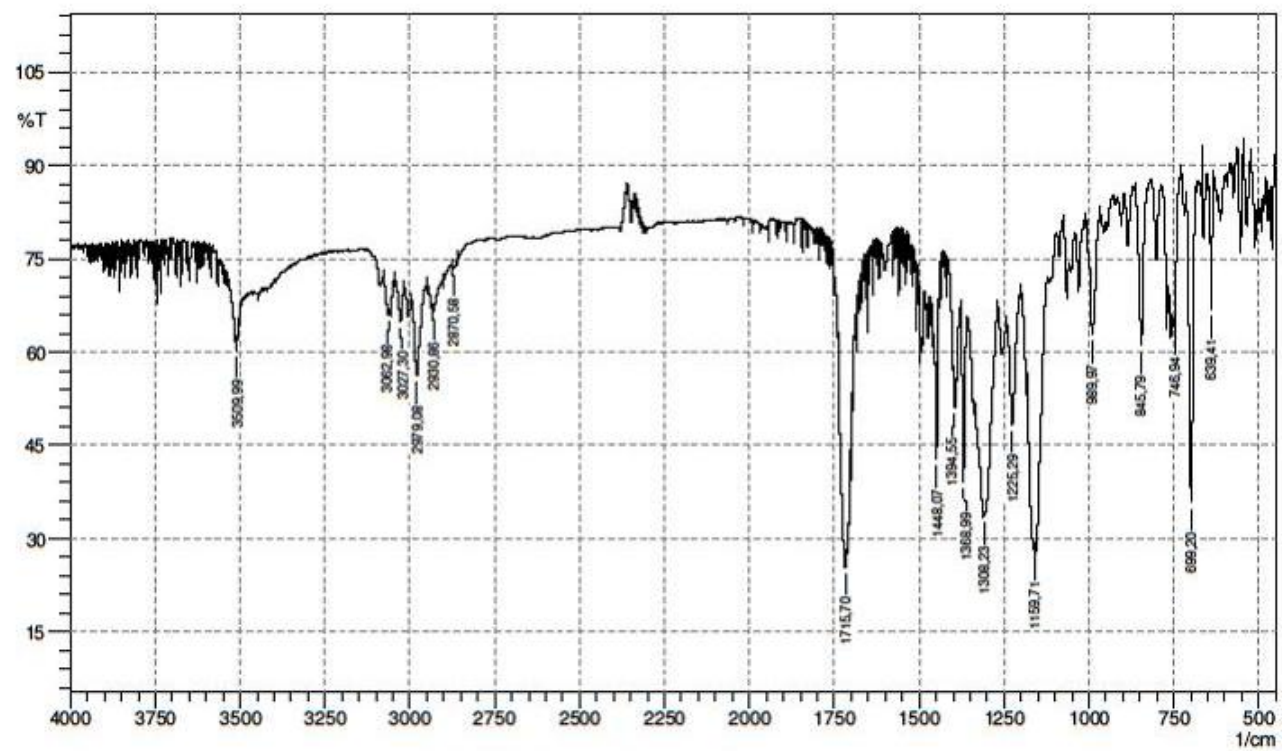

X1022A2

Diphenyl (1-*tert*-butyloxycarbonylaziridine-2-yl)-methanol 9

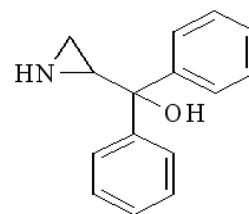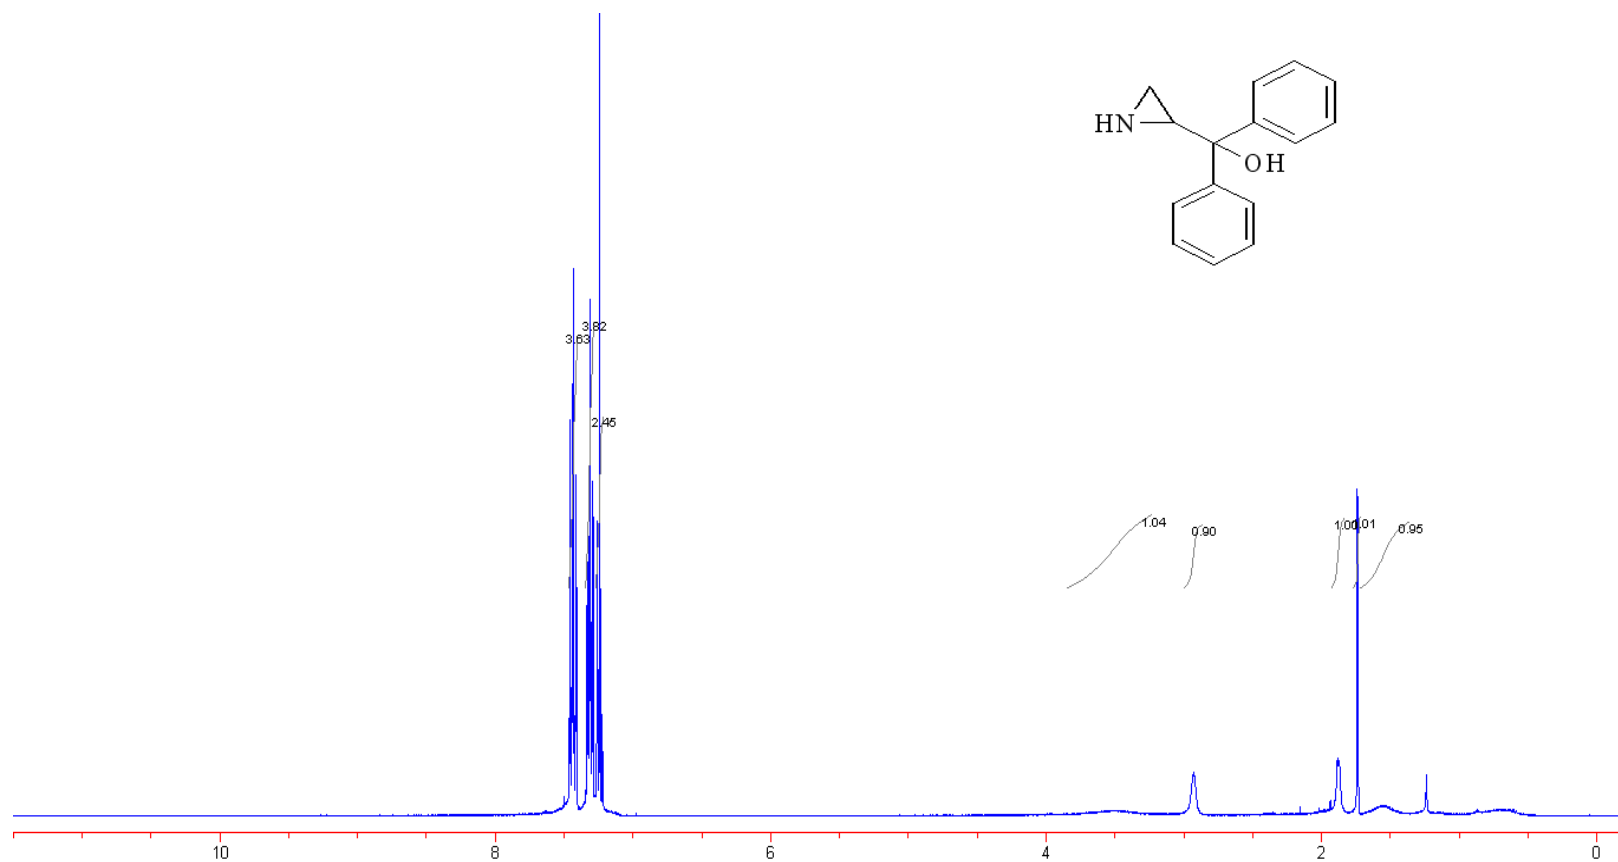

**Aziridine-2-yl-diphenyl-methanol 10**



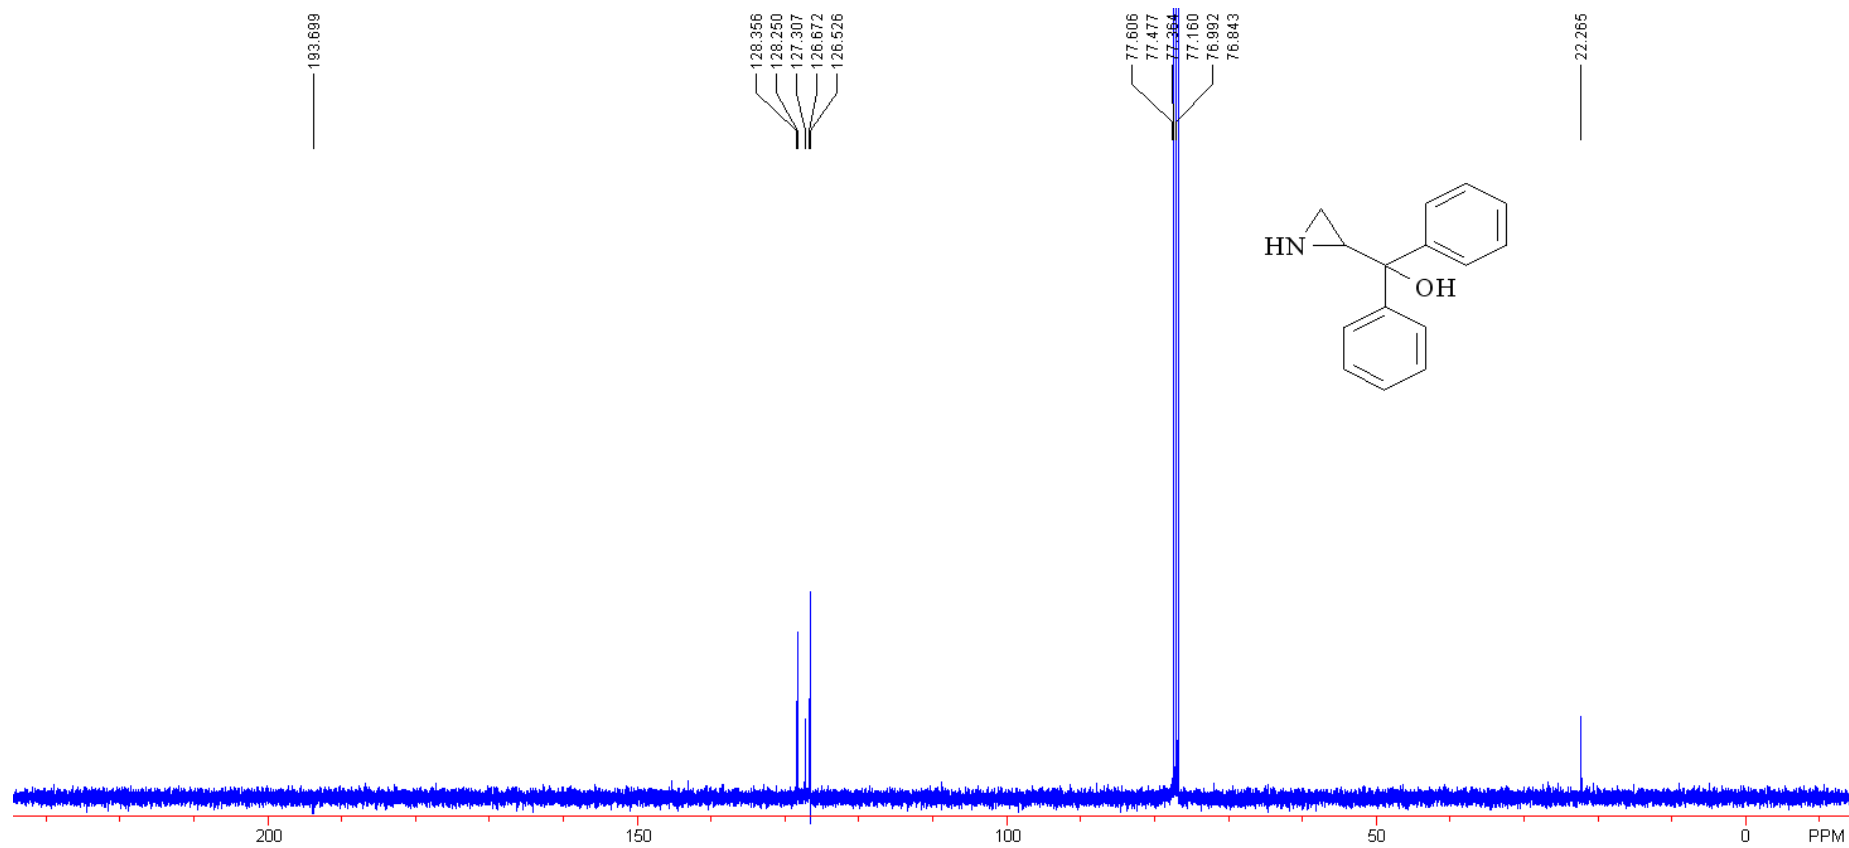

**Aziridine-2-yl-diphenyl-methanol 10**

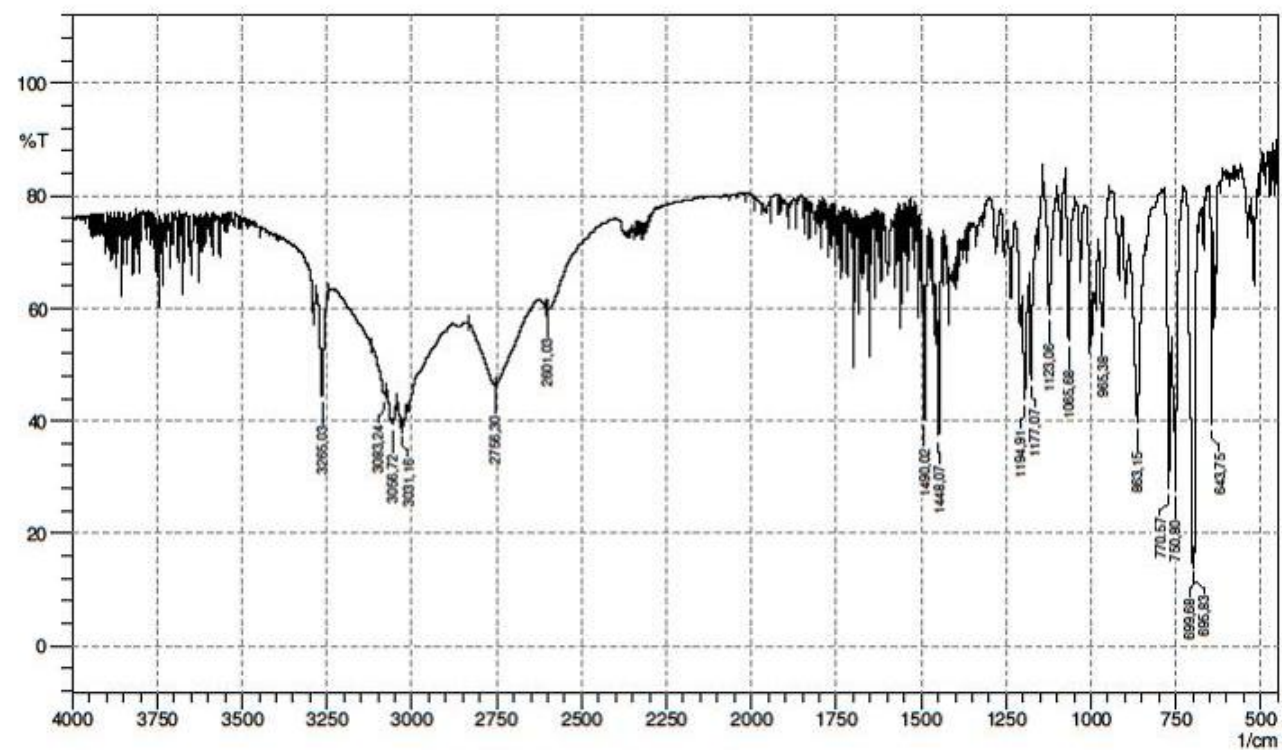

KK111HB

Aziridine-2-yl-diphenyl-methanol 10

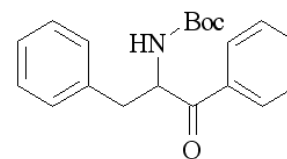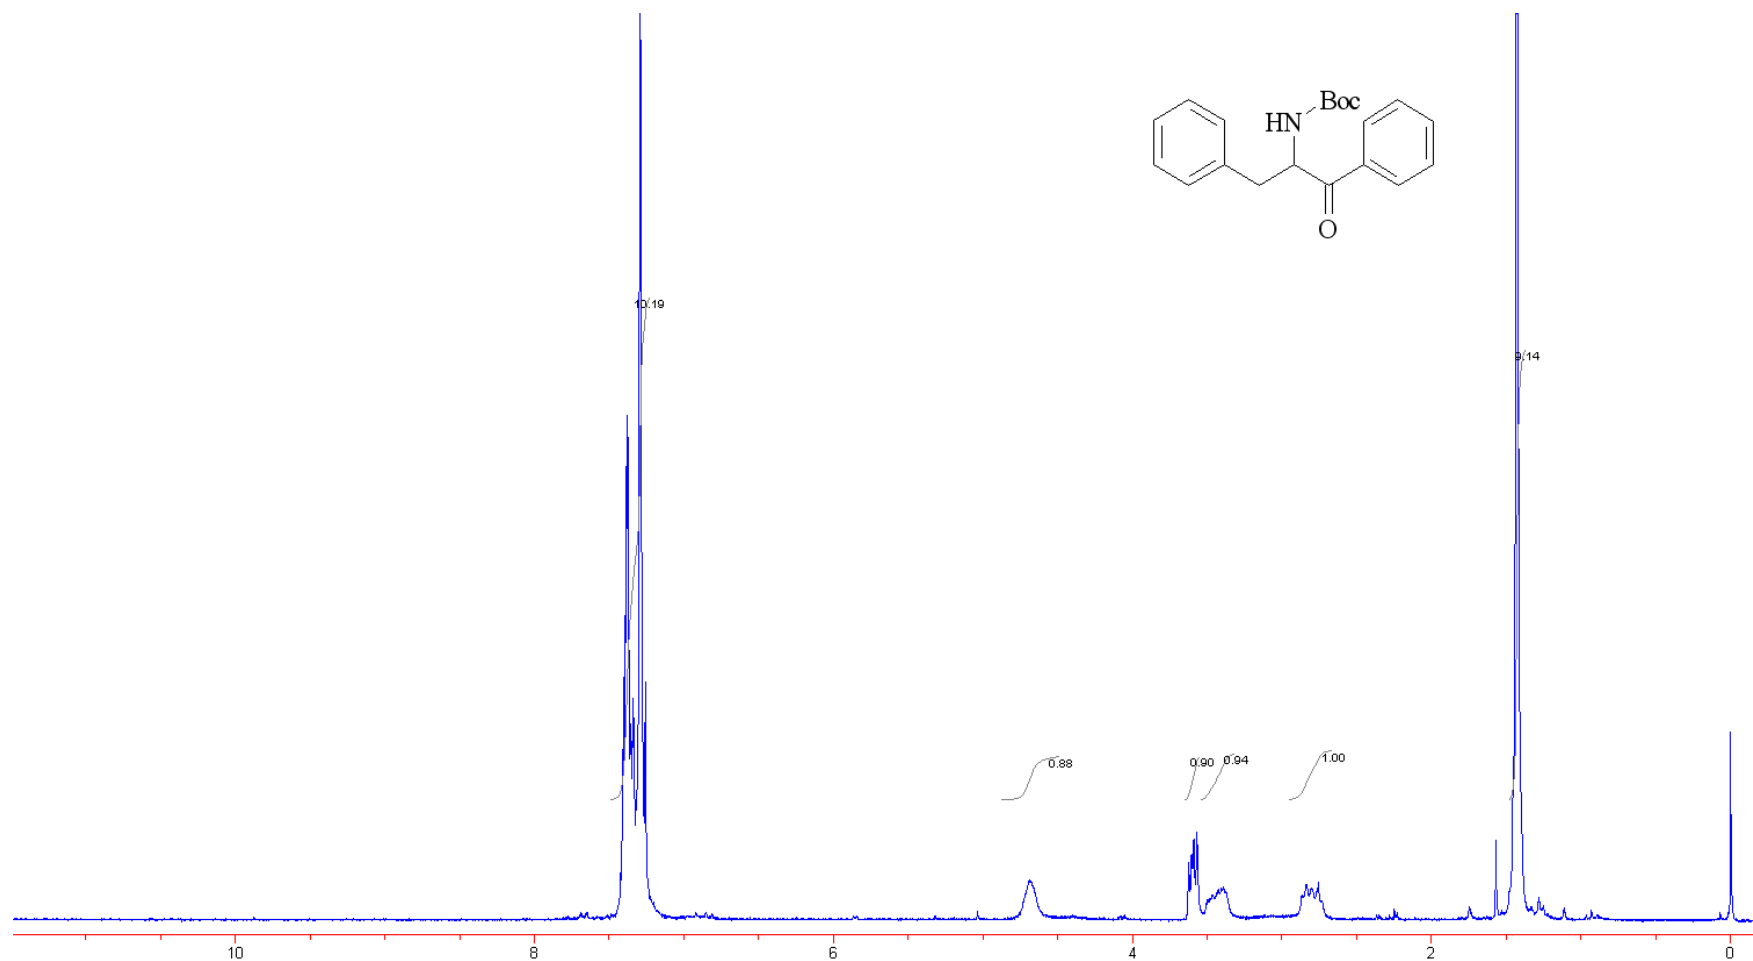

**(1-Benzyl-2-oxo-2-phenyl-ethyl) carbaminic acid terc-butyl ester 11**

## Crystal data for compound 6c

### *Crystal data*

C<sub>30</sub>H<sub>37</sub>NO

$M_r =$ 427.61

Monoclinic, C2/c

$a =$ 25.1187 (8) Å

$b =$ 8.7502 (3) Å

$c =$ 23.5529 (8) Å

$\beta =$ 105.5283 (15)°

$V =$ 4987.8 (3) Å<sup>3</sup>

$F(000) =$ 1856

$D_x =$ 1.139 Mg m<sup>-3</sup>

Mo K $\alpha$  radiation,  $\lambda =$ 0.71073 Å

$Z =$ 8

Cell parameters from 2983 reflections

$\theta =$ 0.9–27.5°

$\mu =$ 0.07 mm<sup>-1</sup>

$T =$ 183 K

Needle, colourless

0.41 × 0.12 × 0.07 mm

### Data collection

|                                                 |                                               |
|-------------------------------------------------|-----------------------------------------------|
| <u>Bruker-Nonius KappaCCD diffractometer</u>    | <u>3227</u> reflections with $I > 2\sigma(I)$ |
| Radiation source: <u>fine-focus sealed tube</u> | $R_{\text{int}} = \underline{0.068}$          |
| <u>Graphite</u> monochromator                   | $2\theta_{\text{max}} = 56^\circ$ ,           |
| $\varphi$ and $\omega$ scan                     | $h = \underline{-32 \quad 32}$                |
| <u>5848</u> independent reflections             | $k = \underline{-11 \quad 10}$                |
| <u>9910</u> measured reflections                | $l = \underline{-31 \quad 30}$                |

### Refinement

|                                                                       |                                                                                                                         |
|-----------------------------------------------------------------------|-------------------------------------------------------------------------------------------------------------------------|
| Refinement on $F^2$                                                   | Secondary atom site location: <u>difference Fourier map</u>                                                             |
| Least-squares matrix: <u>full</u>                                     | Hydrogen site location: <u>mixed</u>                                                                                    |
| $R[F^2 > 2\sigma(F^2)] = \underline{0.075}$                           | <u>H atoms treated by a mixture of independent and constrained refinement</u>                                           |
| $wR(F^2) = \underline{0.166}$                                         | <u><math>w = 1/[\sigma^2(F_o^2) + (0.0484P)^2 + 5.9402P]</math></u><br><u>where <math>P = (F_o^2 + 2F_c^2)/3</math></u> |
| $S = \underline{1.01}$                                                | $(\Delta/\sigma)_{\text{max}} \leq \underline{0.001}$                                                                   |
| <u>5848</u> reflections                                               | $\Delta\rho_{\text{max}} = \underline{0.25} \text{ e } \text{\AA}^{-3}$                                                 |
| <u>297</u> parameters                                                 | $\Delta\rho_{\text{min}} = \underline{-0.23} \text{ e } \text{\AA}^{-3}$                                                |
| <u>0</u> restraints                                                   | Extinction correction: <u>none</u>                                                                                      |
| Primary atom site location: <u>structure-invariant direct methods</u> |                                                                                                                         |

Refinement of  $F^2$  against ALL reflections. The weighted R-factor  $wR$  and goodness of fit  $S$  are based on  $F^2$ , conventional R-factors  $R$  are based on  $F$ , with  $F$  set to zero for negative  $F^2$ . The threshold expression of  $F^2 > 2\sigma(F^2)$  is used only for calculating R-factors(gt) etc. and is not relevant to the choice of reflections for refinement. R-factors based on  $F^2$  are statistically about twice as large as those based on  $F$ , and R-factors based on ALL data will be even larger.

Fractional atomic coordinates and isotropic or equivalent isotropic displacement parameters ( $\text{\AA}^2$ )

|     | $x$          | $y$           | $z$           | $U_{\text{iso}}^*/U_{\text{eq}}$ |
|-----|--------------|---------------|---------------|----------------------------------|
| O24 | 0.73475 (8)  | −0.19275 (19) | 0.04706 (7)   | 0.0297 (4)                       |
| H24 | 0.7653 (12)  | −0.201 (3)    | 0.0415 (12)   | 0.038 (8)*                       |
| N1  | 0.83566 (8)  | −0.0479 (2)   | 0.08281 (8)   | 0.0250 (5)                       |
| C17 | 0.92779 (10) | −0.1677 (3)   | 0.12339 (10)  | 0.0243 (5)                       |
| C4  | 0.89599 (9)  | −0.0149 (2)   | 0.11110 (10)  | 0.0234 (5)                       |
| C22 | 0.91048 (10) | −0.2915 (3)   | 0.08549 (11)  | 0.0276 (6)                       |
| H22 | 0.8762       | −0.2863       | 0.0553        | 0.033*                           |
| C5  | 0.90302 (10) | 0.0850 (3)    | 0.16613 (10)  | 0.0273 (6)                       |
| C2  | 0.79079 (10) | −0.0057 (3)   | 0.11037 (11)  | 0.0264 (6)                       |
| H2  | 0.8034 (10)  | 0.046 (3)     | 0.1483 (11)   | 0.031 (7)*                       |
| C23 | 0.74100 (10) | −0.1122 (3)   | 0.10118 (10)  | 0.0247 (5)                       |
| C16 | 0.89453 (10) | 0.0328 (3)    | 0.00377 (11)  | 0.0295 (6)                       |
| H16 | 0.8613       | −0.0268       | −0.0080       | 0.035*                           |
| C18 | 0.97778 (11) | −0.1804 (3)   | 0.16610 (11)  | 0.0315 (6)                       |
| H18 | 0.9928       | −0.0936       | 0.1941        | 0.038*                           |
| C11 | 0.91919 (10) | 0.0595 (2)    | 0.06333 (10)  | 0.0247 (5)                       |
| C12 | 0.96818 (10) | 0.1430 (3)    | 0.07860 (12)  | 0.0316 (6)                       |
| H12 | 0.9898       | 0.1527        | 0.1216        | 0.038*                           |
| C3  | 0.80065 (10) | 0.0848 (3)    | 0.06083 (11)  | 0.0324 (6)                       |
| H3A | 0.8153       | 0.1860        | 0.0729        | 0.039*                           |
| H3B | 0.7760       | 0.0812        | 0.0189        | 0.039*                           |
| C15 | 0.91721 (12) | 0.0912 (3)    | −0.03920 (12) | 0.0372 (7)                       |
| H15 | 0.8996       | 0.0718        | −0.0800       | 0.045*                           |
| C29 | 0.68688 (10) | −0.0098 (3)   | 0.09175 (10)  | 0.0322 (6)                       |
| C25 | 0.75166 (11) | −0.2379 (3)   | 0.15189 (11)  | 0.0369 (7)                       |
| C10 | 0.90218 (11) | 0.2440 (3)    | 0.16216 (12)  | 0.0358 (6)                       |
| H10 | 0.8999       | 0.2911        | 0.1248        | 0.043*                           |
| C21 | 0.94187 (11) | −0.4229 (3)   | 0.09116 (11)  | 0.0333 (6)                       |

|      |              |             |               |            |
|------|--------------|-------------|---------------|------------|
| H21  | 0.9292       | −0.5062     | 0.0644        | 0.040*     |
| C20  | 0.99056 (12) | −0.4350 (3) | 0.13479 (12)  | 0.0389 (7) |
| H20  | 1.0140       | −0.5224     | 0.1389        | 0.047*     |
| C6   | 0.90550 (10) | 0.0208 (3)  | 0.22081 (11)  | 0.0346 (6) |
| H6   | 0.9021       | −0.0943     | 0.2238        | 0.041*     |
| C31  | 0.67607 (11) | 0.0803 (3)  | 0.03315 (12)  | 0.0398 (7) |
| H31A | 0.7028       | 0.1727      | 0.0405        | 0.048*     |
| H31B | 0.6830       | 0.0114      | 0.0013        | 0.048*     |
| H31C | 0.6403       | 0.1287      | 0.0223        | 0.048*     |
| C13  | 0.99038 (12) | 0.2021 (3)  | 0.03501 (14)  | 0.0402 (7) |
| H13  | 1.0239       | 0.2608      | 0.0465        | 0.048*     |
| C14  | 0.96521 (12) | 0.1774 (3)  | −0.02363 (13) | 0.0415 (7) |
| H14  | 0.9804       | 0.2110      | −0.0574       | 0.050*     |
| C19  | 1.00870 (12) | −0.3134 (3) | 0.17223 (12)  | 0.0392 (7) |
| H19  | 1.0441       | −0.3125     | 0.2049        | 0.047*     |
| C7   | 0.90755 (11) | 0.1127 (4)  | 0.26972 (12)  | 0.0457 (8) |
| H7   | 0.9086       | 0.0659      | 0.3069        | 0.055*     |
| C26  | 0.80872 (12) | −0.3097 (3) | 0.15813 (14)  | 0.0485 (8) |
| H26A | 0.8155       | −0.3860     | 0.1885        | 0.058*     |
| H26B | 0.8369       | −0.2326     | 0.1681        | 0.058*     |
| H26C | 0.8092       | −0.3564     | 0.1214        | 0.058*     |
| C30  | 0.69077 (13) | 0.1118 (4)  | 0.13973 (13)  | 0.0522 (8) |
| H30A | 0.6570       | 0.1692      | 0.1313        | 0.063*     |
| H30B | 0.7210       | 0.1795      | 0.1404        | 0.063*     |
| H30C | 0.6967       | 0.0629      | 0.1774        | 0.063*     |
| C9   | 0.90472 (12) | 0.3345 (3)  | 0.21115 (14)  | 0.0493 (8) |
| H9   | 0.9046       | 0.4439      | 0.2078        | 0.059*     |
| C32  | 0.63417 (11) | −0.1044 (3) | 0.08664 (13)  | 0.0447 (7) |
| H32A | 0.6031       | −0.0367     | 0.0808        | 0.054*     |

|      |              |             |              |             |
|------|--------------|-------------|--------------|-------------|
| H32B | 0.6379       | −0.1617     | 0.1223       | 0.054*      |
| H32C | 0.6286       | −0.1734     | 0.0539       | 0.054*      |
| C8   | 0.90746 (12) | 0.2702 (4)  | 0.26461 (15) | 0.0531 (9)  |
| H8   | 0.9090       | 0.3344      | 0.2981       | 0.064*      |
| C27  | 0.71139 (13) | −0.3732 (3) | 0.13751 (15) | 0.0559 (9)  |
| H27A | 0.7197       | −0.4443     | 0.1697       | 0.073*      |
| H27B | 0.7150       | −0.4233     | 0.1025       | 0.073*      |
| H27C | 0.6742       | −0.3367     | 0.1313       | 0.073*      |
| C28  | 0.75147 (15) | −0.1735 (4) | 0.21238 (12) | 0.0631 (10) |
| H28A | 0.7579       | −0.2547     | 0.2408       | 0.082*      |
| H28B | 0.7163       | −0.1272     | 0.2100       | 0.082*      |
| H28C | 0.7801       | −0.0981     | 0.2242       | 0.082*      |

Atomic displacement parameters (Å<sup>2</sup>)

|     | $U^{11}$    | $U^{22}$    | $U^{33}$    | $U^{12}$     | $U^{13}$    | $U^{23}$     |
|-----|-------------|-------------|-------------|--------------|-------------|--------------|
| O24 | 0.0242 (10) | 0.0379 (10) | 0.0297 (10) | −0.0031 (8)  | 0.0121 (8)  | −0.0100 (8)  |
| N1  | 0.0210 (11) | 0.0291 (11) | 0.0255 (11) | −0.0010 (9)  | 0.0071 (9)  | 0.0013 (9)   |
| C17 | 0.0248 (14) | 0.0241 (12) | 0.0252 (12) | −0.0010 (10) | 0.0090 (11) | 0.0033 (10)  |
| C4  | 0.0192 (13) | 0.0245 (12) | 0.0263 (12) | −0.0008 (10) | 0.0056 (10) | −0.0018 (10) |
| C22 | 0.0277 (14) | 0.0265 (13) | 0.0284 (13) | −0.0027 (11) | 0.0073 (11) | 0.0029 (11)  |
| C5  | 0.0189 (13) | 0.0328 (14) | 0.0305 (14) | −0.0005 (11) | 0.0069 (11) | −0.0042 (11) |
| C2  | 0.0220 (14) | 0.0308 (13) | 0.0273 (13) | 0.0005 (11)  | 0.0086 (11) | −0.0001 (11) |
| C23 | 0.0221 (13) | 0.0325 (13) | 0.0211 (12) | −0.0022 (10) | 0.0086 (11) | −0.0060 (10) |
| C16 | 0.0266 (14) | 0.0293 (13) | 0.0344 (14) | 0.0032 (11)  | 0.0115 (12) | 0.0019 (11)  |
| C18 | 0.0306 (15) | 0.0293 (13) | 0.0304 (14) | 0.0009 (12)  | 0.0010 (12) | −0.0026 (11) |
| C11 | 0.0231 (13) | 0.0191 (11) | 0.0351 (14) | 0.0032 (10)  | 0.0131 (11) | 0.0013 (10)  |
| C12 | 0.0244 (14) | 0.0265 (13) | 0.0466 (16) | 0.0013 (11)  | 0.0140 (13) | −0.0003 (12) |
| C3  | 0.0252 (14) | 0.0349 (14) | 0.0376 (15) | 0.0048 (11)  | 0.0094 (12) | 0.0104 (12)  |
| C15 | 0.0438 (18) | 0.0377 (15) | 0.0353 (15) | 0.0112 (13)  | 0.0196 (13) | 0.0077 (12)  |



|     |             |             |             |              |             |              |
|-----|-------------|-------------|-------------|--------------|-------------|--------------|
| C29 | 0.0250 (14) | 0.0436 (15) | 0.0287 (14) | 0.0003 (12)  | 0.0083 (11) | −0.0091 (12) |
| C25 | 0.0327 (16) | 0.0451 (16) | 0.0349 (15) | −0.0043 (13) | 0.0124 (13) | 0.0085 (13)  |
| C10 | 0.0318 (16) | 0.0342 (14) | 0.0442 (16) | 0.0004 (12)  | 0.0150 (13) | −0.0085 (13) |
| C21 | 0.0368 (17) | 0.0245 (13) | 0.0384 (15) | −0.0019 (12) | 0.0098 (13) | 0.0002 (11)  |
| C20 | 0.0403 (17) | 0.0289 (14) | 0.0481 (17) | 0.0099 (13)  | 0.0130 (14) | 0.0072 (13)  |
| C6  | 0.0241 (15) | 0.0455 (16) | 0.0326 (15) | −0.0045 (12) | 0.0052 (12) | −0.0057 (13) |
| C31 | 0.0293 (16) | 0.0463 (16) | 0.0430 (16) | 0.0105 (13)  | 0.0083 (13) | 0.0027 (13)  |
| C13 | 0.0342 (16) | 0.0282 (14) | 0.067 (2)   | −0.0048 (12) | 0.0283 (16) | −0.0011 (14) |
| C14 | 0.0480 (19) | 0.0322 (15) | 0.0566 (19) | 0.0093 (14)  | 0.0350 (16) | 0.0117 (14)  |
| C19 | 0.0351 (16) | 0.0413 (16) | 0.0362 (15) | 0.0072 (13)  | 0.0008 (13) | 0.0050 (13)  |
| C7  | 0.0310 (17) | 0.076 (2)   | 0.0293 (15) | −0.0026 (15) | 0.0062 (13) | −0.0101 (15) |
| C26 | 0.0439 (19) | 0.0445 (17) | 0.0573 (19) | 0.0025 (14)  | 0.0142 (15) | 0.0240 (15)  |
| C30 | 0.0447 (19) | 0.064 (2)   | 0.0468 (18) | 0.0129 (16)  | 0.0106 (15) | −0.0180 (15) |
| C9  | 0.0428 (19) | 0.0450 (17) | 0.065 (2)   | −0.0055 (14) | 0.0237 (17) | −0.0229 (16) |
| C32 | 0.0279 (16) | 0.0624 (19) | 0.0472 (18) | −0.0034 (14) | 0.0160 (14) | −0.0041 (15) |
| C8  | 0.0370 (18) | 0.069 (2)   | 0.056 (2)   | −0.0075 (16) | 0.0175 (16) | −0.0362 (18) |
| C27 | 0.0405 (19) | 0.0486 (18) | 0.082 (2)   | −0.0063 (15) | 0.0211 (18) | 0.0212 (17)  |
| C28 | 0.080 (3)   | 0.080 (2)   | 0.0328 (17) | 0.012 (2)    | 0.0217 (17) | 0.0173 (17)  |

Geometric parameters (Å, °)

|         |           |          |           |
|---------|-----------|----------|-----------|
| O24—C23 | 1.428 (3) | C25—C26  | 1.535 (4) |
| O24—H24 | 0.82 (3)  | C10—C9   | 1.387 (4) |
| N1—C3   | 1.465 (3) | C10—H10  | 0.9599    |
| N1—C2   | 1.490 (3) | C21—C20  | 1.375 (4) |
| N1—C4   | 1.511 (3) | C21—H21  | 0.9599    |
| C17—C18 | 1.387 (3) | C20—C19  | 1.380 (4) |
| C17—C22 | 1.397 (3) | C20—H20  | 0.9535    |
| C17—C4  | 1.544 (3) | C6—C7    | 1.394 (4) |
| C4—C5   | 1.534 (3) | C6—H6    | 1.0146    |
| C4—C11  | 1.543 (3) | C31—H31A | 1.0362    |

|             |             |             |           |
|-------------|-------------|-------------|-----------|
| C22—C21     | 1.380 (3)   | C31—H31B    | 1.0131    |
| C22—H22     | 0.9600      | C31—H31C    | 0.9642    |
| C5—C6       | 1.391 (3)   | C13—C14     | 1.373 (4) |
| C5—C10      | 1.394 (3)   | C13—H13     | 0.9601    |
| C2—C3       | 1.485 (3)   | C14—H14     | 1.0143    |
| C2—C23      | 1.528 (3)   | C19—H19     | 1.0087    |
| C2—H2       | 0.98 (2)    | C7—C8       | 1.384 (4) |
| C23—C25     | 1.593 (3)   | C7—H7       | 0.9597    |
| C23—C29     | 1.593 (3)   | C26—H26A    | 0.9599    |
| C16—C15     | 1.385 (3)   | C26—H26B    | 0.9600    |
| C16—C11     | 1.393 (3)   | C26—H26C    | 0.9601    |
| C16—H16     | 0.9598      | C30—H30A    | 0.9600    |
| C18—C19     | 1.384 (3)   | C30—H30B    | 0.9599    |
| C18—H18     | 1.0103      | C30—H30C    | 0.9600    |
| C11—C12     | 1.393 (3)   | C9—C8       | 1.364 (4) |
| C12—C13     | 1.392 (4)   | C9—H9       | 0.9601    |
| C12—H12     | 1.0174      | C32—H32A    | 0.9600    |
| C3—H3A      | 0.9717      | C32—H32B    | 0.9601    |
| C3—H3B      | 1.0158      | C32—H32C    | 0.9599    |
| C15—C14     | 1.386 (4)   | C8—H8       | 0.9602    |
| C15—H15     | 0.9601      | C27—H27A    | 0.9600    |
| C29—C30     | 1.536 (4)   | C27—H27B    | 0.9600    |
| C29—C32     | 1.539 (4)   | C27—H27C    | 0.9600    |
| C29—C31     | 1.549 (4)   | C28—H28A    | 0.9600    |
| C25—C28     | 1.533 (4)   | C28—H28B    | 0.9600    |
| C25—C27     | 1.535 (4)   | C28—H28C    | 0.9600    |
| C23—O24—H24 | 107.8 (19)  | C9—C10—H10  | 119.7     |
| C3—N1—C2    | 60.32 (15)  | C5—C10—H10  | 119.1     |
| C3—N1—C4    | 116.14 (18) | C20—C21—C22 | 120.5 (2) |

|             |             |               |           |
|-------------|-------------|---------------|-----------|
| C2—N1—C4    | 123.15 (18) | C20—C21—H21   | 120.3     |
| C18—C17—C22 | 117.9 (2)   | C22—C21—H21   | 119.2     |
| C18—C17—C4  | 121.9 (2)   | C21—C20—C19   | 119.6 (2) |
| C22—C17—C4  | 119.6 (2)   | C21—C20—H20   | 122.6     |
| N1—C4—C5    | 110.88 (18) | C19—C20—H20   | 117.7     |
| N1—C4—C11   | 106.81 (18) | C5—C6—C7      | 121.0 (3) |
| C5—C4—C11   | 113.27 (18) | C5—C6—H6      | 118.8     |
| N1—C4—C17   | 108.94 (18) | C7—C6—H6      | 120.0     |
| C5—C4—C17   | 113.47 (19) | C29—C31—H31A  | 107.3     |
| C11—C4—C17  | 102.99 (17) | C29—C31—H31B  | 109.5     |
| C21—C22—C17 | 120.8 (2)   | H31A—C31—H31B | 110.8     |
| C21—C22—H22 | 119.2       | C29—C31—H31C  | 112.9     |
| C17—C22—H22 | 120.0       | H31A—C31—H31C | 102.6     |
| C6—C5—C10   | 117.5 (2)   | H31B—C31—H31C | 113.4     |
| C6—C5—C4    | 121.2 (2)   | C14—C13—C12   | 121.0 (3) |
| C10—C5—C4   | 121.1 (2)   | C14—C13—H13   | 120.0     |
| C3—C2—N1    | 59.02 (14)  | C12—C13—H13   | 119.0     |
| C3—C2—C23   | 121.1 (2)   | C13—C14—C15   | 119.0 (2) |
| N1—C2—C23   | 118.2 (2)   | C13—C14—H14   | 125.1     |
| C3—C2—H2    | 112.9 (14)  | C15—C14—H14   | 115.7     |
| N1—C2—H2    | 114.7 (14)  | C20—C19—C18   | 120.1 (3) |
| C23—C2—H2   | 117.8 (14)  | C20—C19—H19   | 124.5     |
| O24—C23—C2  | 108.53 (18) | C18—C19—H19   | 115.4     |
| O24—C23—C25 | 106.53 (19) | C8—C7—C6      | 120.2 (3) |
| C2—C23—C25  | 110.37 (19) | C8—C7—H7      | 120.2     |
| O24—C23—C29 | 105.51 (18) | C6—C7—H7      | 119.6     |
| C2—C23—C29  | 108.20 (19) | C25—C26—H26A  | 109.4     |
| C25—C23—C29 | 117.31 (19) | C25—C26—H26B  | 110.1     |
| C15—C16—C11 | 121.0 (2)   | H26A—C26—H26B | 109.5     |

|             |             |               |           |
|-------------|-------------|---------------|-----------|
| C15—C16—H16 | 119.1       | C25—C26—H26C  | 108.9     |
| C11—C16—H16 | 119.9       | H26A—C26—H26C | 109.5     |
| C19—C18—C17 | 121.1 (2)   | H26B—C26—H26C | 109.5     |
| C19—C18—H18 | 117.6       | C29—C30—H30A  | 109.4     |
| C17—C18—H18 | 121.3       | C29—C30—H30B  | 109.5     |
| C16—C11—C12 | 118.1 (2)   | H30A—C30—H30B | 109.5     |
| C16—C11—C4  | 120.7 (2)   | C29—C30—H30C  | 109.6     |
| C12—C11—C4  | 120.9 (2)   | H30A—C30—H30C | 109.5     |
| C13—C12—C11 | 120.3 (3)   | H30B—C30—H30C | 109.5     |
| C13—C12—H12 | 119.4       | C8—C9—C10     | 120.8 (3) |
| C11—C12—H12 | 120.0       | C8—C9—H9      | 119.0     |
| N1—C3—C2    | 60.66 (15)  | C10—C9—H9     | 120.2     |
| N1—C3—H3A   | 118.3       | C29—C32—H32A  | 109.2     |
| C2—C3—H3A   | 112.7       | C29—C32—H32B  | 109.4     |
| N1—C3—H3B   | 118.1       | H32A—C32—H32B | 109.5     |
| C2—C3—H3B   | 124.1       | C29—C32—H32C  | 109.8     |
| H3A—C3—H3B  | 113.4       | H32A—C32—H32C | 109.5     |
| C16—C15—C14 | 120.4 (3)   | H32B—C32—H32C | 109.5     |
| C16—C15—H15 | 119.8       | C9—C8—C7      | 119.3 (3) |
| C14—C15—H15 | 119.7       | C9—C8—H8      | 119.9     |
| C30—C29—C32 | 108.3 (2)   | C7—C8—H8      | 120.8     |
| C30—C29—C31 | 105.4 (2)   | C25—C27—H27A  | 109.5     |
| C32—C29—C31 | 105.2 (2)   | C25—C27—H27B  | 109.5     |
| C30—C29—C23 | 113.8 (2)   | H27A—C27—H27B | 109.5     |
| C32—C29—C23 | 113.1 (2)   | C25—C27—H27C  | 109.5     |
| C31—C29—C23 | 110.48 (19) | H27A—C27—H27C | 109.5     |
| C28—C25—C27 | 108.8 (2)   | H27B—C27—H27C | 109.5     |
| C28—C25—C26 | 107.2 (2)   | C25—C28—H28A  | 109.5     |
| C27—C25—C26 | 104.4 (2)   | C25—C28—H28B  | 109.5     |

|                 |              |                 |            |
|-----------------|--------------|-----------------|------------|
| C28—C25—C23     | 113.6 (2)    | H28A—C28—H28B   | 109.5      |
| C27—C25—C23     | 113.5 (2)    | C25—C28—H28C    | 109.5      |
| C26—C25—C23     | 108.6 (2)    | H28A—C28—H28C   | 109.5      |
| C9—C10—C5       | 121.2 (3)    | H28B—C28—H28C   | 109.5      |
| C3—N1—C4—C5     | 62.5 (2)     | C16—C11—C12—C13 | 2.2 (3)    |
| C2—N1—C4—C5     | -7.8 (3)     | C4—C11—C12—C13  | 176.2 (2)  |
| C3—N1—C4—C11    | -61.4 (2)    | C4—N1—C3—C2     | -114.9 (2) |
| C2—N1—C4—C11    | -131.6 (2)   | C23—C2—C3—N1    | -106.4 (2) |
| C3—N1—C4—C17    | -171.99 (18) | C11—C16—C15—C14 | 0.1 (4)    |
| C2—N1—C4—C17    | 117.8 (2)    | O24—C23—C29—C30 | -167.5 (2) |
| C18—C17—C4—N1   | -157.0 (2)   | C2—C23—C29—C30  | -51.5 (3)  |
| C22—C17—C4—N1   | 32.4 (3)     | C25—C23—C29—C30 | 74.1 (3)   |
| C18—C17—C4—C5   | -32.9 (3)    | O24—C23—C29—C32 | 68.3 (2)   |
| C22—C17—C4—C5   | 156.4 (2)    | C2—C23—C29—C32  | -175.7 (2) |
| C18—C17—C4—C11  | 89.9 (3)     | C25—C23—C29—C32 | -50.1 (3)  |
| C22—C17—C4—C11  | -80.8 (2)    | O24—C23—C29—C31 | -49.3 (2)  |
| C18—C17—C22—C21 | 1.0 (3)      | C2—C23—C29—C31  | 66.7 (2)   |
| C4—C17—C22—C21  | 172.0 (2)    | C25—C23—C29—C31 | -167.7 (2) |
| N1—C4—C5—C6     | 85.5 (3)     | O24—C23—C25—C28 | -172.1 (2) |
| C11—C4—C5—C6    | -154.4 (2)   | C2—C23—C25—C28  | 70.3 (3)   |
| C17—C4—C5—C6    | -37.5 (3)    | C29—C23—C25—C28 | -54.2 (3)  |
| N1—C4—C5—C10    | -88.7 (3)    | O24—C23—C25—C27 | -47.0 (3)  |
| C11—C4—C5—C10   | 31.3 (3)     | C2—C23—C25—C27  | -164.6 (2) |
| C17—C4—C5—C10   | 148.3 (2)    | C29—C23—C25—C27 | 70.9 (3)   |
| C4—N1—C2—C3     | 103.5 (2)    | O24—C23—C25—C26 | 68.7 (3)   |
| C3—N1—C2—C23    | 111.2 (2)    | C2—C23—C25—C26  | -49.0 (3)  |
| C4—N1—C2—C23    | -145.3 (2)   | C29—C23—C25—C26 | -173.5 (2) |
| C3—C2—C23—O24   | 42.3 (3)     | C6—C5—C10—C9    | 1.1 (4)    |
| N1—C2—C23—O24   | -26.7 (3)    | C4—C5—C10—C9    | 175.5 (2)  |

|                 |              |                 |            |
|-----------------|--------------|-----------------|------------|
| C3—C2—C23—C25   | 158.7 (2)    | C17—C22—C21—C20 | 0.8 (4)    |
| N1—C2—C23—C25   | 89.7 (2)     | C22—C21—C20—C19 | -1.5 (4)   |
| C3—C2—C23—C29   | -71.7 (3)    | C10—C5—C6—C7    | -0.5 (4)   |
| N1—C2—C23—C29   | -140.70 (19) | C4—C5—C6—C7     | -175.0 (2) |
| C22—C17—C18—C19 | -2.0 (4)     | C11—C12—C13—C14 | -1.1 (4)   |
| C4—C17—C18—C19  | -172.9 (2)   | C12—C13—C14—C15 | -0.5 (4)   |
| C5—C4—C11—C12   | 38.9 (3)     | C6—C7—C8—C9     | 0.7 (5)    |
| C17—C4—C11—C12  | -84.1 (2)    |                 |            |

All esds (except the esd in the dihedral angle between two l.s. planes) are estimated using the full covariance matrix. The cell esds are taken into account individually in the estimation of esds in distances, angles and torsion angles; correlations between esds in cell parameters are only used when they are defined by crystal symmetry. An approximate (isotropic) treatment of cell esds is used for estimating esds involving l.s. planes.



## Crystal data for compound 6d1

### *Crystal data*

C<sub>27</sub>H<sub>31</sub>NO<sub>2</sub>

Monoclinic, P2<sub>1</sub>/n

$M_r =$ 401.53

$D_x =$ 1.196 Mg m<sup>-3</sup>

$Z =$ 4

Mo K $\alpha$  radiation,  $\lambda =$ 0.71073 Å

$a =$ 10.1290 (2) Å

Cell parameters from 2931 reflections

$b =$ 21.4734 (5) Å

$\theta =$ 0.9–27.5°

$c =$ 11.2441 (3) Å

$\mu =$ 0.07 mm<sup>-1</sup>

$\beta =$ 114.2409 (10)°

$T =$ 183 K

$V =$ 2229.98 (9) Å<sup>3</sup>

Prism, colourless

$F(000) =$ 864

0.34 × 0.24 × 0.03 mm

### *Data collection*



Bruker-Nonius KappaCCD  
diffractometer

3852 reflections with  $I > 2\sigma(I)$

Radiation source: fine-focus sealed tube  $R_{\text{int}} = \underline{0.039}$

Graphite monochromator

$2\theta_{\text{max}} = 58.0^\circ$ ,

$\varphi$  and  $\omega$  scan

$h = \underline{-13 \ 13}$

5716 independent reflections

$k = \underline{-29 \ 26}$

9463 measured reflections

$l = \underline{-15 \ 15}$

### *Refinement*

Refinement on  $F^2$

Secondary atom site location: difference  
Fourier map

Least-squares matrix: full

Hydrogen site location: mixed

$R[F^2 > 2\sigma(F^2)] = \underline{0.060}$

H atoms treated by a mixture of  
independent and constrained refinement

$wR(F^2) = \underline{0.137}$

$w = 1/[\sigma^2(F_o^2) + (0.0437P)^2 + 1.0682P]$   
where  $P = (F_o^2 + 2F_c^2)/3$

$S = \underline{1.01}$

$(\Delta/\sigma)_{\max} = \underline{0.011}$

5716 reflections

$\Delta\rho_{\max} = \underline{0.25} \text{ e } \text{\AA}^{-3}$

279 parameters

$\Delta\rho_{\min} = \underline{-0.20} \text{ e } \text{\AA}^{-3}$

0 restraints

Extinction correction: none

Primary atom site location: structure-invariant direct methods

Refinement of  $F^2$  against ALL reflections. The weighted R-factor  $wR$  and goodness of fit  $S$  are based on  $F^2$ , conventional R-factors  $R$  are based on  $F$ , with  $F$  set to zero for negative  $F^2$ . The threshold expression of  $F^2 > 2\sigma(F^2)$  is used only for calculating R-factors(gt) etc. and is not relevant to the choice of reflections for refinement. R-factors based on  $F^2$  are statistically about twice as large as those based on  $F$ , and R-factors based on ALL data will be even larger.

Fractional atomic coordinates and isotropic or equivalent isotropic displacement parameters ( $\text{\AA}^2$ )

|     | $x$          | $y$         | $z$          | $U_{\text{iso}}^*/U_{\text{eq}}$ |
|-----|--------------|-------------|--------------|----------------------------------|
| N1  | 0.39493 (14) | 0.17771 (6) | 0.60222 (12) | 0.0253 (3)                       |
| O25 | 0.57074 (13) | 0.10366 (6) | 0.48488 (13) | 0.0334 (3)                       |
| H25 | 0.616 (3)    | 0.1270 (12) | 0.557 (3)    | 0.064 (8)*                       |

|     |              |             |              |            |
|-----|--------------|-------------|--------------|------------|
| O11 | 0.67065 (14) | 0.19706 (6) | 0.72208 (13) | 0.0386 (3) |
| H11 | 0.573 (3)    | 0.2035 (11) | 0.668 (2)    | 0.061 (7)* |
| C4  | 0.39462 (16) | 0.15780 (8) | 0.73076 (15) | 0.0249 (3) |
| C6  | 0.67213 (18) | 0.15281 (8) | 0.81040 (16) | 0.0298 (4) |
| C12 | 0.27332 (17) | 0.11127 (8) | 0.71433 (15) | 0.0278 (4) |
| C24 | 0.43845 (17) | 0.13648 (8) | 0.40819 (16) | 0.0265 (4) |
| C18 | 0.38036 (17) | 0.21844 (8) | 0.79856 (16) | 0.0272 (4) |
| C2  | 0.34621 (17) | 0.13685 (8) | 0.48639 (15) | 0.0261 (4) |
| H2  | 0.2991       | 0.0962      | 0.4836       | 0.031*     |
| C27 | 0.36294 (19) | 0.09696 (9) | 0.28152 (17) | 0.0337 (4) |
| C5  | 0.54491 (17) | 0.12994 (8) | 0.81572 (15) | 0.0260 (4) |
| C3  | 0.25577 (17) | 0.19018 (9) | 0.49144 (16) | 0.0312 (4) |
| H3A | 0.1687       | 0.1815      | 0.5013       | 0.037*     |

|      |              |             |              |            |
|------|--------------|-------------|--------------|------------|
| H3B  | 0.2531       | 0.2303      | 0.4479       | 0.037*     |
| C9   | 0.6947 (2)   | 0.06445 (9) | 0.99840 (17) | 0.0378 (4) |
| H9   | 0.6980       | 0.0315      | 1.0596       | 0.045*     |
| C26  | 0.47580 (19) | 0.20216 (8) | 0.38009 (17) | 0.0324 (4) |
| H26A | 0.5393       | 0.2014      | 0.3332       | 0.039*     |
| H26B | 0.3926       | 0.2259      | 0.3266       | 0.039*     |
| H26C | 0.5196       | 0.2274      | 0.4565       | 0.039*     |
| C13  | 0.28552 (19) | 0.04961 (8) | 0.67974 (16) | 0.0328 (4) |
| H13  | 0.3701       | 0.0335      | 0.6700       | 0.039*     |
| C10  | 0.56019 (19) | 0.08596 (8) | 0.91192 (16) | 0.0314 (4) |
| H10  | 0.4696       | 0.0654      | 0.9144       | 0.038*     |
| C19  | 0.3596 (2)   | 0.27637 (8) | 0.73947 (18) | 0.0339 (4) |
| H19  | 0.3363       | 0.2799      | 0.6440       | 0.041*     |

|     |              |              |              |            |
|-----|--------------|--------------|--------------|------------|
| C20 | 0.3461 (2)   | 0.32944 (9)  | 0.80463 (19) | 0.0390 (4) |
| H20 | 0.3305       | 0.3694       | 0.7528       | 0.047*     |
| C17 | 0.14797 (19) | 0.12802 (10) | 0.72896 (17) | 0.0368 (4) |
| H17 | 0.1356       | 0.1736       | 0.7498       | 0.044*     |
| C22 | 0.3766 (2)   | 0.26822 (9)  | 0.99038 (18) | 0.0370 (4) |
| H22 | 0.3943       | 0.2663       | 1.0872       | 0.044*     |
| C23 | 0.3905 (2)   | 0.21536 (9)  | 0.92582 (17) | 0.0346 (4) |
| H23 | 0.4081       | 0.1761       | 0.9704       | 0.041*     |
| C21 | 0.35381 (19) | 0.32561 (9)  | 0.92951 (18) | 0.0364 (4) |
| H21 | 0.3376       | 0.3646       | 0.9735       | 0.044*     |
| C7  | 0.80758 (19) | 0.13136 (9)  | 0.89766 (18) | 0.0380 (4) |
| H7  | 0.8957       | 0.1512       | 0.8921       | 0.046*     |
| C28 | 0.3393 (2)   | 0.02969 (10) | 0.3154 (2)   | 0.0473 (5) |

|      |            |              |              |            |
|------|------------|--------------|--------------|------------|
| H28A | 0.2929     | 0.0061       | 0.2365       | 0.057*     |
| H28B | 0.2792     | 0.0298       | 0.3629       | 0.057*     |
| H28C | 0.4311     | 0.0111       | 0.3680       | 0.057*     |
| C29  | 0.4585 (2) | 0.09445 (10) | 0.20555 (19) | 0.0427 (5) |
| H29A | 0.4119     | 0.0701       | 0.1278       | 0.051*     |
| H29B | 0.5498     | 0.0759       | 0.2594       | 0.051*     |
| H29C | 0.4741     | 0.1360       | 0.1824       | 0.051*     |
| C14  | 0.1767 (2) | 0.00666 (10) | 0.65940 (18) | 0.0430 (5) |
| H14  | 0.1875     | −0.0350      | 0.6337       | 0.052*     |
| C8   | 0.8184 (2) | 0.08744 (10) | 0.99092 (19) | 0.0411 (5) |
| H8   | 0.9183     | 0.0738       | 1.0528       | 0.049*     |
| C15  | 0.0540 (2) | 0.02368 (11) | 0.6753 (2)   | 0.0494 (6) |
| H15  | −0.0208    | −0.0064      | 0.6625       | 0.059*     |

|      |            |              |            |            |
|------|------------|--------------|------------|------------|
| C16  | 0.0398 (2) | 0.08378 (12) | 0.7103 (2) | 0.0491 (6) |
| H16  | −0.0455    | 0.0951       | 0.7224     | 0.059*     |
| C30  | 0.2165 (2) | 0.12577 (12) | 0.1938 (2) | 0.0553 (6) |
| H30A | 0.1714     | 0.1010       | 0.1165     | 0.066*     |
| H30B | 0.2312     | 0.1673       | 0.1701     | 0.066*     |
| H30C | 0.1551     | 0.1270       | 0.2400     | 0.066*     |

Atomic displacement parameters (Å<sup>2</sup>)

|     | $U^{11}$   | $U^{22}$   | $U^{33}$   | $U^{12}$   | $U^{13}$   | $U^{23}$   |
|-----|------------|------------|------------|------------|------------|------------|
| N1  | 0.0277 (7) | 0.0260 (7) | 0.0225 (6) | 0.0021 (6) | 0.0107 (5) | 0.0016 (5) |
| O25 | 0.0314 (6) | 0.0355 (7) | 0.0326 (7) | 0.0066 (5) | 0.0123 (5) | 0.0048 (6) |

|     |             |             |            |             |            |             |
|-----|-------------|-------------|------------|-------------|------------|-------------|
| O11 | 0.0334 (7)  | 0.0405 (8)  | 0.0398 (7) | −0.0111 (6) | 0.0127 (6) | 0.0005 (6)  |
| C4  | 0.0269 (8)  | 0.0251 (8)  | 0.0225 (7) | 0.0004 (6)  | 0.0099 (6) | 0.0014 (6)  |
| C6  | 0.0316 (8)  | 0.0280 (9)  | 0.0282 (8) | −0.0028 (7) | 0.0107 (7) | −0.0069 (7) |
| C12 | 0.0292 (8)  | 0.0320 (9)  | 0.0206 (7) | −0.0015 (7) | 0.0085 (7) | 0.0030 (7)  |
| C24 | 0.0279 (8)  | 0.0258 (9)  | 0.0260 (8) | 0.0029 (7)  | 0.0112 (7) | 0.0025 (7)  |
| C18 | 0.0278 (8)  | 0.0275 (9)  | 0.0264 (8) | 0.0019 (7)  | 0.0114 (7) | −0.0013 (7) |
| C2  | 0.0279 (8)  | 0.0268 (9)  | 0.0222 (8) | −0.0035 (6) | 0.0089 (7) | −0.0028 (6) |
| C27 | 0.0380 (9)  | 0.0372 (10) | 0.0278 (9) | −0.0014 (8) | 0.0154 (8) | −0.0041 (8) |
| C5  | 0.0279 (8)  | 0.0245 (8)  | 0.0233 (8) | 0.0004 (6)  | 0.0082 (7) | −0.0044 (6) |
| C3  | 0.0268 (8)  | 0.0398 (10) | 0.0270 (8) | 0.0049 (7)  | 0.0111 (7) | 0.0042 (7)  |
| C9  | 0.0416 (10) | 0.0363 (10) | 0.0267 (9) | 0.0048 (8)  | 0.0051 (8) | −0.0001 (8) |
| C26 | 0.0356 (9)  | 0.0311 (10) | 0.0330 (9) | 0.0005 (7)  | 0.0166 (8) | 0.0041 (7)  |
| C13 | 0.0365 (9)  | 0.0303 (10) | 0.0275 (8) | −0.0036 (7) | 0.0088 (7) | 0.0050 (7)  |



|     |             |             |             |              |             |             |
|-----|-------------|-------------|-------------|--------------|-------------|-------------|
| C10 | 0.0357 (9)  | 0.0295 (9)  | 0.0254 (8)  | 0.0014 (7)   | 0.0089 (7)  | −0.0009 (7) |
| C19 | 0.0443 (10) | 0.0280 (9)  | 0.0311 (9)  | 0.0050 (8)   | 0.0172 (8)  | 0.0012 (7)  |
| C20 | 0.0501 (11) | 0.0281 (10) | 0.0387 (10) | 0.0065 (8)   | 0.0182 (9)  | 0.0009 (8)  |
| C17 | 0.0317 (9)  | 0.0484 (12) | 0.0307 (9)  | −0.0013 (8)  | 0.0132 (8)  | 0.0042 (8)  |
| C22 | 0.0435 (10) | 0.0396 (11) | 0.0302 (9)  | 0.0020 (8)   | 0.0174 (8)  | −0.0046 (8) |
| C23 | 0.0454 (10) | 0.0313 (10) | 0.0293 (9)  | 0.0037 (8)   | 0.0176 (8)  | 0.0027 (7)  |
| C21 | 0.0364 (9)  | 0.0346 (10) | 0.0389 (10) | 0.0056 (8)   | 0.0162 (8)  | −0.0087 (8) |
| C7  | 0.0278 (8)  | 0.0422 (11) | 0.0395 (10) | −0.0039 (8)  | 0.0093 (8)  | −0.0120 (9) |
| C28 | 0.0671 (14) | 0.0401 (12) | 0.0458 (11) | −0.0179 (10) | 0.0343 (11) | −0.0165 (9) |
| C29 | 0.0605 (13) | 0.0410 (11) | 0.0347 (10) | 0.0020 (9)   | 0.0277 (9)  | 0.0004 (8)  |
| C14 | 0.0516 (12) | 0.0354 (11) | 0.0328 (10) | −0.0132 (9)  | 0.0082 (9)  | 0.0045 (8)  |
| C8  | 0.0339 (9)  | 0.0428 (11) | 0.0345 (10) | 0.0082 (8)   | 0.0017 (8)  | −0.0073 (9) |
| C15 | 0.0431 (11) | 0.0607 (15) | 0.0376 (11) | −0.0225 (10) | 0.0096 (9)  | 0.0073 (10) |

|     |             |             |             |              |            |              |
|-----|-------------|-------------|-------------|--------------|------------|--------------|
| C16 | 0.0324 (10) | 0.0785 (17) | 0.0381 (11) | -0.0083 (10) | 0.0161 (9) | 0.0076 (11)  |
| C30 | 0.0426 (11) | 0.0734 (17) | 0.0361 (11) | 0.0019 (11)  | 0.0022 (9) | -0.0144 (11) |

Geometric parameters (Å, °)

|         |             |          |           |
|---------|-------------|----------|-----------|
| N1—C3   | 1.472 (2)   | C26—H26C | 0.9569    |
| N1—C2   | 1.477 (2)   | C13—C14  | 1.382 (3) |
| N1—C4   | 1.508 (2)   | C13—H13  | 0.9708    |
| O25—C24 | 1.4446 (19) | C10—H10  | 1.0289    |
| O25—H25 | 0.90 (3)    | C19—C20  | 1.392 (3) |
| O11—C6  | 1.370 (2)   | C19—H19  | 1.0032    |
| O11—H11 | 0.94 (2)    | C20—C21  | 1.376 (3) |
| C4—C12  | 1.535 (2)   | C20—H20  | 1.0131    |
| C4—C18  | 1.545 (2)   | C17—C16  | 1.399 (3) |
| C4—C5   | 1.547 (2)   | C17—H17  | 1.0264    |

|         |           |          |           |
|---------|-----------|----------|-----------|
| C6—C7   | 1.397 (2) | C22—C21  | 1.382 (3) |
| C6—C5   | 1.403 (2) | C22—C23  | 1.385 (3) |
| C12—C17 | 1.393 (2) | C22—H22  | 1.0286    |
| C12—C13 | 1.400 (2) | C23—H23  | 0.9599    |
| C24—C2  | 1.523 (2) | C21—H21  | 1.0197    |
| C24—C26 | 1.526 (2) | C7—C8    | 1.381 (3) |
| C24—C27 | 1.562 (2) | C7—H7    | 1.0138    |
| C18—C19 | 1.385 (2) | C28—H28A | 0.9601    |
| C18—C23 | 1.393 (2) | C28—H28B | 0.9599    |
| C2—C3   | 1.482 (2) | C28—H28C | 0.9600    |
| C2—H2   | 0.9881    | C29—H29A | 0.9600    |
| C27—C29 | 1.532 (3) | C29—H29B | 0.9601    |
| C27—C30 | 1.535 (3) | C29—H29C | 0.9602    |

|             |             |             |             |
|-------------|-------------|-------------|-------------|
| C27—C28     | 1.538 (3)   | C14—C15     | 1.376 (3)   |
| C5—C10      | 1.396 (2)   | C14—H14     | 0.9602      |
| C3—H3A      | 0.9520      | C8—H8       | 1.0084      |
| C3—H3B      | 0.9851      | C15—C16     | 1.374 (3)   |
| C9—C8       | 1.380 (3)   | C15—H15     | 0.9600      |
| C9—C10      | 1.389 (2)   | C16—H16     | 0.9600      |
| C9—H9       | 0.9790      | C30—H30A    | 0.9600      |
| C26—H26A    | 0.9848      | C30—H30B    | 0.9601      |
| C26—H26B    | 0.9570      | C30—H30C    | 0.9601      |
| C3—N1—C2    | 60.33 (11)  | C14—C13—H13 | 115.1       |
| C3—N1—C4    | 118.96 (13) | C12—C13—H13 | 123.4       |
| C2—N1—C4    | 123.03 (13) | C9—C10—C5   | 122.17 (17) |
| C24—O25—H25 | 105.8 (16)  | C9—C10—H10  | 117.9       |

|             |             |             |             |
|-------------|-------------|-------------|-------------|
| C6—O11—H11  | 105.6 (15)  | C5—C10—H10  | 119.7       |
| N1—C4—C12   | 112.69 (12) | C18—C19—C20 | 120.77 (17) |
| N1—C4—C18   | 105.74 (13) | C18—C19—H19 | 120.3       |
| C12—C4—C18  | 112.06 (13) | C20—C19—H19 | 118.0       |
| N1—C4—C5    | 108.22 (13) | C21—C20—C19 | 120.75 (18) |
| C12—C4—C5   | 111.02 (13) | C21—C20—H20 | 124.6       |
| C18—C4—C5   | 106.78 (12) | C19—C20—H20 | 114.7       |
| O11—C6—C7   | 116.94 (16) | C12—C17—C16 | 120.2 (2)   |
| O11—C6—C5   | 122.46 (15) | C12—C17—H17 | 118.4       |
| C7—C6—C5    | 120.60 (17) | C16—C17—H17 | 121.4       |
| C17—C12—C13 | 117.77 (16) | C21—C22—C23 | 120.21 (17) |
| C17—C12—C4  | 122.76 (16) | C21—C22—H22 | 118.8       |
| C13—C12—C4  | 119.44 (15) | C23—C22—H22 | 120.6       |

|             |             |               |             |
|-------------|-------------|---------------|-------------|
| O25—C24—C2  | 107.24 (13) | C22—C23—C18   | 121.24 (17) |
| O25—C24—C26 | 109.05 (13) | C22—C23—H23   | 118.9       |
| C2—C24—C26  | 112.18 (14) | C18—C23—H23   | 119.9       |
| O25—C24—C27 | 105.43 (13) | C20—C21—C22   | 119.11 (17) |
| C2—C24—C27  | 110.02 (13) | C20—C21—H21   | 119.5       |
| C26—C24—C27 | 112.55 (14) | C22—C21—H21   | 121.3       |
| C19—C18—C23 | 117.89 (16) | C8—C7—C6      | 120.48 (18) |
| C19—C18—C4  | 123.15 (15) | C8—C7—H7      | 122.4       |
| C23—C18—C4  | 118.95 (15) | C6—C7—H7      | 117.0       |
| N1—C2—C3    | 59.68 (10)  | C27—C28—H28A  | 109.5       |
| N1—C2—C24   | 116.74 (13) | C27—C28—H28B  | 109.5       |
| C3—C2—C24   | 124.15 (15) | H28A—C28—H28B | 109.5       |
| N1—C2—H2    | 122.3       | C27—C28—H28C  | 109.5       |

|             |             |               |             |
|-------------|-------------|---------------|-------------|
| C3—C2—H2    | 112.6       | H28A—C28—H28C | 109.5       |
| C24—C2—H2   | 112.3       | H28B—C28—H28C | 109.5       |
| C29—C27—C30 | 108.74 (17) | C27—C29—H29A  | 109.9       |
| C29—C27—C28 | 107.66 (16) | C27—C29—H29B  | 109.2       |
| C30—C27—C28 | 109.28 (17) | H29A—C29—H29B | 109.5       |
| C29—C27—C24 | 110.04 (15) | C27—C29—H29C  | 109.3       |
| C30—C27—C24 | 110.44 (15) | H29A—C29—H29C | 109.5       |
| C28—C27—C24 | 110.63 (15) | H29B—C29—H29C | 109.5       |
| C10—C5—C6   | 117.27 (15) | C15—C14—C13   | 120.2 (2)   |
| C10—C5—C4   | 120.54 (15) | C15—C14—H14   | 120.5       |
| C6—C5—C4    | 121.76 (15) | C13—C14—H14   | 119.3       |
| N1—C3—C2    | 59.99 (10)  | C7—C8—C9      | 119.97 (17) |
| N1—C3—H3A   | 118.5       | C7—C8—H8      | 117.8       |

|               |             |               |             |
|---------------|-------------|---------------|-------------|
| C2—C3—H3A     | 118.0       | C9—C8—H8      | 122.2       |
| N1—C3—H3B     | 113.6       | C16—C15—C14   | 119.55 (19) |
| C2—C3—H3B     | 123.2       | C16—C15—H15   | 120.4       |
| H3A—C3—H3B    | 113.0       | C14—C15—H15   | 120.1       |
| C8—C9—C10     | 119.50 (18) | C15—C16—C17   | 120.9 (2)   |
| C8—C9—H9      | 122.2       | C15—C16—H16   | 119.0       |
| C10—C9—H9     | 118.2       | C17—C16—H16   | 120.1       |
| C24—C26—H26A  | 111.6       | C27—C30—H30A  | 109.5       |
| C24—C26—H26B  | 113.1       | C27—C30—H30B  | 109.5       |
| H26A—C26—H26B | 105.8       | H30A—C30—H30B | 109.5       |
| C24—C26—H26C  | 113.6       | C27—C30—H30C  | 109.5       |
| H26A—C26—H26C | 109.0       | H30A—C30—H30C | 109.5       |
| H26B—C26—H26C | 103.1       | H30B—C30—H30C | 109.5       |



|                |              |               |              |
|----------------|--------------|---------------|--------------|
| C14—C13—C12    | 121.45 (18)  |               |              |
| C3—N1—C4—C12   | 40.8 (2)     | O11—C6—C5—C10 | -178.53 (16) |
| C2—N1—C4—C12   | -30.8 (2)    | C7—C6—C5—C10  | 0.7 (2)      |
| C3—N1—C4—C18   | -81.93 (16)  | O11—C6—C5—C4  | -6.0 (2)     |
| C2—N1—C4—C18   | -153.57 (13) | C7—C6—C5—C4   | 173.25 (15)  |
| C3—N1—C4—C5    | 163.95 (14)  | N1—C4—C5—C10  | -153.50 (15) |
| C2—N1—C4—C5    | 92.32 (16)   | C12—C4—C5—C10 | -29.3 (2)    |
| N1—C4—C12—C17  | -104.32 (18) | C18—C4—C5—C10 | 93.07 (18)   |
| C18—C4—C12—C17 | 14.8 (2)     | N1—C4—C5—C6   | 34.2 (2)     |
| C5—C4—C12—C17  | 134.11 (16)  | C12—C4—C5—C6  | 158.37 (15)  |
| N1—C4—C12—C13  | 73.89 (18)   | C18—C4—C5—C6  | -79.21 (18)  |
| C18—C4—C12—C13 | -166.99 (14) | C4—N1—C3—C2   | -113.69 (15) |
| C5—C4—C12—C13  | -47.69 (19)  | C24—C2—C3—N1  | -103.49 (16) |

|                |              |                 |              |
|----------------|--------------|-----------------|--------------|
| N1—C4—C18—C19  | 5.1 (2)      | C17—C12—C13—C14 | 0.6 (2)      |
| C12—C4—C18—C19 | -118.06 (17) | C4—C12—C13—C14  | -177.70 (15) |
| C5—C4—C18—C19  | 120.17 (17)  | C8—C9—C10—C5    | 0.7 (3)      |
| N1—C4—C18—C23  | -174.11 (14) | C6—C5—C10—C9    | -1.0 (3)     |
| C12—C4—C18—C23 | 62.76 (19)   | C4—C5—C10—C9    | -173.59 (16) |
| C5—C4—C18—C23  | -59.00 (19)  | C23—C18—C19—C20 | -1.4 (3)     |
| C4—N1—C2—C3    | 107.11 (16)  | C4—C18—C19—C20  | 179.40 (17)  |
| C3—N1—C2—C24   | 115.69 (17)  | C18—C19—C20—C21 | 0.3 (3)      |
| C4—N1—C2—C24   | -137.20 (15) | C13—C12—C17—C16 | 0.5 (2)      |
| O25—C24—C2—N1  | 72.11 (17)   | C4—C12—C17—C16  | 178.77 (16)  |
| C26—C24—C2—N1  | -47.60 (19)  | C21—C22—C23—C18 | -0.8 (3)     |
| C27—C24—C2—N1  | -173.71 (13) | C19—C18—C23—C22 | 1.7 (3)      |
| O25—C24—C2—C3  | 142.15 (15)  | C4—C18—C23—C22  | -179.13 (16) |

|                 |              |                 |             |
|-----------------|--------------|-----------------|-------------|
| C26—C24—C2—C3   | 22.5 (2)     | C19—C20—C21—C22 | 0.6 (3)     |
| C27—C24—C2—C3   | -103.66 (18) | C23—C22—C21—C20 | -0.4 (3)    |
| O25—C24—C27—C29 | -62.45 (18)  | O11—C6—C7—C8    | 179.05 (17) |
| C2—C24—C27—C29  | -177.77 (15) | C5—C6—C7—C8     | -0.3 (3)    |
| C26—C24—C27—C29 | 56.32 (19)   | C12—C13—C14—C15 | -1.2 (3)    |
| O25—C24—C27—C30 | 177.50 (16)  | C6—C7—C8—C9     | 0.0 (3)     |
| C2—C24—C27—C30  | 62.2 (2)     | C10—C9—C8—C7    | -0.2 (3)    |
| C26—C24—C27—C30 | -63.7 (2)    | C13—C14—C15—C16 | 0.6 (3)     |
| O25—C24—C27—C28 | 56.38 (18)   | C14—C15—C16—C17 | 0.5 (3)     |
| C2—C24—C27—C28  | -58.94 (19)  | C12—C17—C16—C15 | -1.1 (3)    |
| C26—C24—C27—C28 | 175.15 (15)  |                 |             |

All esds (except the esd in the dihedral angle between two l.s. planes) are estimated using the full covariance matrix. The cell esds are taken into account individually in the estimation of esds in distances, angles and torsion angles; correlations between esds in cell parameters are only used when they are defined by crystal symmetry.

An approximate (isotropic) treatment of cell esds is used for estimating esds involving l.s. planes.
